# Supplementary material for: Boron Lewis acid-catalyzed formal insertion of isocyanides into a C–O bond of benzyl esters
Source: Royal Society of Chemistry journal article supplement (doi:10.1039/d3qo00944k), 2023-01-01
Supplement: d3qo00944k1.pdf [file d3qo00944k1.pdf]

## Boron Lewis acid-catalyzed formal insertion of isocyanides into a C-O bond of benzyl esters

Tong-Tong Xu, Yuanjiu Xiao, Jin-Lan Zhou, Lei Tang, Feng Wu,  
Jiang-Yi-Hui Sheng, Wen-Biao Wu\* and Jian-Jun Feng\*

*State Key Laboratory of Chemo/Biosensing and Chemometrics, Hunan Provincial  
Key Laboratory of Animal Models and Molecular Medicine, College of Chemistry and  
Chemical Engineering, Hunan University, Changsha, Hunan 410082, P. R. China*

1334154923@qq.com  
jianjunfeng@hnu.edu.cn

### Supporting Information

#### Table of Contents

|    |                                                                                                                |     |
|----|----------------------------------------------------------------------------------------------------------------|-----|
| 1  | General Information .....                                                                                      | S2  |
| 2  | Optimization of Reaction Conditions .....                                                                      | S3  |
| 3  | Unsuccessful Substrates .....                                                                                  | S4  |
| 4  | General Procedure for B(C <sub>6</sub> F <sub>5</sub> ) <sub>3</sub> Catalyzed Isocyanide Insertions (GP)..... | S5  |
| 5  | Direct Cyanation of Ester .....                                                                                | S6  |
| 6  | Scale-Up Experiment .....                                                                                      | S6  |
| 7  | Synthetic Transformations .....                                                                                | S7  |
| 8  | Characterization Data of the Products .....                                                                    | S8  |
| 9  | Crystal Structure of <b>3sa</b> .....                                                                          | S33 |
| 10 | References .....                                                                                               | S35 |
| 11 | NMR Spectra .....                                                                                              | S36 |
| 12 | HPLC Spectra .....                                                                                             | S83 |

## 1 General Information

All reactions were performed in flame-dried glassware using conventional Schlenk techniques under a static pressure of nitrogen unless otherwise stated. Liquids and solutions were transferred with syringes. The known esters **1**,<sup>[1]</sup> isocyanides **2**<sup>[2]</sup> and ArNC-B(C<sub>5</sub>F<sub>5</sub>)<sub>3</sub> adduct **6**<sup>[3]</sup> (Ar = 2,6-diMeC<sub>6</sub>H<sub>3</sub>) were prepared according to reported procedures. The chiral ester (*R*)-**1ae** was prepared in 78% yield according to the known procedure.<sup>[4]</sup> (97% ee of (*R*)-**1ae** was determined by HPLC: AD-H Column, 4/96 *i*PrOH/hexane, 0.8 mL/min, 254 nm, 35 °C; retention time = 11.51 min (minor), 15.18 min (major)). Tris(pentafluorophenyl)borane (B(C<sub>5</sub>F<sub>5</sub>)<sub>3</sub>, 98%, *Energy Chemical*) was purchased from commercial suppliers and used as received. Other commercially available reagents were purchased from *Sigma-Aldrich*, *Leyan* and *Bide Chemical Company*. 1,1,1,3,3,3-hexafluoro-2-propanol (HFIP), chlorobenzene (PhCl) and ethyl acetate (EtOAc) were purchased from *Energy Chemical* (99%, Extra Dry) and used as received. Trichloromethane (CHCl<sub>3</sub>) was purchased from *Sinopharm Chemical Reagent*. All other solvents (hexane, toluene, tetrahydrofuran and 1,2-dichloroethane etc.) were dried and purified following standard procedures. Technical grade solvents for extraction or chromatography (Petroleum ether, CH<sub>2</sub>Cl<sub>2</sub>, and ethyl acetate) were distilled prior to use. Analytical thin layer chromatography (TLC) was performed on silica gel 60 F254 glass plates by *Merck*. Flash column chromatography was performed on silica gel 60 (40–63 μm, 230–400 mesh, ASTM) by *Grace* using the indicated solvents. <sup>1</sup>H, <sup>13</sup>C NMR spectra were recorded in CDCl<sub>3</sub> on Bruker AV400 instruments. Chemical shifts are reported in parts per million (ppm) and are referenced to the residual solvent resonance as the internal standard (CHCl<sub>3</sub>: δ = 7.26 ppm for <sup>1</sup>H NMR and CDCl<sub>3</sub>: δ = 77.0 ppm for <sup>13</sup>C NMR). Data are reported as follows: chemical shift, multiplicity (s = singlet, d = doublet, t = triplet, q = quartet, m = multiplet), coupling constants (Hz), and integration. The full-scan mass spectra were taken on a hybrid quadrupole-orbitrap mass spectrometer equipped with a heated electrospray ionization source (ThermoFischer Scientific, Bremen, Germany). Mass spectra were recorded on a THERMO FINNIGAN LTQ-XL. The MS inlet capillary temp always maintained at 275 °C and capillary voltage at 5 kV. No other source gases were used when digestion was performed in microdroplets. The samples were dissolved in 1:1 methanol:water.

## 2 Optimization of reaction conditions

### (a) Catalyst optimization<sup>a</sup>

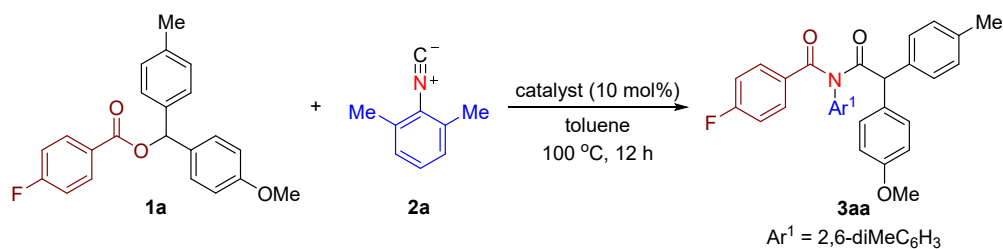

| Entry | catalyst                                       | yield (%) <sup>b</sup> |
|-------|------------------------------------------------|------------------------|
| 1     | B(C <sub>6</sub> F <sub>5</sub> ) <sub>3</sub> | 23                     |
| 2     | Zn(OTf) <sub>2</sub>                           | 0                      |
| 3     | Sc(OTf) <sub>3</sub>                           | 0                      |
| 4     | Cu(OTf) <sub>2</sub>                           | 0                      |
| 5     | BF <sub>3</sub> ·Et <sub>2</sub> O             | 0                      |
| 6     | FeCl <sub>3</sub>                              | 0                      |
| 7     | AlCl <sub>3</sub>                              | 18                     |
| 8     | AgClO <sub>4</sub>                             | 23                     |
| 9     | CF <sub>3</sub> COOH                           | 0                      |
| 10    | CF <sub>3</sub> SO <sub>3</sub> H              | 0                      |

<sup>a</sup>Reaction conditions: **1a** (0.2 mmol), **2a** (0.3 mmol) and catalyst (10 mol %) in toluene (2 mL) stirred at 100 °C for 12 h. <sup>b</sup>The yields were determined by <sup>1</sup>H NMR spectroscopy using CH<sub>2</sub>Br<sub>2</sub> as the internal standard.

### (b) Rejection time optimization<sup>a</sup>

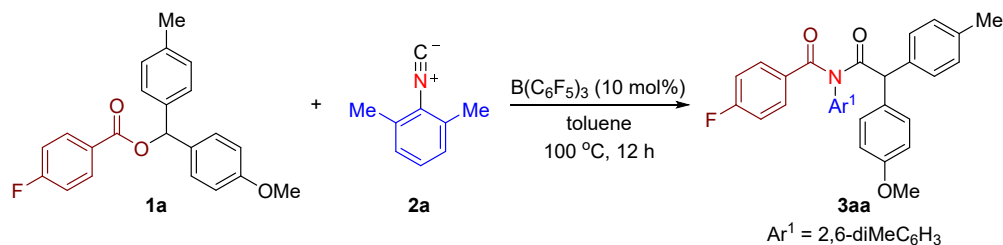

| entry | rejection time (min) | yield (%) <sup>b</sup> |
|-------|----------------------|------------------------|
| 1     | 100                  | 73                     |
| 2     | 50                   | 84                     |
| 3     | 25                   | 98                     |
| 4     | 0                    | 23                     |

<sup>a</sup>Reaction conditions: A mixture of **1a** (0.2 mmol) and **2a** (0.3 mmol) in toluene (1 mL) was added dropwise to the solution of B(C<sub>6</sub>F<sub>5</sub>)<sub>3</sub> (10 mol%) at 100 °C by using a syringe pump. After addition, the reaction mixture was further stirred for 12 h. <sup>b</sup>The yields were determined by <sup>1</sup>H NMR spectroscopy using CH<sub>2</sub>Br<sub>2</sub> as the internal standard.

### (c) Solvent optimization<sup>a</sup>

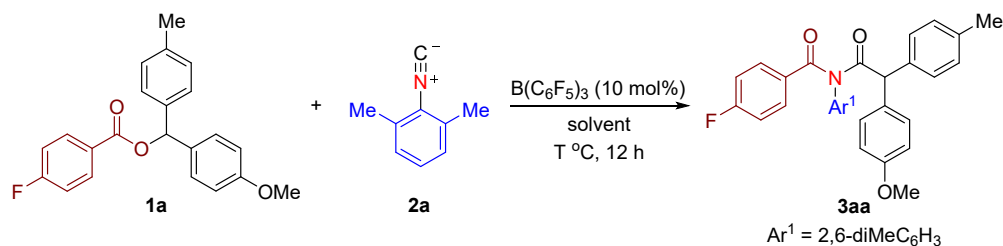

| Entry | solvent           | T (°C) | yield (%) <sup>b</sup> |
|-------|-------------------|--------|------------------------|
| 1     | toluene           | 100    | 98                     |
| 2     | hexane            | 64     | 0                      |
| 3     | THF               | 64     | 0                      |
| 4     | DCE               | 80     | 0                      |
| 5     | EtOAc             | 72     | 0                      |
| 6     | HFIP              | 57     | 10                     |
| 7     | PhCl              | 100    | 97                     |
| 8     | CHCl <sub>3</sub> | 57     | 0                      |

<sup>a</sup>Reaction conditions: A mixture of **1a** (0.2 mmol) and **2a** (0.3 mmol) in solvent (1 mL) was added dropwise to the solution of B(C<sub>6</sub>F<sub>5</sub>)<sub>3</sub> (10 mol%) for 25 min at 100 °C by using a syringe pump. After addition, the reaction mixture was further stirred for 12 h. <sup>b</sup>The yields were determined by <sup>1</sup>H NMR spectroscopy using CH<sub>2</sub>Br<sub>2</sub> as the internal standard.

#### (d) Other optimizations<sup>a</sup>

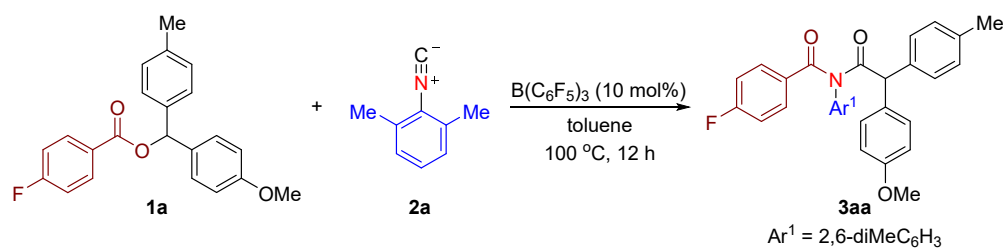

| entry | Variation from standard conditions                                                                 | yield (%) <sup>b</sup> |
|-------|----------------------------------------------------------------------------------------------------|------------------------|
| 1     | Run at 90 °C                                                                                       | 84                     |
| 2     | Run at 80 °C                                                                                       | 83                     |
| 3     | B(C <sub>6</sub> F <sub>5</sub> ) <sub>3</sub> (5 mol%) was used                                   | 32                     |
| 4     | B(C <sub>6</sub> F <sub>5</sub> ) <sub>3</sub> (2.5 mol%) was used                                 | 25                     |
| 5     | B(C <sub>6</sub> F <sub>5</sub> ) <sub>3</sub> (10 mol%) and Mes <sub>3</sub> P (10 mol%) was used | 0                      |

<sup>a</sup>Reaction conditions: A mixture of **1a** (0.2 mmol) and **2a** (0.3 mmol) in toluene (1 mL) was added dropwise to the solution of B(C<sub>6</sub>F<sub>5</sub>)<sub>3</sub> (10 mol%) for 25 min at 100 °C by using a syringe pump. After addition, the reaction mixture was further stirred for 12 h. <sup>b</sup>The yields were determined by <sup>1</sup>H NMR spectroscopy using CH<sub>2</sub>Br<sub>2</sub> as the internal standard.

### 3 Unsuccessful Substrates

Ester **1af**, **1ag**, **1ah**, **1ai** and **1aj** were unreactive in the B(C<sub>6</sub>F<sub>5</sub>)<sub>3</sub>-catalyzed protocol. No target product be obtained by using isocyanide **2g** and **2h**. Interestingly, the metal-free direct sulfonylation of ester was realized under the current reaction conditions by means of TosMIC **2i** as substrate.

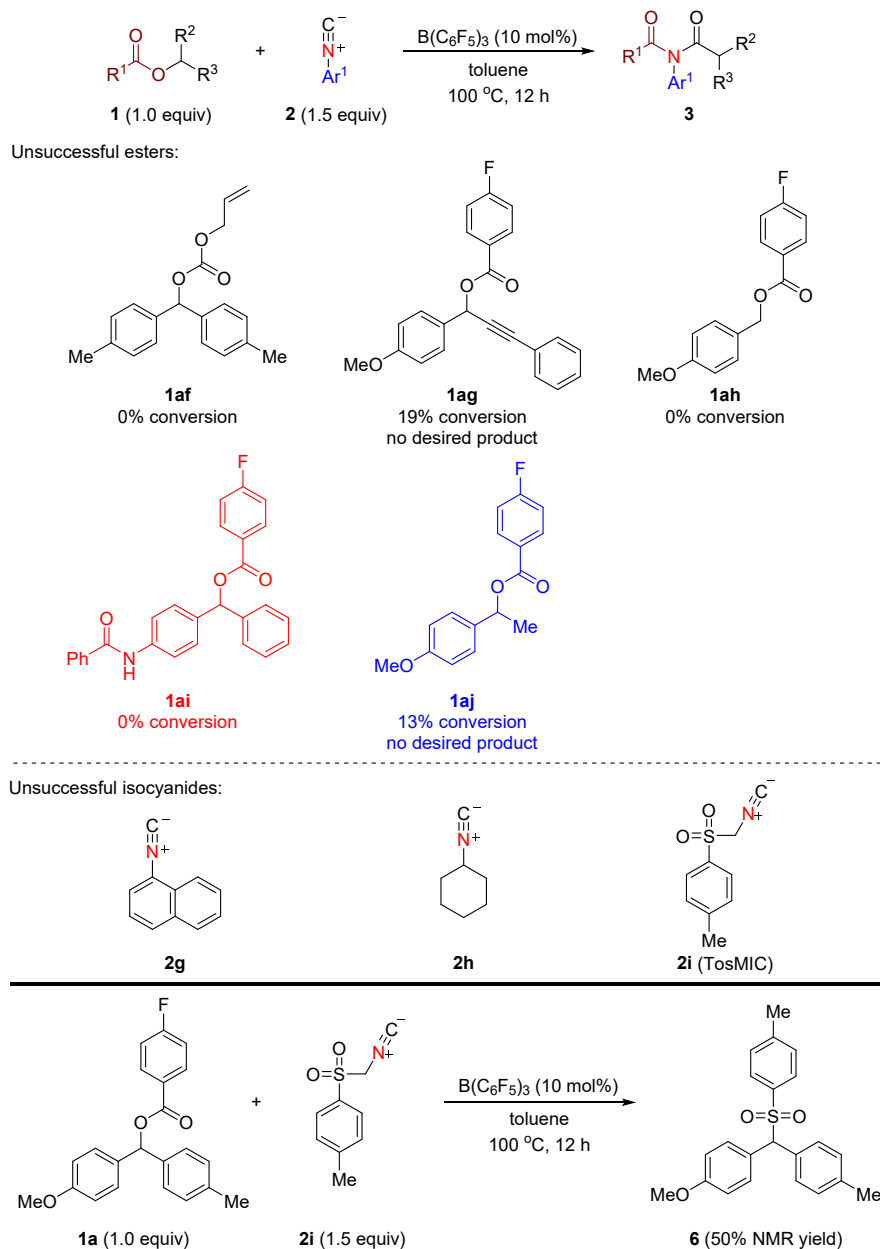

#### 4 General Procedure for B(C<sub>6</sub>F<sub>5</sub>)<sub>3</sub> Catalyzed Isocyanide Insertions (GP)

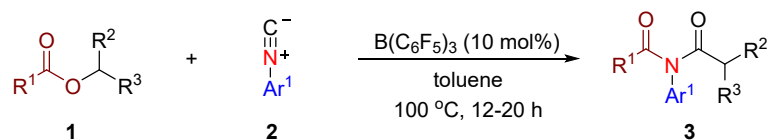

In glove box, to a flame-dried Schlenk tube A is charged with the B(C<sub>6</sub>F<sub>5</sub>)<sub>3</sub> (10.2 mg, 0.02 mmol, 10 mol %) and toluene (0.5 mL). The solution of B(C<sub>6</sub>F<sub>5</sub>)<sub>3</sub> is removed from the glovebox and stirred at 100 °C. Then, a solution of ester **1** (0.2 mmol, 1.0 equiv) and isocyanide **2** (0.3 mmol, 1.5 equiv) in toluene (1.0 mL) is added dropwise to tube A for 25 min by using a syringe pump. After addition, the reaction was further stirred

for 12-20 h at 100 °C. Evaporation of the solvents under reduced pressure afforded the crude title compound. Purification by flash column chromatography using the indicated mixtures of solvents as eluent yields the analytical pure imides **3**.

## 5 Direct Cyanation of Ester

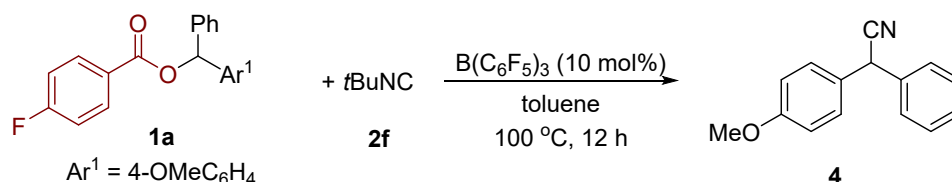

In glove box, to a flame-dried Schlenk tube A is charged with the B(C<sub>6</sub>F<sub>5</sub>)<sub>3</sub> (10.2 mg, 0.02 mmol, 10 mol %) and toluene (0.5 mL). The solution of B(C<sub>6</sub>F<sub>5</sub>)<sub>3</sub> is removed from the glovebox and stirred at 100 °C. Then, a solution of ester **1a** (67.3 mg, 0.2 mmol, 1.0 equiv) and *tert*-butyl isocyanide **2f** (24.9 mg, 0.3 mmol, 1.5 equiv) in toluene (1.0 mL) is added dropwise to tube A for 25 min by using a syringe pump. After addition, the reaction was further stirred for 12 h at 100 °C. Evaporation of the solvents under reduced pressure afforded the crude title compound. Purification by flash column chromatography using petroleum ether/EtOAc (10/1) to afford 2-(4-methoxyphenyl)-2-phenylacetonitrile **4** (white solid, 42.9 mg, 96% yield).

## 6 Scale-Up Experiment

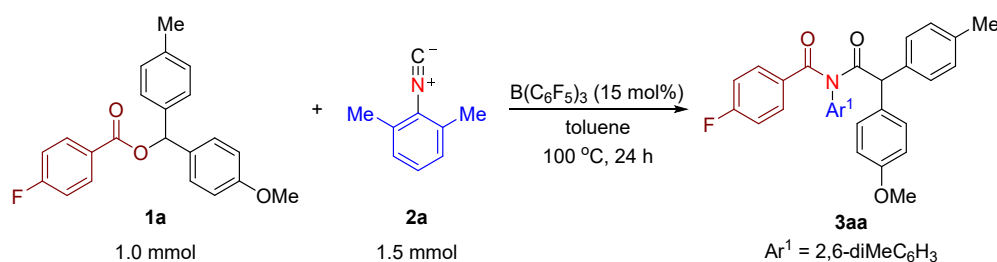

In glove box, to a flame-dried Schlenk tube A is charged with the B(C<sub>6</sub>F<sub>5</sub>)<sub>3</sub> (76.8 mg, 0.15 mmol, 15 mol %) and toluene (2.5 mL). The solution of B(C<sub>6</sub>F<sub>5</sub>)<sub>3</sub> is removed from the glovebox and stirred at 100 °C. Then, a solution of ester **1a** (350.4 mg, 1.0 mmol, 1.0 equiv) and isocyanide **2a** (196.8 mg, 1.5 mmol, 1.5 equiv) in toluene (5.0 mL) is added dropwise to tube A for 60 min by using a syringe pump. After addition, the

reaction was further stirred for 24 h at 100 °C. After the reaction completion, the mixture was evaporated under reduced pressure. Purification by flash column chromatography using petroleum ether/EtOAc (15/1) to afford pure product **3aa** (346.7 mg) in 72% yield.

## 7 Synthetic Transformations

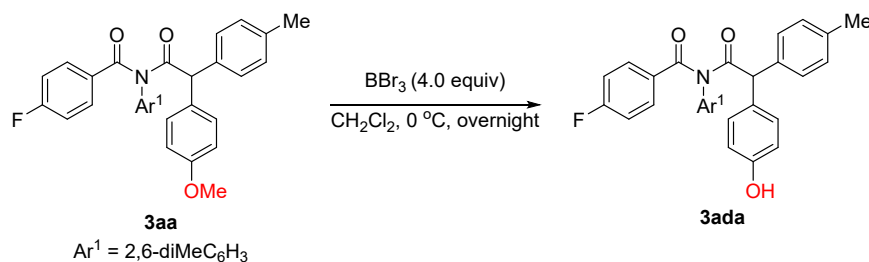

**Synthesis of (3ada)**<sup>[5]</sup>: To a solution of **3aa** (0.2 mmol, 1.0 equiv, 96.3 mg) in anhydrous CH<sub>2</sub>Cl<sub>2</sub> (2 mL) was added 1 M solution of boron tribromide in CH<sub>2</sub>Cl<sub>2</sub> (0.8 mmol, 4.0 equiv, 0.8 mL) dropwise at 0 °C. After stirring at room temperature overnight, the reaction was quenched by the addition of water. The mixture was partitioned between ethyl acetate and water. The phases were separated, and the aqueous phase was extracted with additional ethyl acetate. The combined organic phases were washed with brine and dried over magnesium sulfate. The solution was concentrated under reduced pressure. Purification by flash column chromatography using petroleum ether/EtOAc (3/1) to afford pure product **3ada** (yellow oil, 69.6 mg) in 75% yield.

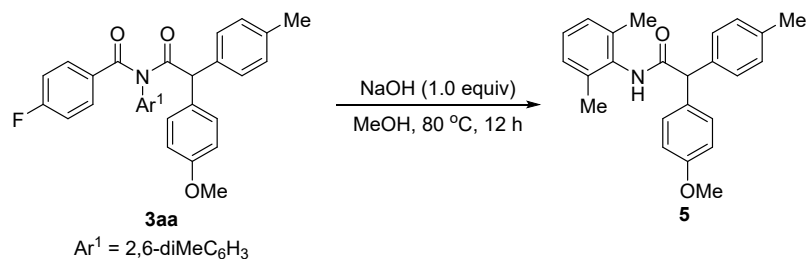

**Synthesis of (5)**<sup>[6]</sup>: A solution of **3aa** (0.2 mmol, 1.0 equiv, 96.3 mg) and NaOH (0.2 mmol, 1.0 equiv, 8 mg) in MeOH (4.0 mL) was refluxed in an oil bath for 12 hours. After cooled to room temperature, the solvent was removed under reduced pressure.

The contents were subjected to flash chromatography ether/EtOAc (5/1) to give the product **5** as yellow oil (56.7 mg, 82%).

## 8 Characterization Data of the Products

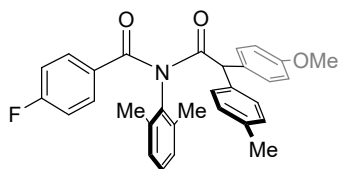

**3aa**

$C_{31}H_{28}FNO_3$   
M = 481.57 g/mol

### ***N*-(2,6-dimethylphenyl)-4-fluoro-*N*-(2-(4-methoxyphenyl)-2-(*p*-tolyl)acetyl)benzamide**

**(3aa)**: Prepared from 2-isocyano-1,3-dimethylbenzene (**2a**, 39.4 mg, 0.3 mmol) and (4-methoxyphenyl)(*p*-tolyl)methyl 4-fluorobenzoate (**1a**, 70.1 mg, 0.2 mmol) at 100 °C for 12 h according to the **GP**. Purification by flash chromatography on silica gel using petroleum ether/EtOAc (10/1 to 5/1) afforded **3aa** as a yellow oil (86.7 mg, 90% yield).

**3aa**:  $R_f$  = 0.30 (petroleum ether/EtOAc = 15/1).  **$^1H$  NMR** (400 MHz,  $CDCl_3$ ):  $\delta$  7.58–7.55 (m, 2H), 7.28–7.23 (m, 1H), 7.13–7.07 (m, 8H), 7.03–6.99 (m, 2H), 6.80 (d,  $J$  = 8.4 Hz, 2H), 4.82 (s, 1H), 3.75 (s, 3H), 2.29 (s, 3H), 2.00 (s, 6H) ppm.  **$^{13}C$  NMR** (100 MHz,  $CDCl_3$ ):  $\delta$  175.4, 171.3, 164.7 (d,  $J$  = 251.3 Hz), 159.0, 137.2, 137.04, 136.99, 135.4, 132.0 (d,  $J$  = 3.3 Hz), 130.6 (d,  $J$  = 9.0 Hz), 130.4, 129.8, 129.3, 129.11, 129.09, 128.5, 115.3 (d,  $J$  = 21.9 Hz), 114.0, 55.7, 55.2, 21.0, 18.3 ppm.  **$^{19}F$  NMR** (376 MHz,  $CDCl_3$ )  $\delta$  -107.06 (s) ppm. **HRMS** (ESI)  $m/z$ :  $[M+Na]^+$  calcd. for  $C_{31}H_{28}FNNaO_3$ : 504.1945; Found: 504.1941.

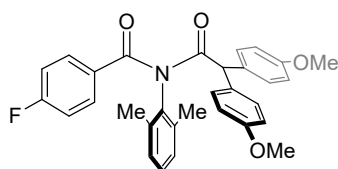

**3ba**

$C_{31}H_{28}FNO_4$   
M = 497.57 g/mol



***N*-(2,2-bis(4-methoxyphenyl)acetyl)-*N*-(2,6-dimethylphenyl)-4-fluorobenzamide (3ba):**

Prepared from 2-isocyano-1,3-dimethylbenzene (**2a**, 39.4 mg, 0.3 mmol) and bis(4-methoxyphenyl)methyl 4-fluorobenzoate (**1b**, 87.9 mg, 0.2 mmol) at 100 °C for 12 h according to the **GP**. Purification by flash chromatography on silica gel using petroleum ether/EtOAc (20/1 to 10/1) afforded **3ba** as a yellow oil (89.7 mg, 90% yield).

**3ba**:  $R_f$  = 0.4 (petroleum ether/EtOAc = 10/1). **<sup>1</sup>H NMR** (400 MHz, CDCl<sub>3</sub>): δ 7.58–7.55 (m, 2H), 7.30–7.25 (m, 1H), 7.16–7.12 (m, 6H), 7.04–7.00 (m, 2H), 6.81 (d,  $J$  = 8.8 Hz, 4H), 4.80 (s, 1H), 3.77 (s, 6H), 2.00 (s, 6H) ppm. **<sup>13</sup>C NMR** (100 MHz, CDCl<sub>3</sub>): δ 175.6, 171.3, 164.7 (d,  $J$  = 251.4 Hz), 158.9, 136.99, 136.95, 132.0 (d,  $J$  = 3.2 Hz), 130.6 (d,  $J$  = 8.9 Hz), 130.5, 129.8, 129.3, 129.1, 115.3 (d,  $J$  = 22.0 Hz), 113.9, 55.24, 55.21, 18.3 ppm. **<sup>19</sup>F NMR** (376 MHz, CDCl<sub>3</sub>) δ -107.08 (s) ppm. **HRMS** (ESI)  $m/z$ : [M+Na]<sup>+</sup> calcd. for C<sub>31</sub>H<sub>28</sub>FNNaO<sub>4</sub>: 520.1895; Found: 520.1895.

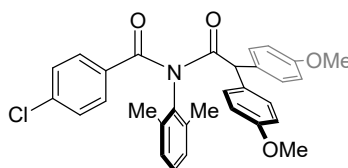

**3ca**  
C<sub>31</sub>H<sub>28</sub>ClNO<sub>4</sub>  
M = 514.02 g/mol

***N*-(2,2-bis(4-methoxyphenyl)acetyl)-4-chloro-*N*-(2,6-dimethylphenyl)benzamide (3ca):**

Prepared from 2-isocyano-1,3-dimethylbenzene (**2a**, 39.4 mg, 0.3 mmol) and bis(4-methoxyphenyl)methyl 4-chlorobenzoate (**1c**, 91.9 mg, 0.2 mmol) at 100 °C for 12 h according to the **GP**. Purification by flash chromatography on silica gel using petroleum ether/EtOAc (20/1 to 10/1) afforded **3ca** as a white solid (88.3 mg, 86% yield); mp 134–136 °C.

**3ca**:  $R_f$  = 0.40 (petroleum ether/EtOAc = 10/1). **<sup>1</sup>H NMR** (400 MHz, CDCl<sub>3</sub>): δ 7.48 (d,  $J$  = 7.2 Hz, 2H), 7.33 (d,  $J$  = 7.6 Hz, 2H), 7.29–7.25 (m, 1H), 7.16 (d,  $J$  = 7.6 Hz, 2H), 7.12 (d,  $J$  = 7.6 Hz, 4H), 6.82 (d,  $J$  = 7.6 Hz, 4H), 4.78 (s, 1H), 3.77 (s, 6H), 2.00 (s, 6H) ppm. **<sup>13</sup>C NMR** (100 MHz, CDCl<sub>3</sub>): δ 175.5, 171.5, 159.0, 137.8, 137.0, 136.8,

134.3, 130.4, 129.8, 129.4, 129.3, 129.1, 128.5, 114.0, 55.3, 55.2, 18.3 ppm. **HRMS** (ESI)  $m/z$ :  $[M+Na]^+$  calcd. for  $C_{31}H_{28}BrNO_4$ : 536.1599; Found: 536.1610.

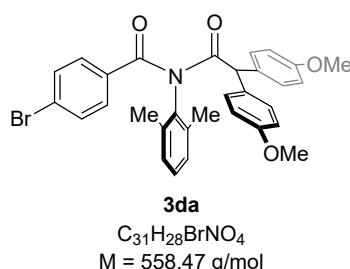

***N*-(2,2-bis(4-methoxyphenyl)acetyl)-4-bromo-*N*-(2,6-dimethylphenyl)benzamide (3da):**

Prepared from 2-isocyano-1,3-dimethylbenzene (**2a**, 39.4 mg, 0.3 mmol) and bis(4-methoxyphenyl)methyl 4-bromobenzoate (**1d**, 85.5 mg, 0.2 mmol) at 100 °C for 12 h according to the **GP**. Purification by flash chromatography on silica gel using petroleum ether/EtOAc (20/1 to 10/1) afforded **3da** as a yellow oil (88.0 mg, 79% yield).

**3da**:  $R_f$  = 0.40 (petroleum ether/EtOAc = 10/1).  **$^1H$  NMR** (400 MHz,  $CDCl_3$ ):  $\delta$  7.49 (d,  $J$  = 4.2 Hz, 2H), 7.40 (d,  $J$  = 4.4 Hz, 2H), 7.30–7.26 (m, 1H), 7.15 (d,  $J$  = 7.6 Hz, 2H), 7.12 (d,  $J$  = 8.4 Hz, 4H), 6.81 (d,  $J$  = 8.4 Hz, 4H), 4.78 (s, 1H), 3.76 (s, 6H), 1.99 (s, 6H) ppm.  **$^{13}C$  NMR** (100 MHz,  $CDCl_3$ ):  $\delta$  175.5, 171.6, 158.9, 136.9, 136.7, 134.8, 131.4, 130.3, 129.8, 129.5, 129.4, 129.1, 126.3, 113.9, 55.24, 55.16, 18.3 ppm. **HRMS** (ESI)  $m/z$ :  $[M+Na]^+$  calcd. for  $C_{31}H_{28}BrNNaO_4$ : 580.1094; Found: 580.1092.

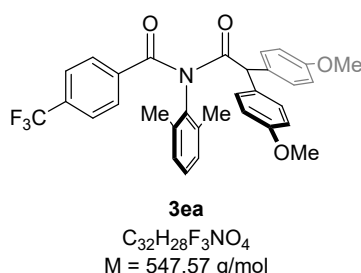

***N*-(2,2-bis(4-methoxyphenyl)acetyl)-*N*-(2,6-dimethylphenyl)-4-(trifluoromethyl)benzamide (3ea):**

Prepared from 2-isocyano-1,3-dimethylbenzene (**2a**, 39.4 mg, 0.3 mmol) and bis(4-methoxyphenyl)methyl 4-(trifluoromethyl)benzoate (**1e**, 83.3 mg, 0.2 mmol) at 100 °C for 12 h according to the **GP**. Purification by flash chromatography on silica

gel using petroleum ether/EtOAc (20/1 to 10/1) afforded **3ea** as a yellow oil (90.5 mg, 83% yield).

**3ea**:  $R_f$  = 0.35 (petroleum ether/EtOAc = 10/1).  $^1\text{H NMR}$  (400 MHz,  $\text{CDCl}_3$ ):  $\delta$  7.63 (s, 4H), 7.33–7.29 (m, 1H), 7.18 (d,  $J$  = 7.6 Hz, 2H), 7.09 (d,  $J$  = 8.4 Hz, 4H), 6.82 (d,  $J$  = 8.4 Hz, 4H), 4.76 (s, 1H), 3.77 (s, 6H), 2.01 (s, 6H) ppm.  $^{13}\text{C NMR}$  (100 MHz,  $\text{CDCl}_3$ ):  $\delta$  175.5, 171.3, 159.0, 139.5, 136.9, 136.4, 132.8 (q,  $J$  = 32.2 Hz), 130.0, 129.8, 129.5, 129.2, 127.9, 125.2 (q,  $J$  = 3.6 Hz), 123.6 (q,  $J$  = 271.1 Hz), 114.0, 55.2, 55.1, 18.2 ppm.  $^{19}\text{F NMR}$  (376 MHz,  $\text{CDCl}_3$ )  $\delta$  -62.91 (s) ppm. **HRMS** (ESI)  $m/z$ :  $[\text{M}+\text{Na}]^+$  calcd. for  $\text{C}_{32}\text{H}_{28}\text{F}_3\text{NNaO}_4$ : 570.1863; Found: 570.1864.

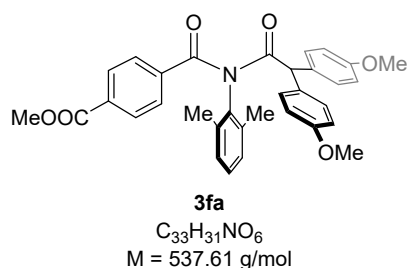

**Methyl 4-((2,2-bis(4-methoxyphenyl)acetyl)(2,6-dimethylphenyl)carbamoyl)benzoate** (**3fa**: Prepared from 2-isocyano-1,3-dimethylbenzene (**2a**, 39.4 mg, 0.3 mmol) and bis(4-methoxyphenyl)methyl methyl terephthalate (**1f**, 81.3 mg, 0.2 mmol) at 100 °C for 12 h according to the **GP**. Purification by flash chromatography on silica gel using petroleum ether/EtOAc (20/1 to 10/1) afforded **3fa** as a yellow oil (83.9 mg, 78% yield).

**3fa**:  $R_f$  = 0.30 (petroleum ether/EtOAc = 10/1).  $^1\text{H NMR}$  (400 MHz,  $\text{CDCl}_3$ ):  $\delta$  8.04 (d,  $J$  = 8.0 Hz, 2H), 7.58 (d,  $J$  = 8.4 Hz, 2H), 7.32–7.28 (m, 1H), 7.17 (d,  $J$  = 7.6 Hz, 2H), 7.09 (d,  $J$  = 8.4 Hz, 4H), 6.81 (d,  $J$  = 8.4 Hz, 4H), 4.78 (s, 1H), 3.94 (s, 3H), 3.77 (s, 6H), 2.01 (s, 6H) ppm.  $^{13}\text{C NMR}$  (100 MHz,  $\text{CDCl}_3$ ):  $\delta$  175.4, 171.8, 166.2, 159.0, 140.2, 136.9, 136.5, 132.3, 130.1, 129.8, 129.4, 129.2, 127.5, 114.0, 55.2, 55.1, 52.3, 18.3 ppm. **HRMS** (ESI)  $m/z$ :  $[\text{M}+\text{Na}]^+$  calcd. for  $\text{C}_{33}\text{H}_{31}\text{NNO}_6$ : 560.2044; Found: 560.2044.

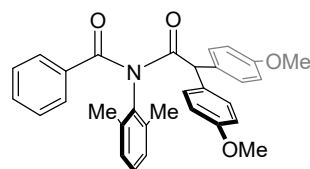**3ga**

$C_{31}H_{29}NO_4$   
M = 479.58 g/mol

***N*-(2,2-bis(4-methoxyphenyl)acetyl)-*N*-(2,6-dimethylphenyl)benzamide (3ga):**

Prepared from 2-isocyano-1,3-dimethylbenzene (**2a**, 39.4 mg, 0.3 mmol) and bis(4-methoxyphenyl)methyl benzoate (**1a**, 69.7 mg, 0.2 mmol) at 100 °C for 12 h according to the **GP**. Purification by flash chromatography on silica gel using petroleum ether/EtOAc (20/1 to 10/1) afforded **3ga** as a yellow oil (83.6 mg, 87% yield).

**3ga**:  $R_f$  = 0.45 (petroleum ether/EtOAc = 10/1). **<sup>1</sup>H NMR** (400 MHz,  $CDCl_3$ ):  $\delta$  7.56 (d,  $J$  = 7.2 Hz, 2H), 7.48–7.45 (m, 1H), 7.36–7.33 (m, 2H), 7.28–7.25 (m, 1H), 7.14 (d,  $J$  = 8.0 Hz, 6H), 6.81 (d,  $J$  = 7.2 Hz, 4H), 4.83 (s, 1H), 3.76 (s, 6H), 2.02 (s, 6H) ppm. **<sup>13</sup>C NMR** (100 MHz,  $CDCl_3$ ):  $\delta$  175.4, 172.5, 158.8, 136.98, 136.96, 135.9, 131.5, 130.5, 129.8, 129.2, 129.0, 128.1, 127.9, 113.8, 55.2, 18.3 ppm. **HRMS** (ESI)  $m/z$ :  $[M+Na]^+$  calcd. for  $C_{31}H_{29}NNaO_4$ : 502.1989; Found: 502.1989.

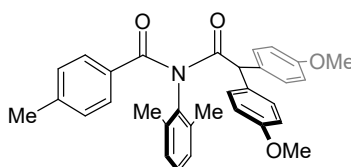**3ha**

$C_{32}H_{31}NO_4$   
M = 493.60 g/mol

***N*-(2,2-bis(4-methoxyphenyl)acetyl)-*N*-(2,6-dimethylphenyl)-4-methylbenzamide (3ha):**

Prepared from 2-isocyano-1,3-dimethylbenzene (**2a**, 39.4 mg, 0.3 mmol) and bis(4-methoxyphenyl)methyl 4-methylbenzoate (**1h**, 72.5 mg, 0.2 mmol) at 100 °C for 12 h according to the **GP**. Purification by flash chromatography on silica gel using petroleum ether/EtOAc (20/1 to 10/1) afforded **3ha** as a white solid (75.9 mg, 77% yield); mp 162–164 °C.

**3ha**:  $R_f = 0.40$  (petroleum ether/EtOAc = 10/1).  **$^1\text{H NMR}$**  (400 MHz,  $\text{CDCl}_3$ ):  $\delta$  7.47 (d,  $J = 8.0$  Hz, 2H), 7.26 – 7.24 (m, 1H), 7.16 – 7.12 (m, 8H), 6.81 (d,  $J = 8.8$  Hz, 4H), 4.83 (s, 1H), 3.76 (s, 6H), 2.37 (s, 3H), 2.01 (s, 6H) ppm.  **$^{13}\text{C NMR}$**  (100 MHz,  $\text{CDCl}_3$ ):  $\delta$  175.5, 172.4, 158.8, 142.3, 137.2, 137.1, 132.9, 130.7, 129.8, 129.1, 129.0, 128.8, 128.3, 113.8, 55.3, 55.2, 21.6, 18.3 ppm. **HRMS** (ESI)  $m/z$ :  $[\text{M}+\text{Na}]^+$  calcd. for  $\text{C}_{32}\text{H}_{31}\text{NNaO}_4$ : 516.2145; Found: 516.2144.

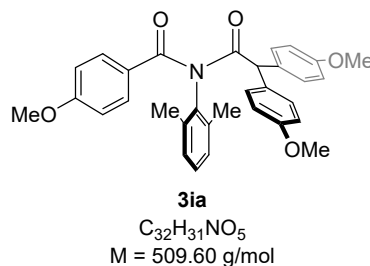

#### ***N*-(2,2-bis(4-methoxyphenyl)acetyl)-*N*-(2,6-dimethylphenyl)-4-methoxybenzamide**

**(3ia)**: Prepared from 2-isocyano-1,3-dimethylbenzene (**2a**, 39.4 mg, 0.3 mmol) and bis(4-methoxyphenyl)methyl 4-methoxybenzoate (**1i**, 75.7 mg, 0.2 mmol) at 100 °C for 12 h according to the **GP**. Purification by flash chromatography on silica gel using petroleum ether/EtOAc (20/1 to 10/1) afforded **3ia** as a yellow oil (68.6 mg, 67% yield).

**3ia**:  $R_f = 0.30$  (petroleum ether/EtOAc = 10/1).  **$^1\text{H NMR}$**  (400 MHz,  $\text{CDCl}_3$ ):  $\delta$  7.56 (d,  $J = 8.8$  Hz, 2H), 7.27–7.23 (m, 1H), 7.17 (d,  $J = 8.4$  Hz, 4H), 7.12 (d,  $J = 7.6$  Hz, 2H), 6.81 (d,  $J = 8.4$  Hz, 6H), 4.86 (s, 1H), 3.83 (s, 3H), 3.77 (s, 6H), 2.00 (s, 6H) ppm.  **$^{13}\text{C NMR}$**  (100 MHz,  $\text{CDCl}_3$ ):  $\delta$  175.6, 171.8, 162.5, 158.8, 137.4, 137.1, 130.9, 130.7, 129.8, 129.03, 129.00, 127.7, 113.9, 113.4, 55.4, 55.3, 55.2, 18.4 ppm. **HRMS** (ESI)  $m/z$ :  $[\text{M}+\text{Na}]^+$  calcd. for  $\text{C}_{32}\text{H}_{31}\text{NNaO}_5$ : 532.2094; Found: 532.2094.

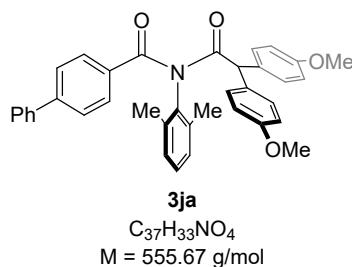

***N*-(2,2-bis(4-methoxyphenyl)acetyl)-*N*-(2,6-dimethylphenyl)-[1,1'-biphenyl]-4-carboxamide (3ja**: Prepared from 2-isocyno-1,3-dimethylbenzene (**2a**, 39.4 mg, 0.3 mmol) and bis(4-methoxyphenyl)methyl [1,1'-biphenyl]-4-carboxylate (**1j**, 84.9 mg, 0.2 mmol) at 100 °C for 12 h according to the **GP**. Purification by flash chromatography on silica gel using petroleum ether/EtOAc (20/1 to 10/1) afforded **3ja** as a white solid (77.8 mg, 70% yield); mp 78–80 °C.

**3ja**:  $R_f$  = 0.40 (petroleum ether/EtOAc = 10/1). **<sup>1</sup>H NMR** (400 MHz, CDCl<sub>3</sub>): δ 7.65 (d,  $J$  = 8.0 Hz, 2H), 7.61–7.56 (m, 4H), 7.47–7.44 (m, 2H), 7.40–7.36 (m, 1H), 7.30–7.26 (m, 1H), 7.16 (d,  $J$  = 8.4 Hz, 6H), 6.82 (d,  $J$  = 8.8 Hz, 4H), 4.84 (s, 1H), 3.77 (s, 6H), 2.04 (s, 6H) ppm. **<sup>13</sup>C NMR** (100 MHz, CDCl<sub>3</sub>): δ 175.5, 172.3, 158.9, 144.5, 140.1, 137.1, 134.5, 130.6, 129.8, 129.2, 129.1, 128.8, 128.7, 127.9, 127.3, 126.9, 113.9, 55.3, 55.2, 18.4 ppm. **HRMS** (ESI)  $m/z$ : [M+Na]<sup>+</sup> calcd. for C<sub>37</sub>H<sub>33</sub>NNaO<sub>4</sub>: 578.2302; Found: 578.2302.

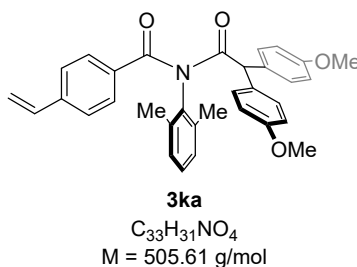

***N*-(2,2-bis(4-methoxyphenyl)acetyl)-*N*-(2,6-dimethylphenyl)-4-vinylbenzamide (3ka**: Prepared from 2-isocyno-1,3-dimethylbenzene (**2a**, 39.4 mg, 0.3 mmol) and bis(4-methoxyphenyl)methyl 4-vinylbenzoate (**1k**, 74.9 mg, 0.2 mmol) at 100 °C for 12 h according to the **GP**. Purification by flash chromatography on silica gel using petroleum ether/EtOAc (20/1 to 10/1) afforded **3ka** as a white solid (64.7 mg, 64% yield); mp 123–125 °C.

**3ka**:  $R_f$  = 0.40 (petroleum ether/EtOAc = 10/1). **<sup>1</sup>H NMR** (400 MHz, CDCl<sub>3</sub>): δ 7.53 (d,  $J$  = 8.0 Hz, 2H), 7.37 (d,  $J$  = 8.4 Hz, 2H), 7.26 (t,  $J$  = 7.6 Hz, 1H), 7.16–7.13 (m, 6H), 6.81 (d,  $J$  = 8.8 Hz, 4H), 6.71 (dd,  $J$  = 17.6, 11.2 Hz, 1H), 5.81 (d,  $J$  = 17.6 Hz, 1H), 5.34 (d,  $J$  = 10.8 Hz, 1H), 4.83 (s, 1H), 3.76 (s, 6H), 2.01 (s, 6H) ppm. **<sup>13</sup>C NMR** (100

MHz, CDCl<sub>3</sub>):  $\delta$  175.5, 172.1, 158.9, 140.8, 137.1, 137.0, 136.0, 139.4, 130.6, 129.8, 129.2, 129.0, 128.5, 125.9, 116.1, 113.9, 55.3, 55.2, 18.3 ppm. **HRMS** (ESI)  $m/z$ : [M+Na]<sup>+</sup> calcd. for C<sub>33</sub>H<sub>31</sub>NNaO<sub>4</sub>: 528.2145; Found: 528.2145.

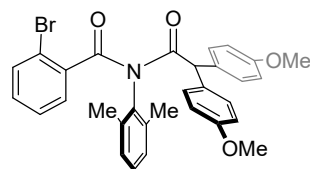**3la**

C<sub>31</sub>H<sub>28</sub>BrNO<sub>4</sub>  
M = 558.47 g/mol

***N*-(2,2-bis(4-methoxyphenyl)acetyl)-2-bromo-*N*-(2,6-dimethylphenyl)benzamide (3la:**

Prepared from 2-isocyano-1,3-dimethylbenzene (**2a**, 39.4 mg, 0.3 mmol) and bis(4-methoxyphenyl)methyl 2-bromobenzoate (**11**, 85.5 mg, 0.2 mmol) at 100 °C for 12 h according to the **GP**. Purification by flash chromatography on silica gel using petroleum ether/EtOAc (20/1 to 10/1) afforded **3la** as a white solid (100.5 mg, 90% yield); mp 134–136 °C.

**3la**:  $R_f$  = 0.30 (petroleum ether/EtOAc = 10/1). **<sup>1</sup>H NMR** (400 MHz, CDCl<sub>3</sub>):  $\delta$  7.61 (d,  $J$  = 78.0 Hz, 1H), 7.33–7.29 (m, 2H), 7.28–7.23 (m, 1H), 7.18 (d,  $J$  = 7.6 Hz, 2H), 7.14–7.12 (m, 1H), 6.93 (d,  $J$  = 8.4 Hz, 4H), 6.76 (d,  $J$  = 8.8 Hz, 4H), 4.65 (s, 1H), 3.75 (s, 6H), 2.03 (s, 6H) ppm. **<sup>13</sup>C NMR** (100 MHz, CDCl<sub>3</sub>):  $\delta$  173.9, 169.3, 158.9, 140.3, 137.0, 135.7, 133.0, 130.1, 129.9, 129.8, 129.4, 129.1, 126.8, 125.8, 119.2, 113.9, 55.3, 55.2, 18.1 ppm. **HRMS** (ESI)  $m/z$ : [M+Na]<sup>+</sup> calcd. for C<sub>31</sub>H<sub>28</sub>BrNNaO<sub>4</sub>: 580.1094; Found: 580.1094.

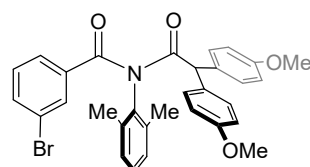**3ma**

C<sub>31</sub>H<sub>28</sub>BrNO<sub>4</sub>  
M = 558.47 g/mol

***N*-(2,2-bis(4-methoxyphenyl)acetyl)-3-bromo-*N*-(2,6-dimethylphenyl)benzamide (3ma:**

Prepared from 2-isocyano-1,3-dimethylbenzene (**2a**, 39.4 mg, 0.3 mmol) and bis(4-

methoxyphenyl)methyl 3-bromobenzoate (**1m**, 85.5 mg, 0.2 mmol) at 100 °C for 12 h according to the **GP**. Purification by flash chromatography on silica gel using petroleum ether/EtOAc (10/1 to 5/1) afforded **3ma** as a yellow oil (89.4 mg, 80% yield).

**3ma**:  $R_f$  = 0.40 (petroleum ether/EtOAc = 10/1).  **$^1\text{H NMR}$**  (400 MHz,  $\text{CDCl}_3$ ):  $\delta$  7.66 (s, 1H), 7.60 (d,  $J$  = 8.0 Hz, 1H), 7.49 (d,  $J$  = 7.6 Hz, 1H), 7.31–7.23 (m, 2H), 7.17 (d,  $J$  = 7.6 Hz, 2H), 7.09 (d,  $J$  = 8.8 Hz, 4H), 6.83 (d,  $J$  = 8.4 Hz, 4H), 4.74 (s, 1H), 3.76 (s, 6H), 1.99 (s, 6H) ppm.  **$^{13}\text{C NMR}$**  (100 MHz,  $\text{CDCl}_3$ ):  $\delta$  175.5, 171.1, 158.9, 137.9, 136.9, 136.6, 134.3, 130.4, 130.0, 129.84, 129.78, 129.4, 129.2, 126.4, 122.0, 114.1, 55.2, 55.1, 18.3 ppm. **HRMS** (ESI)  $m/z$ :  $[\text{M}+\text{Na}]^+$  calcd. for  $\text{C}_{31}\text{H}_{28}\text{BrNNaO}_4$ : 580.1094; Found: 580.1094.

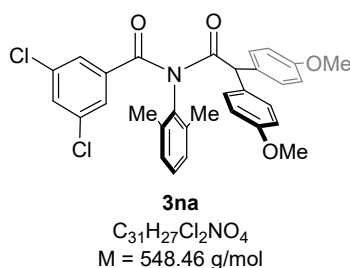

### ***N*-(2,2-bis(4-methoxyphenyl)acetyl)-3,5-dichloro-*N*-(2,6-dimethylphenyl)benzamide**

**3na**: Prepared from 2-isocyno-1,3-dimethylbenzene (**2a**, 39.4 mg, 0.3 mmol) and bis(4-methoxyphenyl)methyl 3,5-dichlorobenzoate (**1n**, 83.5 mg, 0.2 mmol) at 100 °C for 12 h according to the **GP**. Purification by flash chromatography on silica gel using petroleum ether/EtOAc (10/1 to 5/1) afforded **3na** as a white solid (104.2 mg, 95% yield); mp 132–134 °C.

**3na**:  $R_f$  = 0.30 (petroleum ether/EtOAc = 10/1).  **$^1\text{H NMR}$**  (400 MHz,  $\text{CDCl}_3$ ):  $\delta$  7.46 (s, 1H), 7.40 (s, 2H), 7.33–7.30 (m, 1H), 7.19 (d,  $J$  = 7.6 Hz, 2H), 7.07 (d,  $J$  = 8.8 Hz, 4H), 6.84 (d,  $J$  = 8.4 Hz, 4H), 4.69 (s, 1H), 3.77 (s, 6H), 1.98 (s, 6H) ppm.  **$^{13}\text{C NMR}$**  (100 MHz,  $\text{CDCl}_3$ ):  $\delta$  175.6, 170.1, 159.0, 138.8, 136.9, 136.3, 135.0, 131.2, 129.8, 129.7, 129.6, 129.3, 125.9, 114.2, 55.3, 55.1, 18.2 ppm. **HRMS** (ESI)  $m/z$ :  $[\text{M}+\text{Na}]^+$  calcd. for  $\text{C}_{31}\text{H}_{27}\text{Cl}_2\text{NNaO}_4$ : 570.1209; Found: 570.1206.



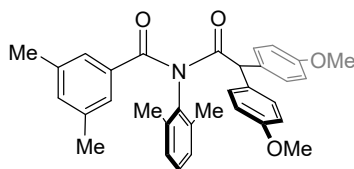**3oa**

$C_{33}H_{33}NO_4$   
M = 507.63 g/mol

***N*-(2,2-bis(4-methoxyphenyl)acetyl)-*N*-(2,6-dimethylphenyl)-3,5-dimethylbenzamide**

**3oa**: Prepared from 2-isocyano-1,3-dimethylbenzene (**2a**, 39.4 mg, 0.3 mmol) and bis(4-methoxyphenyl)methyl 3,5-dimethylbenzoate (**1o**, 75.3 mg, 0.2 mmol) at 100 °C for 12 h according to the **GP**. Purification by flash chromatography on silica gel using petroleum ether/EtOAc (20/1 to 10/1) afforded **3oa** as a white solid (81.2 mg, 80% yield); mp 134–136 °C.

**3oa**:  $R_f$  = 0.40 (petroleum ether/EtOAc = 10/1). **<sup>1</sup>H NMR** (400 MHz,  $CDCl_3$ ):  $\delta$  7.29–7.24 (m, 1H), 7.17–7.10 (m, 9H), 6.80 (d,  $J$  = 8.8 Hz, 4H), 4.75 (s, 1H), 3.76 (s, 6H), 2.27 (s, 6H), 2.02 (s, 6H) ppm. **<sup>13</sup>C NMR** (100 MHz,  $CDCl_3$ ):  $\delta$  175.5, 172.8, 158.8, 137.7, 137.1, 137.1, 135.7, 133.4, 130.7, 129.8, 129.2, 129.1, 125.7, 113.9, 55.23, 55.20, 21.2, 18.4 ppm. **HRMS** (ESI)  $m/z$ :  $[M+Na]^+$  calcd. for  $C_{33}H_{33}NNaO_4$ : 530.2302; Found: 530.2304.

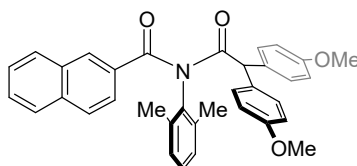**3pa**

$C_{35}H_{31}NO_4$   
M = 529.64 g/mol

***N*-(2,2-bis(4-methoxyphenyl)acetyl)-*N*-(2,6-dimethylphenyl)-1-naphthamide** (**3pa**:

Prepared from 2-isocyano-1,3-dimethylbenzene (**2a**, 39.4 mg, 0.3 mmol) and bis(4-methoxyphenyl)methyl 1-naphthoate (**1p**, 79.7 mg, 0.2 mmol) at 100 °C for 12 h according to the **GP**. Purification by flash chromatography on silica gel using petroleum ether/EtOAc (20/1 to 10/1) afforded **3pa** as a white solid (98.5 mg, 93% yield); mp 124–126 °C.

**3pa:**  $R_f$  = 0.40 (petroleum ether/EtOAc = 10/1).  **$^1\text{H NMR}$**  (400 MHz,  $\text{CDCl}_3$ ):  $\delta$  8.06 (s, 1H), 7.85–7.80 (m, 2H), 7.75 (d,  $J$  = 8.0 Hz, 1H), 7.63 (d,  $J$  = 8.8 Hz, 1H), 7.56–7.48 (m, 2H), 7.31–7.27 (m, 1H), 7.18–7.15 (m, 6H), 6.82 (d,  $J$  = 8.0 Hz, 4H), 4.84 (s, 1H), 3.78 (s, 6H), 2.08 (s, 6H) ppm.  **$^{13}\text{C NMR}$**  (100 MHz,  $\text{CDCl}_3$ ):  $\delta$  175.6, 172.6, 158.9, 137.1, 134.8, 133.1, 132.4, 130.6, 129.8, 129.3, 129.1, 129.0, 128.8, 127.9, 127.8, 127.7, 126.5, 124.5, 113.9, 55.3, 55.2, 18.4 ppm. **HRMS** (ESI)  $m/z$ :  $[\text{M}+\text{Na}]^+$  calcd. for  $\text{C}_{35}\text{H}_{31}\text{NNaO}_4$ : 552.2145; Found: 552.2144.

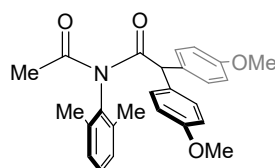

**3qa**  
 $\text{C}_{26}\text{H}_{27}\text{NO}_4$   
 $M = 417.51 \text{ g/mol}$

***N*-acetyl-*N*-(2,6-dimethylphenyl)-2,2-bis(4-methoxyphenyl)acetamide (3qa:** Prepared from 2-isocyno-1,3-dimethylbenzene (**2a**, 39.4 mg, 0.3 mmol) and bis(4-methoxyphenyl)methyl acetate (**1q**, 57.3 mg, 0.2 mmol) at 100 °C for 12 h according to the **GP**. Purification by flash chromatography on silica gel using petroleum ether/EtOAc (20/1 to 10/1) afforded **3qa** as a colorless oil (66.0 mg, 79% yield).

**3qa:**  $R_f$  = 0.45 (petroleum ether/EtOAc = 10/1).  **$^1\text{H NMR}$**  (400 MHz,  $\text{CDCl}_3$ ):  $\delta$  7.25–7.21 (m, 1H), 7.10 (d,  $J$  = 7.6 Hz, 2H), 7.07 (d,  $J$  = 8.8 Hz, 4H), 6.81 (d,  $J$  = 8.8 Hz, 4H), 4.97 (s, 1H), 3.76 (s, 6H), 2.49 (s, 3H), 1.86 (s, 6H) ppm.  **$^{13}\text{C NMR}$**  (100 MHz,  $\text{CDCl}_3$ ):  $\delta$  175.1, 173.0, 158.8, 136.9, 136.4, 130.5, 129.8, 129.0, 128.8, 113.9, 55.7, 55.2, 26.8, 17.7 ppm. **HRMS** (ESI)  $m/z$ :  $[\text{M}+\text{Na}]^+$  calcd. for  $\text{C}_{26}\text{H}_{27}\text{NNaO}_4$ : 440.1832; Found: 440.1830.

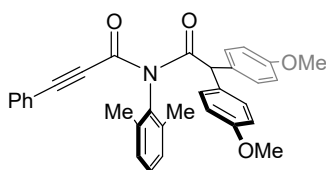

**3ra**  
 $\text{C}_{33}\text{H}_{29}\text{NO}_4$   
 $M = 503.60 \text{ g/mol}$

***N*-(2,2-bis(4-methoxyphenyl)acetyl)-*N*-(2,6-dimethylphenyl)-3-phenylpropiolamide**

**3ra**: Prepared from 2-isocyano-1,3-dimethylbenzene (**2a**, 39.4 mg, 0.3 mmol) and bis(4-methoxyphenyl)methyl 3-phenylpropiolate (**1r**, 74.5 mg, 0.2 mmol) at 100 °C for 12 h according to the **GP**. Purification by flash chromatography on silica gel using petroleum ether/EtOAc (20/1 to 10/1) afforded **3ra** as a yellow oil (28.2 mg, 28% yield).

**3ra**:  $R_f$  = 0.40 (petroleum ether/EtOAc = 10/1). **<sup>1</sup>H NMR** (400 MHz, CDCl<sub>3</sub>): δ 7.39–7.35 (m, 1H), 7.28–7.24 (m, 7H), 7.15–7.12 (m, 4H), 6.85 (d,  $J$  = 8.8 Hz, 4H), 6.03 (s, 1H), 3.77 (s, 6H), 2.03 (s, 6H) ppm. **<sup>13</sup>C NMR** (100 MHz, CDCl<sub>3</sub>): δ 174.1, 158.7, 154.3, 137.0, 136.6, 133.3, 130.83, 130.79, 130.2, 129.2, 128.6, 128.4, 119.5, 113.9, 93.3, 82.5, 56.1, 55.2, 17.8 ppm. **HRMS** (ESI)  $m/z$ : [M+Na]<sup>+</sup> calcd. for C<sub>33</sub>H<sub>29</sub>NNaO<sub>4</sub>: 526.1989; Found: 529.1986.

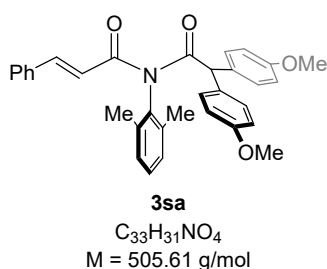***N*-(2,2-bis(4-methoxyphenyl)acetyl)-*N*-(2,6-dimethylphenyl)cinnamamide (**3sa**:**

Prepared from 2-isocyano-1,3-dimethylbenzene (**2a**, 39.4 mg, 0.3 mmol) and bis(4-methoxyphenyl)methyl cinnamate (**1s**, 74.9 mg, 0.2 mmol) at 100 °C for 12 h according to the **GP**. Purification by flash chromatography on silica gel using petroleum ether/EtOAc (10/1 to 5/1) afforded **3sa** as a white solid (51.6 mg, 51% yield); mp 148–150 °C.

**3sa**:  $R_f$  = 0.35 (petroleum ether/EtOAc = 10/1). **<sup>1</sup>H NMR** (400 MHz, CDCl<sub>3</sub>): δ 7.79 (d,  $J$  = 15.6 Hz, 1H), 7.45–7.43 (m, 2H), 7.34–7.33 (m, 3H), 7.23 (d,  $J$  = 8.0 Hz, 1H), 7.18 (d,  $J$  = 8.0 Hz, 4H), 7.12 (d,  $J$  = 7.2 Hz, 2H), 6.94 (d,  $J$  = 14.8 Hz, 1H), 6.87 (d,  $J$  = 8.8 Hz, 4H), 5.42 (s, 1H), 3.77 (s, 6H), 1.93 (s, 6H) ppm. **<sup>13</sup>C NMR** (100 MHz, CDCl<sub>3</sub>): δ 175.5, 168.1, 158.7, 145.2, 136.6, 134.6, 131.0, 130.4, 129.9, 129.0,

128.81, 128.77, 128.3, 119.8, 113.9, 55.9, 55.2, 17.9 ppm. **HRMS** (ESI)  $m/z$ :  $[M+Na]^+$  calcd. for  $C_{33}H_{31}NNaO_4$ : 528.2145; Found: 528.2141.

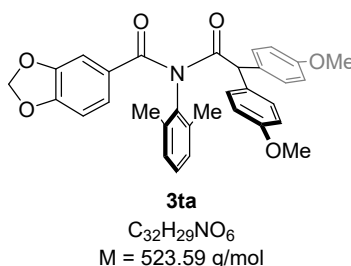

***N*-(2,2-bis(4-methoxyphenyl)acetyl)-*N*-(2,6-dimethylphenyl)benzo[d][1,3]dioxole-5-**

**carboxamide (3ta)**: Prepared from 2-isocyano-1,3-dimethylbenzene (**2a**, 39.4 mg, 0.3 mmol) and bis(4-methoxyphenyl)methyl benzo[d][1,3]dioxole-5-carboxylate (**1t**, 78.5 mg, 0.2 mmol) at 100 °C for 12 h according to the **GP**. Purification by flash chromatography on silica gel using petroleum ether/EtOAc (5/1) afforded **3ta** as a yellow oil (92.2 mg, 88% yield).

**3ta**:  $R_f = 0.35$  (petroleum ether/EtOAc = 5/1).  **$^1H$  NMR** (400 MHz,  $CDCl_3$ ):  $\delta$  7.28–7.24 (m, 1H), 7.18–7.12 (m, 7H), 7.04 (s, 1H), 6.81 (d,  $J = 8.4$  Hz, 4H), 6.74 (d,  $J = 8.0$  Hz, 1H), 5.99 (s, 2H), 4.80 (s, 1H), 3.76 (s, 6H), 2.00 (s, 6H) ppm.  **$^{13}C$  NMR** (100 MHz,  $CDCl_3$ ):  $\delta$  175.6, 171.5, 158.8, 150.8, 147.5, 137.3, 137.0, 130.6, 129.8, 129.5, 129.1, 129.0, 124.0, 113.9, 108.7, 107.8, 101.7, 55.3, 55.2, 18.4 ppm. **HRMS** (ESI)  $m/z$ :  $[M+Na]^+$  calcd. for  $C_{32}H_{29}NNaO_6$ : 546.1893; Found: 546.1880.

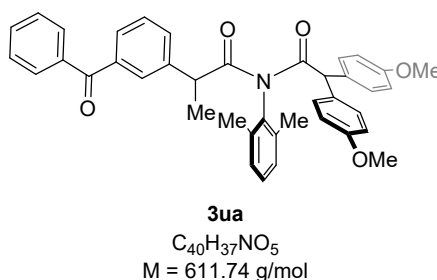

**2-(3-benzoylphenyl)-*N*-(2,2-bis(4-methoxyphenyl)acetyl)-*N*-(2,6-dimethylphenyl)**

**propanamide (3ua)**: Prepared from 2-isocyano-1,3-dimethylbenzene (**2a**, 39.4 mg, 0.3 mmol) and bis(4-methoxyphenyl)methyl 2-(3-benzoylphenyl)propanoate (**1u**, 96.1 mg, 0.2 mmol) at 100 °C for 12 h according to the **GP**. Purification by flash

chromatography on silica gel using petroleum ether/EtOAc (5/1) afforded **3ua** as a yellow oil (121.0 mg, 99% yield).

**3ua**:  $R_f$  = 0.40 (petroleum ether/EtOAc = 5/1).  $^1\text{H NMR}$  (400 MHz,  $\text{CDCl}_3$ ):  $\delta$  7.75 (d,  $J$  = 8.0 Hz, 2H), 7.68 (d,  $J$  = 7.2 Hz, 1H), 7.60–7.55 (m, 2H), 7.47–7.43 (m, 3H), 7.39–7.36 (m, 1H), 7.19–7.16 (m, 1H), 7.09–6.99 (m, 4H), 6.91 (d,  $J$  = 8.0 Hz, 2H), 6.81 (d,  $J$  = 8.8 Hz, 2H), 6.69 (d,  $J$  = 8.4 Hz, 2H), 5.13 (s, 1H), 4.60 (s, 1H), 3.75 (s, 3H), 3.69 (s, 3H), 1.65 (s, 3H), 1.63 (s, 3H), 1.52 (d,  $J$  = 6.8 Hz, 3H) ppm.  $^{13}\text{C NMR}$  (100 MHz,  $\text{CDCl}_3$ ):  $\delta$  196.1, 176.6, 175.3, 158.7, 158.6, 140.6, 137.7, 137.4, 136.9, 136.41, 136.39, 132.4, 132.1, 130.7, 130.6, 130.0, 129.90, 129.87, 129.7, 128.9, 128.8, 128.3, 128.2, 113.80, 113.77, 55.9, 55.13, 55.08, 46.7, 20.3, 17.6 ppm.

**HRMS** (ESI)  $m/z$ :  $[\text{M}+\text{Na}]^+$  calcd. for  $\text{C}_{40}\text{H}_{37}\text{NNaO}_5$ : 634.2570; Found: 634.2553.

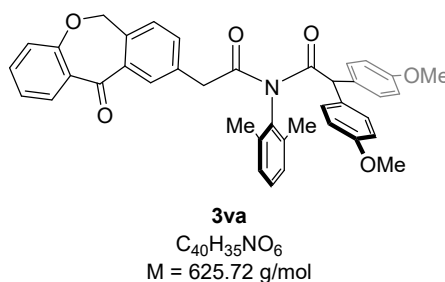

***N*-(2,6-dimethylphenyl)-2,2-bis(4-methoxyphenyl)-*N*-(2-(11-oxo-6,11-dihydrodibenzo [b,e]oxepin-9-yl)acetyl)acetamide (3va)**: Prepared from 2-isocyano-1,3-dimethylbenzene (**2a**, 39.4 mg, 0.3 mmol) and bis(4-methoxyphenyl)methyl 2-(11-oxo-6,11-dihydrodibenzo[b,e]oxepin-9-yl)acetate (**1v**, 98.9 mg, 0.2 mmol) at 100 °C for 12 h according to the **GP**. Purification by flash chromatography on silica gel using petroleum ether/EtOAc (5/1) afforded **3va** as a yellow oil (118.8 mg, 95% yield).

**3va**:  $R_f$  = 0.40 (petroleum ether/EtOAc = 5/1).  $^1\text{H NMR}$  (400 MHz,  $\text{CDCl}_3$ ):  $\delta$  8.02 (s, 1H), 7.87 (d,  $J$  = 7.6 Hz, 1H), 7.56–7.52 (m, 1H), 7.47–7.44 (m, 1H), 7.37–7.33 (m, 2H), 7.24–7.20 (m, 1H), 7.09–7.04 (m, 6H), 6.98 (d,  $J$  = 8.4 Hz, 1H), 6.78 (d,  $J$  = 8.8 Hz, 4H), 5.16 (s, 2H), 5.08 (s, 1H), 4.13 (s, 2H), 3.73 (s, 6H), 1.83 (s, 6H) ppm.  $^{13}\text{C NMR}$  (100 MHz,  $\text{CDCl}_3$ ):  $\delta$  190.6, 175.1, 173.6, 160.4, 158.7, 140.4, 137.0, 136.54, 136.46, 135.5, 132.8, 132.7, 130.5, 129.8, 129.4, 129.2, 129.0, 128.9, 127.8, 127.7,

124.9, 120.7, 113.8, 73.6, 55.7, 55.2, 43.9, 17.8 ppm. **HRMS** (ESI)  $m/z$ :  $[M+Na]^+$  calcd. for  $C_{40}H_{35}NNaO_6$ : 648.2362; Found: 648.2351.

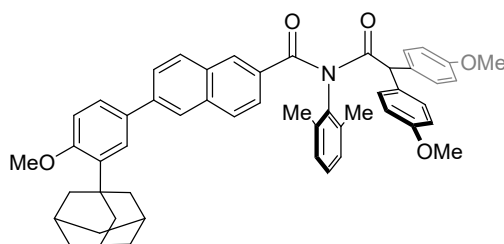

**3wa**  
 $C_{52}H_{51}NO_5$   
 M = 769.98 g/mol

**6-(3-(Adamantan-1-yl)-4-methoxyphenyl)-N-(2,2-bis(4-methoxyphenyl)acetyl)-N-(2,6-dimethylphenyl)-2-naphthamide (3wa):** Prepared from 2-isocyano-1,3-dimethylbenzene (**2a**, 39.4 mg, 0.3 mmol) and bis(4-methoxyphenyl)methyl 6-(3-(adamantan-1-yl)-4-methoxyphenyl)-2-naphthoate (**1w**, 127.8 mg, 0.2 mmol) at 100 °C for 12 h according to the **GP**. Purification by flash chromatography on silica gel using petroleum ether/EtOAc (5/1) afforded **3wa** as a yellow oil (95.5 mg, 62% yield).

**3wa:**  $R_f$  = 0.30 (petroleum ether/EtOAc = 5/1). **<sup>1</sup>H NMR** (400 MHz,  $CDCl_3$ ):  $\delta$  8.06 (s, 1H), 7.98 (s, 1H), 7.84 (d,  $J$  = 8.8 Hz, 1H), 7.79–7.74 (m, 2H), 7.64 (d,  $J$  = 8.4 Hz, 1H), 7.60 (s, 1H), 7.54 (d,  $J$  = 8.4 Hz, 1H), 7.29 (t,  $J$  = 7.6 Hz, 1H), 7.19–7.16 (m, 6H), 6.99 (d,  $J$  = 8.4 Hz, 1H), 6.83 (d,  $J$  = 8.4 Hz, 4H), 4.87 (s, 1H), 3.89 (s, 3H), 3.78 (s, 6H), 2.19 (s, 6H), 2.09 (s, 9H), 1.81 (s, 6H) ppm. **<sup>13</sup>C NMR** (100 MHz,  $CDCl_3$ ):  $\delta$  175.6, 172.6, 158.9, 158.8, 140.9, 138.9, 137.2, 137.1, 135.2, 132.6, 132.5, 131.1, 130.7, 129.8, 129.4, 129.2, 129.1, 128.8, 128.0, 126.3, 125.9, 125.7, 125.0, 124.7, 113.9, 112.1, 55.31, 55.26, 55.1, 40.6, 37.2, 37.1, 29.1, 18.5 ppm. **HRMS** (ESI)  $m/z$ :  $[M+Na]^+$  calcd. for  $C_{52}H_{51}NNaO_5$ : 792.3665; Found: 792.3654.

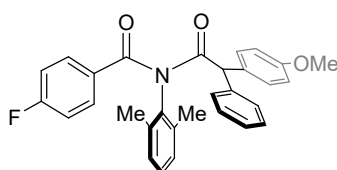

**3xa**  
 $C_{30}H_{26}FNO_3$   
 M = 467.54 g/mol

***N*-(2,6-dimethylphenyl)-4-fluoro-*N*-(2-(4-methoxyphenyl)-2-phenylacetyl)benzamide**

**3xa**): Prepared from 2-isocyno-1,3-dimethylbenzene (**2a**, 39.4 mg, 0.3 mmol) and (4-methoxyphenyl)(phenyl)methyl 4-fluorobenzoate (**1x**, 67.3 mg, 0.2 mmol) at 100 °C for 20 h according to the **GP**. Purification by flash chromatography on silica gel using petroleum ether/EtOAc (20/1 to 10/1) afforded **3xa** as a yellow oil (45.8 mg, 49% yield).

**3xa**:  $R_f$  = 0.40 (petroleum ether/EtOAc = 15/1). **<sup>1</sup>H NMR** (400 MHz, CDCl<sub>3</sub>): δ 7.58–7.55 (m, 2H), 7.30–7.21 (m, 6H), 7.15 (d,  $J$  = 8.0 Hz, 4H), 7.04–7.00 (m, 2H), 6.82 (d,  $J$  = 8.4 Hz, 2H), 4.86 (s, 1H), 3.77 (s, 3H), 2.00 (s, 6H) ppm. **<sup>13</sup>C NMR** (100 MHz, CDCl<sub>3</sub>): δ 175.3, 171.3, 164.7 (d,  $J$  = 251.4 Hz), 138.3, 137.0, 136.9, 131.9 (d,  $J$  = 3.1 Hz), 130.6 (d,  $J$  = 8.9 Hz), 130.0, 129.9, 129.3, 129.1, 128.7, 128.6, 127.5, 115.3 (d,  $J$  = 21.9 Hz), 114.0, 56.1, 55.2, 18.3 ppm. **<sup>19</sup>F NMR** (376 MHz, CDCl<sub>3</sub>) δ -106.99 (s) ppm. **HRMS** (ESI)  $m/z$ : [M+Na]<sup>+</sup> calcd. for C<sub>30</sub>H<sub>26</sub>FNNaO<sub>3</sub>: 490.1789; Found: 490.1785.

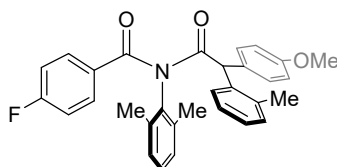

**3ya**  
C<sub>31</sub>H<sub>28</sub>FNO<sub>3</sub>  
M = 481.57 g/mol

***N*-(2,6-dimethylphenyl)-4-fluoro-*N*-(2-(4-methoxyphenyl)-2-(*o*-tolyl)acetyl)benzamide**

**3ya**): Prepared from 2-isocyno-1,3-dimethylbenzene (**2a**, 39.4 mg, 0.3 mmol) and (4-methoxyphenyl)(*o*-tolyl)methyl 4-fluorobenzoate (**1y**, 70.1 mg, 0.2 mmol) at 100 °C for 18 h according to the **GP**. Purification by flash chromatography on silica gel using petroleum ether/EtOAc (20/1 to 10/1) afforded **3ya** as a yellow oil (54.9 mg, 57% yield).

**3ya**:  $R_f$  = 0.35 (petroleum ether/EtOAc = 15/1). **<sup>1</sup>H NMR** (400 MHz, CDCl<sub>3</sub>): δ 7.71 (d,  $J$  = 7.6 Hz, 1H), 7.65–7.61 (m, 2H), 7.33–7.19 (m, 4H), 7.11–7.04 (m, 6H), 6.78 (d,  $J$  = 8.4 Hz, 2H), 5.12 (s, 1H), 3.72 (s, 3H), 2.32 (s, 3H), 1.63 (s, 6H) ppm. **<sup>13</sup>C NMR**

(100 MHz, CDCl<sub>3</sub>):  $\delta$  175.4, 171.5, 164.6 (d,  $J$  = 251.1 Hz), 158.7, 137.12, 137.08, 136.9, 135.5, 132.4 (d,  $J$  = 3.2 Hz), 131.0, 130.4 (d,  $J$  = 8.9 Hz), 130.2, 129.4, 129.32, 129.30, 129.1, 127.7, 127.6, 126.2, 115.3 (d,  $J$  = 22.0 Hz), 113.7, 55.2, 51.6, 18.74, 18.67, 17.6 ppm. **<sup>19</sup>F NMR** (376 MHz, CDCl<sub>3</sub>)  $\delta$  -107.28 (s) ppm. **HRMS** (ESI)  $m/z$ : [M+Na]<sup>+</sup> calcd. for C<sub>31</sub>H<sub>28</sub>FNNaO<sub>3</sub>: 504.1945; Found: 504.1940.

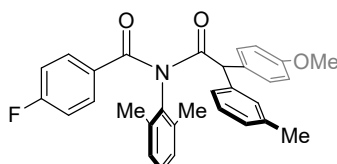

**3za**  
C<sub>31</sub>H<sub>28</sub>FNO<sub>3</sub>  
M = 481.57 g/mol

***N*-(2,6-dimethylphenyl)-4-fluoro-*N*-(2-(4-methoxyphenyl)-2-(*m*-tolyl)acetyl)benzamide**

**(3za)**: Prepared from 2-isocyano-1,3-dimethylbenzene (**2a**, 39.4 mg, 0.3 mmol) and (4-methoxyphenyl)(*m*-tolyl)methyl 4-fluorobenzoate (**1z**, 70.1 mg, 0.2 mmol) at 100 °C for 18 h according to the **GP**. Purification by flash chromatography on silica gel using petroleum ether/EtOAc (20/1 to 10/1) afforded **3za** as a yellow oil (53.0 mg, 55% yield).

**3za**:  $R_f$  = 0.40 (petroleum ether/EtOAc = 15/1). **<sup>1</sup>H NMR** (400 MHz, CDCl<sub>3</sub>):  $\delta$  7.59–7.55 (m, 2H), 7.30–7.27 (m, 1H), 7.17–7.14 (m, 5H), 7.07–6.98 (m, 5H), 6.82 (d,  $J$  = 8.4 Hz, 2H), 4.81 (s, 1H), 3.77 (s, 3H), 2.30 (s, 3H), 2.02 (s, 3H), 1.96 (s, 3H) ppm. **<sup>13</sup>C NMR** (100 MHz, CDCl<sub>3</sub>):  $\delta$  175.34, 171.37, 164.7 (d,  $J$  = 251.5 Hz), 159.0, 138.3, 138.1, 137.04, 137.02, 136.9, 132.0 (d,  $J$  = 3.3 Hz), 130.6 (d,  $J$  = 8.9 Hz), 130.1, 129.9, 129.4, 129.3, 129.11, 129.09, 128.5, 128.2, 125.79, 115.3 (d,  $J$  = 22.0 Hz), 113.9, 56.0, 55.2, 21.4, 18.3, 18.2 ppm. **<sup>19</sup>F NMR** (376 MHz, CDCl<sub>3</sub>)  $\delta$  -107.06 (s) ppm. **HRMS** (ESI)  $m/z$ : [M+Na]<sup>+</sup> calcd. for C<sub>31</sub>H<sub>28</sub>FNNaO<sub>3</sub>: 504.1945; Found: 504.1944.



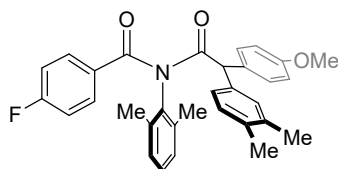**3aa-a**

$C_{32}H_{30}FNO_3$   
M = 495.59 g/mol

**N-(2,6-dimethylphenyl)-N-(2-(3,4-dimethylphenyl)-2-(4-methoxyphenyl)acetyl)-4-fluorobenzamide (3aa-a):** Prepared from 2-isocyano-1,3-dimethylbenzene (**2a**, 39.4 mg, 0.3 mmol) and (3,4-dimethylphenyl)(4-methoxyphenyl)methyl 4-fluorobenzoate (**1aa**, 72.9 mg, 0.2 mmol) at 100 °C for 18 h according to the **GP**. Purification by flash chromatography on silica gel using petroleum ether/EtOAc (20/1 to 10/1) afforded **3aa-a** as a yellow oil (87.2 mg, 88% yield).

**3aa-a:**  $R_f$  = 0.40 (petroleum ether/EtOAc = 15/1).  **$^1H$  NMR** (400 MHz,  $CDCl_3$ ):  $\delta$  7.59–7.56 (m, 2H), 7.30–7.26 (m, 1H), 7.16–7.13 (m, 4H), 7.05–6.98 (m, 4H), 6.92 (d,  $J$  = 7.7 Hz, 1H), 6.80 (d,  $J$  = 7.6 Hz, 2H), 4.77 (s, 1H), 3.76 (s, 3H), 2.21 (s, 6H), 2.02 (s, 3H), 1.97 (s, 3H) ppm.  **$^{13}C$  NMR** (100 MHz,  $CDCl_3$ ):  $\delta$  175.5, 171.4, 164.6 (d,  $J$  = 251.2 Hz), 158.9, 137.05, 137.00, 136.8, 135.8, 135.5, 132.0 (d,  $J$  = 3.3 Hz), 130.6 (d,  $J$  = 9.0 Hz), 130.4, 129.83, 129.79, 129.3, 129.08, 129.07, 126.1, 115.3 (d,  $J$  = 21.9 Hz), 113.9, 55.7, 55.2, 19.8, 19.3, 18.34, 18.29 ppm.  **$^{19}F$  NMR** (376 MHz,  $CDCl_3$ )  $\delta$  -107.14 (s) ppm. **HRMS** (ESI)  $m/z$ :  $[M+Na]^+$  calcd. for  $C_{32}H_{30}FNNaO_3$ : 518.2102; Found: 518.2100.

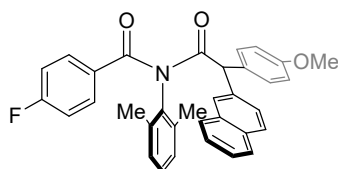**3ab-a**

$C_{34}H_{28}FNO_3$   
M = 517.60 g/mol

**N-(2,6-dimethylphenyl)-4-fluoro-N-(2-(4-methoxyphenyl)-2-(naphthalen-2-yl)acetyl)benzamide (3ab-a):** Prepared from 2-isocyano-1,3-dimethylbenzene (**2a**, 39.4 mg, 0.3 mmol) and (4-methoxyphenyl)(naphthalen-2-yl)methyl 4-fluorobenzoate (**1ab**, 77.3 mg, 0.2 mmol) at 100 °C for 20 h according to the **GP**. Purification by flash

chromatography on silica gel using petroleum ether/EtOAc (20/1 to 10/1) afforded **3ab-a** as a yellow oil (62.1 mg, 60% yield).

**3ab-a**:  $R_f = 0.40$  (petroleum ether/EtOAc = 15/1).  **$^1\text{H NMR}$**  (400 MHz,  $\text{CDCl}_3$ ):  $\delta$  7.80–7.75 (m, 3H), 7.68 (s, 1H), 7.60–7.56 (m, 2H), 7.47–7.45 (m, 2H), 7.36–7.28 (m, 2H), 7.24–7.13 (m, 4H), 7.04–7.00 (m, 2H), 6.83 (d,  $J = 8.8$  Hz, 2H), 5.05 (s, 1H), 3.76 (s, 3H), 2.05 (s, 3H), 1.94 (s, 3H) ppm.  **$^{13}\text{C NMR}$**  (100 MHz,  $\text{CDCl}_3$ ):  $\delta$  175.3, 171.3, 164.7 (d,  $J = 251.5$  Hz), 159.0, 137.1, 137.0, 136.9, 135.7, 133.3, 132.6, 131.9 (d,  $J = 3.2$  Hz), 130.6 (d,  $J = 9.0$  Hz), 130.04, 129.97, 129.4, 129.19, 129.16, 128.4, 127.9, 127.6, 127.4, 126.7, 126.3, 126.1, 115.3 (d,  $J = 22.0$  Hz), 114.0, 56.1, 55.2, 18.4, 18.3 ppm.  **$^{19}\text{F NMR}$**  (376 MHz,  $\text{CDCl}_3$ )  $\delta$  -106.88 (s) ppm. **HRMS** (ESI)  $m/z$ :  $[\text{M}+\text{Na}]^+$  calcd. for  $\text{C}_{34}\text{H}_{28}\text{FNNaO}_3$ : 540.1945; Found: 540.1942.

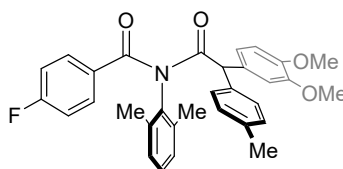

**3ac-a**  
 $\text{C}_{32}\text{H}_{30}\text{FNO}_4$   
 $M = 511.59$  g/mol

***N*-(2-(3,4-dimethoxyphenyl)-2-(*p*-tolyl)acetyl)-*N*-(2,6-dimethylphenyl)-4-fluorobenzamide (**3ac-a**):**

Prepared from 2-isocyano-1,3-dimethylbenzene (**2a**, 39.4 mg, 0.3 mmol) and (3,4-dimethoxyphenyl)(*p*-tolyl)methyl 4-fluorobenzoate (**1ac**, 76.1 mg, 0.2 mmol) at 100 °C for 20 h according to the **GP**. Purification by flash chromatography on silica gel using petroleum ether/EtOAc (20/1 to 10/1) afforded **3ac-a** as a white solid (60.4 mg, 59% yield); mp 100–102 °C.

**3ac-a**:  $R_f = 0.45$  (petroleum ether/EtOAc = 10/1).  **$^1\text{H NMR}$**  (400 MHz,  $\text{CDCl}_3$ ):  $\delta$  7.60–7.56 (m, 2H), 7.30–7.27 (m, 1H), 7.18 (d,  $J = 7.6$  Hz, 1H), 7.14–7.08 (m, 5H), 7.05–7.00 (m, 2H), 6.79–6.72 (m, 3H), 4.81 (s, 1H), 3.85 (s, 3H), 3.79 (s, 3H), 2.31 (s, 3H), 2.08 (s, 3H), 1.95 (s, 3H) ppm.  **$^{13}\text{C NMR}$**  (100 MHz,  $\text{CDCl}_3$ ):  $\delta$  175.3, 171.3, 164.7 (d,  $J = 251.5$  Hz), 148.9, 148.4, 137.2, 137.2, 137.0, 135.3, 131.9 (d,  $J = 3.2$  Hz), 130.6 (d,  $J = 9.0$  Hz), 130.4, 129.3, 129.2, 129.14, 129.07, 128.5, 121.1, 115.3 (d,  $J = 22.0$

Hz), 111.8, 110.9, 56.0, 55.85, 55.79, 21.0, 18.4, 18.3 ppm. **<sup>19</sup>F NMR** (376 MHz, CDCl<sub>3</sub>) δ -106.97 (s) ppm. **HRMS** (ESI) *m/z*: [M+Na]<sup>+</sup> calcd. for C<sub>32</sub>H<sub>30</sub>FNNaO<sub>4</sub>: 534.2051; Found: 534.2044.

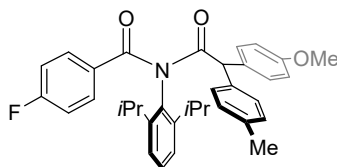

**3ab**  
C<sub>35</sub>H<sub>36</sub>FNO<sub>3</sub>  
M = 537.68 g/mol

***N*-(2,6-diisopropylphenyl)-4-fluoro-*N*-(2-(4-methoxyphenyl)-2-(*p*-tolyl)acetyl)benzamide (3ab):**

Prepared from 2-isocyano-1,3-diisopropylbenzene (**2b**, 56.2 mg, 0.3 mmol) and (4-methoxyphenyl)(*p*-tolyl)methyl 4-fluorobenzoate (**1a**, 70.1 mg, 0.2 mmol) at 100 °C for 16 h according to the **GP**. Purification by flash chromatography on silica gel using petroleum ether/EtOAc (20/1 to 10/1) afforded **3ab** as a yellow oil (91.4 mg, 85% yield).

**3ab**: *R<sub>f</sub>* = 0.40 (petroleum ether/EtOAc = 15/1). **<sup>1</sup>H NMR** (400 MHz, CDCl<sub>3</sub>): δ 7.53–7.50 (m, 2H), 7.43–7.39 (m, 1H), 7.24–7.15 (m, 6H), 7.06 (d, *J* = 8.0 Hz, 2H), 6.99–6.95 (m, 2H), 6.78 (d, *J* = 8.4 Hz, 2H), 5.08 (s, 1H), 3.74 (s, 3H), 2.94–2.83 (m, 2H), 2.28 (s, 3H), 1.02 (d, *J* = 6.8 Hz, 6H), 0.92 (d, *J* = 7.6 Hz, 3H), 0.91 (d, *J* = 7.2 Hz, 3H) ppm. **<sup>13</sup>C NMR** (100 MHz, CDCl<sub>3</sub>): δ 176.4, 171.9, 164.5 (d, *J* = 251.2 Hz), 158.8, 147.1, 147.0, 136.9, 136.2, 133.5, 131.8 (d, *J* = 2.8 Hz), 131.3, 130.6 (d, *J* = 8.9 Hz), 130.0, 129.6, 129.2, 128.2, 124.5, 115.2 (d, *J* = 21.9 Hz), 113.9, 56.0, 55.2, 28.8, 24.6, 23.1, 23.0, 21.0 ppm. **<sup>19</sup>F NMR** (376 MHz, CDCl<sub>3</sub>) δ -107.23 (s) ppm. **HRMS** (ESI) *m/z*: [M+Na]<sup>+</sup> calcd. for C<sub>35</sub>H<sub>36</sub>FNNaO<sub>3</sub>: 560.2571; Found: 560.2570.

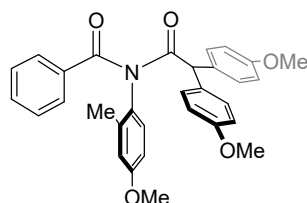

**3gc**  
C<sub>31</sub>H<sub>29</sub>NO<sub>5</sub>  
M = 495.58 g/mol

***N*-(2,2-bis(4-methoxyphenyl)acetyl)-*N*-(4-methoxy-2-methylphenyl)benzamide (3gc:**

Prepared from 1-isocyano-4-methoxy-2-methylbenzene (**2c**, 44.2 mg, 0.3 mmol) and bis(4-methoxyphenyl)methyl benzoate (**1g**, 69.7 mg, 0.2 mmol) at 100 °C for 16 h according to the **GP**. Purification by flash chromatography on silica gel using petroleum ether/EtOAc (20/1 to 10/1) afforded **3gc** as a yellow oil (36.7 mg, 37% yield).

**3gc**:  $R_f$  = 0.30 (petroleum ether/EtOAc = 10/1). **<sup>1</sup>H NMR** (400 MHz, CDCl<sub>3</sub>): δ 7.48 (d,  $J$  = 7.2 Hz, 2H), 7.44–7.41 (m, 1H), 7.31–7.28 (m, 2H), 7.19–7.14 (m, 4H), 6.92 (d,  $J$  = 8.4 Hz, 1H), 6.85–6.81 (m, 5H), 6.74 (d,  $J$  = 8.4 Hz, 1H), 5.13 (s, 1H), 3.81 (s, 3H), 3.78 (s, 3H), 3.77 (s, 3H), 2.05 (s, 3H) ppm. **<sup>13</sup>C NMR** (100 MHz, CDCl<sub>3</sub>): δ 176.0, 173.3, 159.7, 158.9, 158.7, 137.9, 135.6, 131.7, 130.8, 130.6, 130.6, 130.4, 130.0, 129.8, 128.13, 128.09, 116.5, 113.9, 113.8, 112.3, 55.43, 55.38, 55.25, 55.23, 18.3 ppm. **HRMS** (ESI)  $m/z$ : [M+Na]<sup>+</sup> calcd. for C<sub>31</sub>H<sub>29</sub>NNaO<sub>5</sub>: 518.1938; Found: 518.1935.

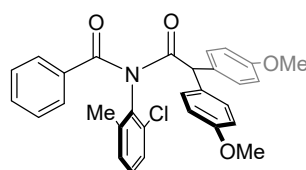

**3gd**  
C<sub>30</sub>H<sub>26</sub>ClNO<sub>4</sub>  
M = 499.99 g/mol

***N*-(2,2-bis(4-methoxyphenyl)acetyl)-*N*-(2-chloro-6-methylphenyl)benzamide (3gd:**

Prepared from 1-chloro-2-isocyano-3-methylbenzene (**2d**, 45.5 mg, 0.3 mmol) and bis(4-methoxyphenyl)methyl benzoate (**1g**, 69.7 mg, 0.2 mmol) at 100 °C for 16 h according to the **GP**. Purification by flash chromatography on silica gel using petroleum ether/EtOAc (20/1 to 10/1) afforded **3gd** as a yellow oil (72.0 mg, 72% yield).

**3gd**:  $R_f$  = 0.50 (petroleum ether/EtOAc = 10/1). **<sup>1</sup>H NMR** (400 MHz, CDCl<sub>3</sub>): δ 7.60 (d,  $J$  = 7.6 Hz, 2H), 7.46–7.42 (m, 1H), 7.38 (d,  $J$  = 8.0 Hz, 1H), 7.35–7.31 (m, 2H), 7.29–7.25 (m, 1H), 7.21 (d,  $J$  = 8.4 Hz, 2H), 7.12–7.07 (m, 3H), 6.82 (d,  $J$  = 8.8 Hz,

2H), 6.81 (d,  $J = 8.8$  Hz, 2H), 4.96 (s, 1H), 3.78 (s, 3H), 3.76 (s, 3H), 1.85 (s, 3H) ppm.  $^{13}\text{C}$  NMR (100 MHz,  $\text{CDCl}_3$ ):  $\delta$  174.9, 172.1, 159.0, 158.7, 140.1, 135.6, 135.5, 133.9, 131.7, 130.7, 130.0, 129.9, 129.7, 129.6, 128.1, 127.98, 127.96, 114.0, 113.7, 55.7, 55.3, 55.2, 18.3 ppm. **HRMS** (ESI)  $m/z$ :  $[\text{M}+\text{Na}]^+$  calcd. for  $\text{C}_{30}\text{H}_{26}\text{ClNNaO}_4$ : 522.1443; Found: 522.1443.

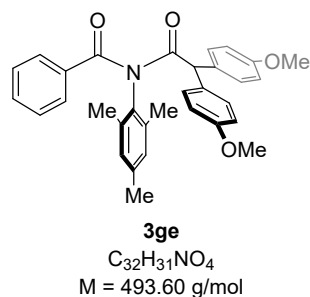

***N*-(2,2-bis(4-methoxyphenyl)acetyl)-*N*-mesitylbenzamide (3ge**: Prepared from 2-isocyno-1,3,5-trimethylbenzene (**2e**, 43.6 mg, 0.3 mmol) and bis(4-methoxyphenyl)methyl benzoate (**1g**, 69.7 mg, 0.2 mmol) at 100 °C for 12 h according to the **GP**. Purification by flash chromatography on silica gel using petroleum ether/EtOAc (20/1 to 10/1) afforded **3ge** as a white solid (85.9 mg, 87% yield); mp 125–127 °C.

**3ge**:  $R_f = 0.45$  (petroleum ether/EtOAc = 10/1).  $^1\text{H}$  NMR (400 MHz,  $\text{CDCl}_3$ ):  $\delta$  7.54 (d,  $J = 7.2$  Hz, 2H), 7.47–7.44 (m, 1H), 7.36–7.32 (m, 2H), 7.14 (d,  $J = 8.8$  Hz, 4H), 6.96 (s, 2H), 6.81 (d,  $J = 8.8$  Hz, 4H), 4.86 (s, 1H), 3.76 (s, 6H), 2.35 (s, 3H), 1.97 (s, 6H) ppm.  $^{13}\text{C}$  NMR (100 MHz,  $\text{CDCl}_3$ ):  $\delta$  175.6, 172.7, 158.8, 139.0, 136.6, 136.1, 134.4, 131.5, 130.7, 129.8, 128.1, 127.9, 113.9, 55.2, 55.1, 21.1, 18.2 ppm. **HRMS** (ESI)  $m/z$ :  $[\text{M}+\text{Na}]^+$  calcd. for  $\text{C}_{32}\text{H}_{31}\text{NNaO}_4$ : 516.2145; Found: 516.2141.

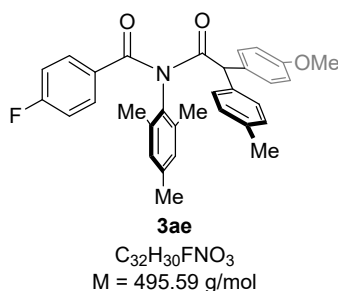

**4-Fluoro-*N*-mesityl-*N*-(2-(4-methoxyphenyl)-2-(*p*-tolyl)acetyl)benzamide (3ae):**

Prepared from 2-isocyano-1,3,5-trimethylbenzene (**2e**, 43.6 mg, 0.3 mmol) and (4-methoxyphenyl)(*p*-tolyl)methyl 4-fluorobenzoate (**1a**, 70.1 mg, 0.2 mmol) at 100 °C for 16 h according to the **GP**. Purification by flash chromatography on silica gel using petroleum ether/EtOAc (20/1 to 10/1) afforded **3ae** as a white solid (78.3 mg, 79% yield); mp 139–141 °C.

**3ae**:  $R_f = 0.40$  (petroleum ether/EtOAc = 15/1). **<sup>1</sup>H NMR** (400 MHz, CDCl<sub>3</sub>): δ 7.57–7.54 (m, 2H), 7.16–7.07 (m, 6H), 7.03–6.99 (m, 2H), 6.96 (s, 2H), 6.81 (d,  $J = 8.4$  Hz, 2H), 4.85 (s, 1H), 3.76 (s, 3H), 2.35 (s, 3H), 2.30 (s, 3H), 1.95 (s, 6H) ppm. **<sup>13</sup>C NMR** (100 MHz, CDCl<sub>3</sub>): δ 175.6, 171.5, 164.6 (d,  $J = 251.1$  Hz), 158.9, 139.1, 137.1, 136.5, 136.5, 135.4, 134.3, 132.1 (d,  $J = 3.2$  Hz), 130.5 (d,  $J = 8.8$  Hz), 130.4, 129.88, 129.86, 129.8, 129.2, 128.6, 115.2 (d,  $J = 21.9$  Hz), 113.9, 55.5, 55.2, 21.1, 21.0, 18.2 ppm. **<sup>19</sup>F NMR** (376 MHz, CDCl<sub>3</sub>) δ -107.25 (s) ppm. **HRMS** (ESI)  $m/z$ : [M+Na]<sup>+</sup> calcd. for C<sub>32</sub>H<sub>30</sub>FNNaO<sub>3</sub>: 518.2102; Found: 518.2100.

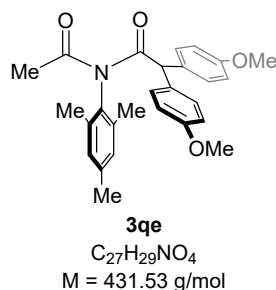

***N*-acetyl-*N*-mesityl-2,2-bis(4-methoxyphenyl)acetamide (3qe):** Prepared from 2-isocyano-1,3,5-trimethylbenzene (**2e**, 43.6 mg, 0.3 mmol) and bis(4-methoxyphenyl)methyl acetate (**1q**, 57.3 mg, 0.2 mmol) at 100 °C for 12 h according to the **GP**. Purification by flash chromatography on silica gel using petroleum ether/EtOAc (20/1 to 10/1) afforded **3qe** as a yellow oil (75.1 mg, 87% yield).

**3qe**:  $R_f = 0.4$  (petroleum ether/EtOAc = 10/1). **<sup>1</sup>H NMR** (400 MHz, CDCl<sub>3</sub>): δ 7.08 (d,  $J = 8.8$  Hz, 4H), 6.91 (s, 2H), 6.83–6.79 (m, 4H), 5.00 (s, 1H), 3.76 (s, 6H), 2.48 (s, 3H), 2.32 (s, 3H), 1.81 (s, 6H) ppm. **<sup>13</sup>C NMR** (100 MHz, CDCl<sub>3</sub>): δ 175.3, 173.1, 158.7, 138.7, 135.9, 134.2, 130.7, 129.8, 129.6, 113.9, 55.5, 55.2, 26.8, 21.1, 17.6

ppm. **HRMS** (ESI)  $m/z$ :  $[M+Na]^+$  calcd. for  $C_{27}H_{29}NNaO_4$ : 454.1989; Found: 454.1989.

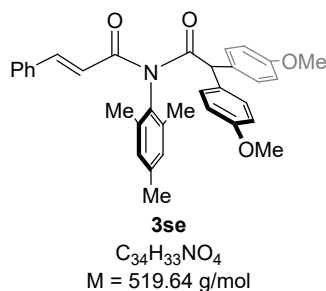

***N*-(2,2-bis(4-methoxyphenyl)acetyl)-*N*-mesitylcinnamamide (3se)**: Prepared from 2-isocyno-1,3,5-trimethylbenzene (**2e**, 43.6 mg, 0.3 mmol) and bis(4-methoxyphenyl)methyl cinnamate (**1s**, 74.9 mg, 0.2 mmol) at 100 °C for 12 h according to the **GP**. Purification by flash chromatography on silica gel using petroleum ether/EtOAc (20/1 to 10/1) afforded **3se** as a yellow oil (74.8 mg, 72% yield).

**3se**:  $R_f$  = 0.40 (petroleum ether/EtOAc = 10/1).  **$^1H$  NMR** (400 MHz,  $CDCl_3$ ):  $\delta$  7.78 (d,  $J$  = 15.6 Hz, 1H), 7.45–7.43 (m, 2H), 7.33–7.32 (m, 3H), 7.20 (d,  $J$  = 8.8 Hz, 4H), 6.92 (s, 3H), 6.85–6.81 (m, 4H), 5.44 (s, 1H), 3.75 (s, 6H), 2.32 (s, 3H), 1.88 (s, 6H) ppm.  **$^{13}C$  NMR** (100 MHz,  $CDCl_3$ ):  $\delta$  175.7, 168.2, 158.6, 145.0, 138.7, 136.1, 134.6, 133.9, 131.1, 130.3, 129.9, 129.5, 128.7, 128.3, 119.8, 113.8, 55.7, 55.1, 21.1, 17.8 ppm.

**HRMS** (ESI)  $m/z$ :  $[M+Na]^+$  calcd. for  $C_{34}H_{33}NNaO_4$ : 542.2302; Found: 542.2300.

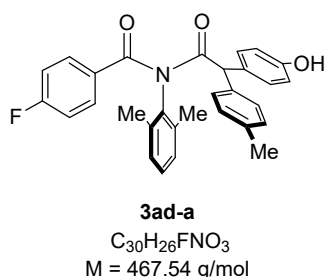

***N*-(2,6-dimethylphenyl)-4-fluoro-*N*-(2-(4-hydroxyphenyl)-2-(*p*-tolyl)acetyl)benzamide (3ad-a)**: yellow oil.  $R_f$  = 0.40 (petroleum ether/EtOAc = 2/1).  **$^1H$  NMR** (400 MHz,  $CDCl_3$ ):  $\delta$  7.58–7.54 (m, 2H), 7.28–7.25 (m, 1H), 7.13 (d,  $J$  = 7.6 Hz, 2H), 7.09 (s,

4H), 7.04–6.99 (m, 4H), 6.65–6.63 (m, 2H), 5.48 (broad s, 1H), 4.79 (s, 1H), 2.30 (s, 3H), 1.99 (s, 6H) ppm.  $^{13}\text{C}$  NMR (100 MHz,  $\text{CDCl}_3$ ):  $\delta$  175.7, 171.6, 164.7 (d,  $J = 251.0$  Hz), 155.1, 137.2, 137.0, 136.9, 136.8, 135.2, 131.8 (d,  $J = 3.2$  Hz), 130.6 (d,  $J = 8.8$  Hz), 129.9, 129.34, 129.28, 129.1, 128.5, 115.4, 115.3 (d,  $J = 21.0$  Hz), 55.7, 21.0, 18.3 ppm.  $^{19}\text{F}$  NMR (376 MHz,  $\text{CDCl}_3$ )  $\delta$  -106.76 (s) ppm. HRMS (ESI)  $m/z$ :  $[\text{M}+\text{Na}]^+$  calcd. for  $\text{C}_{30}\text{H}_{26}\text{FNNO}_3$ : 490.1789; Found: 490.1785.

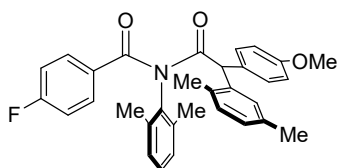

**3ae-a**  
 $\text{C}_{32}\text{H}_{30}\text{FNO}_3$   
 $M = 495.59$  g/mol

***N*-(2,6-dimethylphenyl)-*N*-(2-(2,5-dimethylphenyl)-2-(4-methoxyphenyl)acetyl)-4-fluorobenzamide (3ae-a)**: Prepared from 2-isocyano-1,3-dimethylbenzene (**2a**, 39.4 mg, 0.3 mmol) and (*R*)-(2,5-dimethylphenyl)(4-methoxyphenyl)methyl 4-fluorobenzoate ((*R*)-**1ae**, 72.9 mg, 0.2 mmol, 97% ee) at 100 °C for 20 h according to the **GP**. Purification by flash chromatography on silica gel using petroleum ether/EtOAc (20/1 to 10/1) afforded **3ae-a** as a yellow oil (28.7 mg, 29% yield, 0% ee).

**3ae-a**:  $R_f = 0.40$  (petroleum ether/EtOAc = 15/1).  $^1\text{H}$  NMR (400 MHz,  $\text{CDCl}_3$ ):  $\delta$  7.67–7.64 (m, 2H), 7.51 (s, 1H), 7.28–7.25 (m, 2H), 7.10–7.02 (m, 6H), 6.97 (d,  $J = 7.6$  Hz, 1H), 6.79–6.76 (m, 2H), 5.05 (s, 1H), 3.73 (s, 3H), 2.43 (s, 3H), 2.33 (s, 3H), 1.61 (s, 3H), 1.55 (s, 3H) ppm.  $^{13}\text{C}$  NMR (100 MHz,  $\text{CDCl}_3$ ):  $\delta$  175.6, 171.6, 164.6 (d,  $J = 250.9$  Hz), 158.7, 137.2, 137.1, 137.0, 135.7, 135.2, 133.8, 132.5 (d,  $J = 3.2$  Hz), 130.9, 130.3, 130.2, 129.3, 129.1, 128.3 (d,  $J = 6.1$  Hz), 115.3 (d,  $J = 21.9$  Hz), 113.7, 55.2, 51.5, 21.2, 18.7, 18.2, 17.6 ppm.  $^{19}\text{F}$  NMR (376 MHz,  $\text{CDCl}_3$ )  $\delta$  -107.32 (s) ppm. HRMS (ESI)  $m/z$ :  $[\text{M}+\text{Na}]^+$  calcd. for  $\text{C}_{32}\text{H}_{30}\text{FNNO}_3$ : 518.2102; Found: 518.2098.



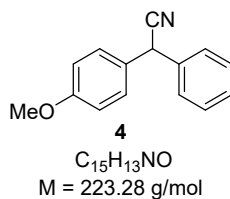

**2-(4-methoxyphenyl)-2-phenylacetonitrile (4)** [7]: white solid (42.9 mg, 96% yield); mp 130–132 °C;  $R_f$  = 0.5 (petroleum ether/EtOAc = 20/1).  **$^1H$  NMR** (400 MHz,  $CDCl_3$ ): 7.39–7.29 (m, 5H), 7.25 (d,  $J$  = 8.4 Hz, 2H), 6.88 (d,  $J$  = 8.4 Hz, 2H), 5.09 (s, 1H), 3.79 (s, 3H) ppm.  **$^{13}C$  NMR** (100 MHz,  $CDCl_3$ ):  $\delta$  159.4, 136.2, 129.1, 128.9, 128.1, 127.9, 127.6, 119.9, 114.5, 55.3, 41.8 ppm.

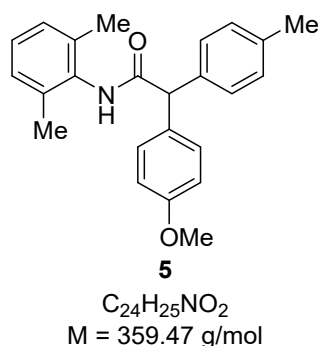

**N-(2,6-dimethylphenyl)-2-(4-methoxyphenyl)-2-(p-tolyl)acetamide (5)**: white solid; mp 197–199 °C.  $R_f$  = 0.3 (petroleum ether/EtOAc = 3/1).  **$^1H$  NMR** (400 MHz,  $CDCl_3$ ):  $\delta$  7.28–7.23 (m, 4H), 7.14 (d,  $J$  = 8.0 Hz, 2H), 7.01–6.98 (m, 3H), 6.86 (d,  $J$  = 8.4 Hz, 2H), 5.05 (s, 1H), 3.78 (s, 3H), 2.32 (s, 3H), 2.09 (s, 6H) ppm.  **$^{13}C$  NMR** (100 MHz,  $CDCl_3$ ):  $\delta$  170.6, 158.7, 136.9, 136.7, 135.2, 133.8, 131.7, 130.0, 129.4, 128.7, 128.1, 127.1, 114.1, 58.2, 55.2, 21.0, 18.5 ppm. **HRMS** (ESI)  $m/z$ :  $[M+Na]^+$  calcd. for  $C_{24}H_{25}NNaO_2$ : 382.1778; Found: 382.1776.

## 9 Crystal Structure of 3sa

CCDC number of **3sa** is 2262921. The crystallographic data can be obtained free of charge from The Cambridge Crystallographic Data Centre via [www.ccdc.cam.ac.uk/data\\_request/cif](http://www.ccdc.cam.ac.uk/data_request/cif)

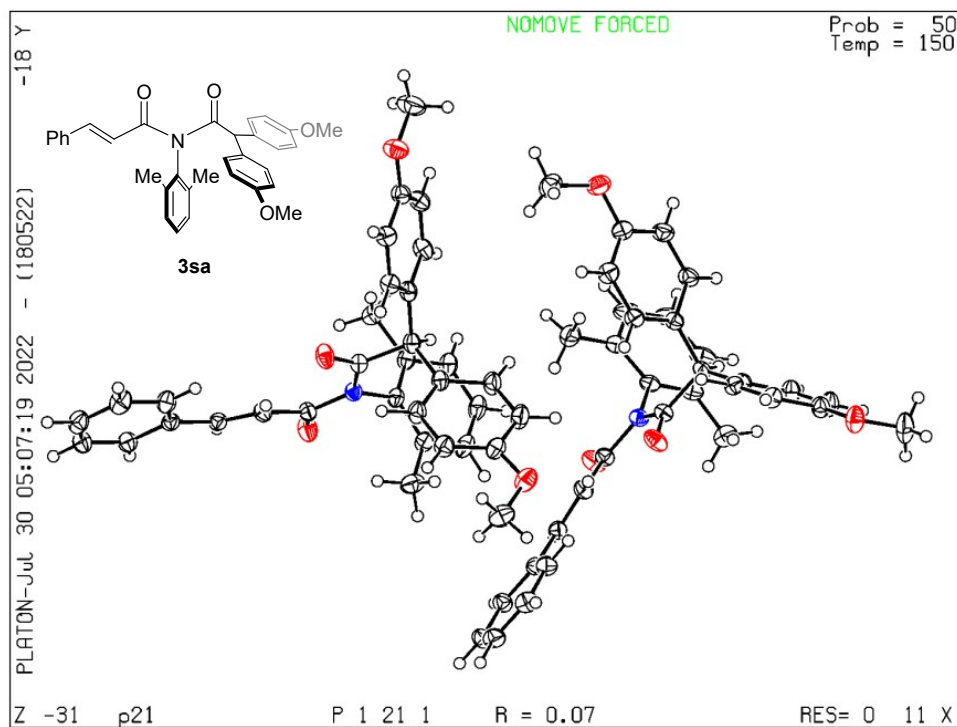

Bond precision: C-C = 0.0046 Å

Wavelength=0.71073

Cell: a=12.6134(10)

b=11.660(1)

c=19.2888(17)

alpha=90

beta=109.0800

gamma=90

Temperature: 150 K

|                        | Calculated    | Reported        |
|------------------------|---------------|-----------------|
| Volume                 | 2681.0(4)     | 2680.9(4)       |
| Space group            | P 21          | P 1 21 1        |
| Hall group             | P 2yb         | P 2yb           |
| Moiety formula         | C33 H31 N O4  | 2(C33 H31 N O4) |
| Sum formula            | C33 H31 N O4  | C66 H62 N2 O8   |
| Mr                     | 505.59        | 1011.17         |
| Dx, g cm <sup>-3</sup> | 1.253         | 1.253           |
| Z                      | 4             | 2               |
| Mu (mm <sup>-1</sup> ) | 0.082         | 0.082           |
| F000                   | 1072.0        | 1072.0          |
| F000'                  | 1072.49       |                 |
| h, k, lmax             | 19, 18, 30    | 19, 18, 30      |
| Nref                   | 21723[ 11307] | 20554           |
| Tmin, Tmax             | 0.984, 0.988  |                 |
| Tmin'                  | 0.984         |                 |

Correction method= Not given

Data completeness= 1.82/0.95

Theta(max)= 33.914

R(reflections)= 0.0666( 17178)

wR2(reflections)=  
0.2280( 20554)

S = 1.117

Npar= 693

**10 References**

- [1] A. Dasgupta, K. Stefkova, R. Babaahmadi, B. F. Yates, N. J. Buurma, A. Ariafard, E. Richards and R. L. Melen, *J. Am. Chem. Soc.*, 2021, **143**, 4451-4464.
- [2] P. Patil, M. Ahmadian-Moghaddam and A. Dömling, *Green Chem.* 2020, **22**, 6902-6911.
- [3] H. Jacobsen, H. Berke, S. Döring, G. Kehr, G. Erker, R. Fröhlich and O. Meyer, *Organometallics* 1999, **18**, 1724–1735.
- [4] B. Zhou, Y. Q. Zhang, K. Zhang, M. Y. Yang, Y. B. Chen, Y. Li, Q. Peng, S. F. Zhu, Q. L. Zhou and L. W. Ye, *Nat. Commun.*, 2019, **10**, 3234..
- [5] S. T. Nguyen, E. A. McLoughlin, J. H. Cox, B. P. Fors and R. R. Knowles, *J. Am. Chem. Soc.*, 2021, **143**, 12268-12277.
- [6] J. L. Xu, H. Tian, J. H. Kang, W. X. Kang, W. Sun, R. Sun, Y. M. Li and M. Sun, *Org. Lett.*, 2020, **22**, 6739-6743.
- [7] G. Chen, Z. Wang, J. Wu and K. Ding, *Org. Lett.*, 2008, **10**, 4573-4576.

## 11 NMR Spectra

 $^1\text{H}$  and  $^{13}\text{C}$  NMR Spectra for Compound 3aa: $^1\text{H}$  NMR (400 MHz,  $\text{CDCl}_3$ )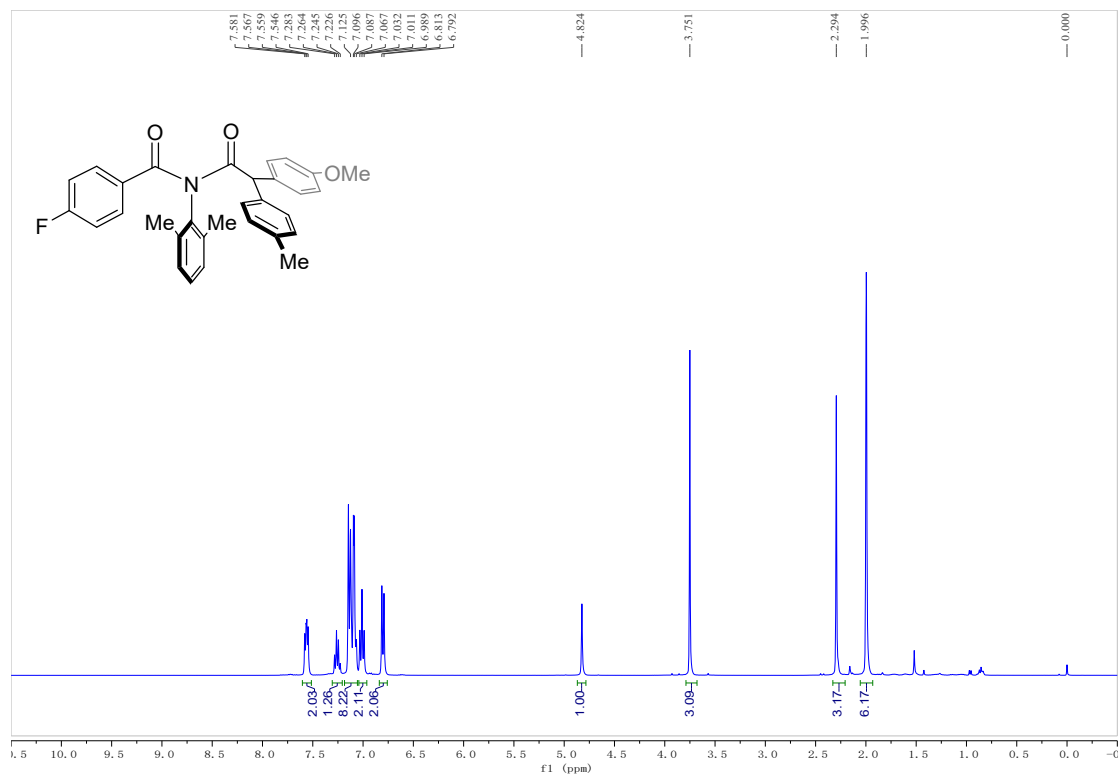 $^{13}\text{C}$  NMR (100 MHz,  $\text{CDCl}_3$ )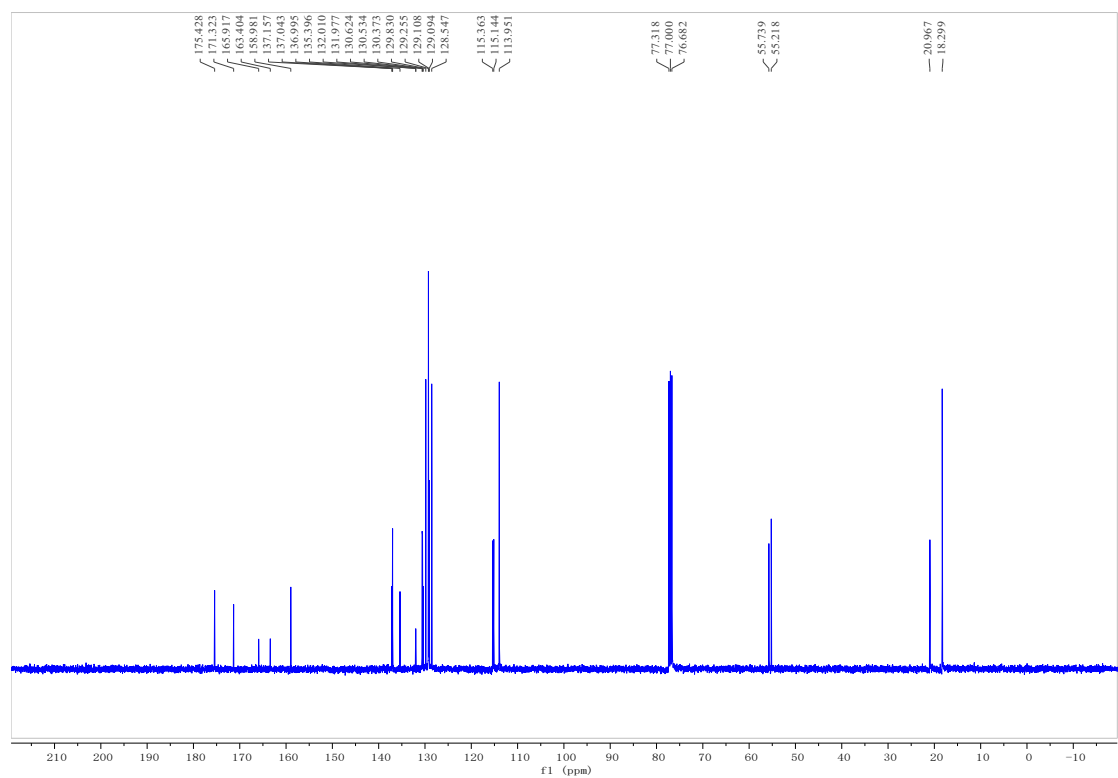

$^{19}\text{F}$  NMR (376 MHz,  $\text{CDCl}_3$ )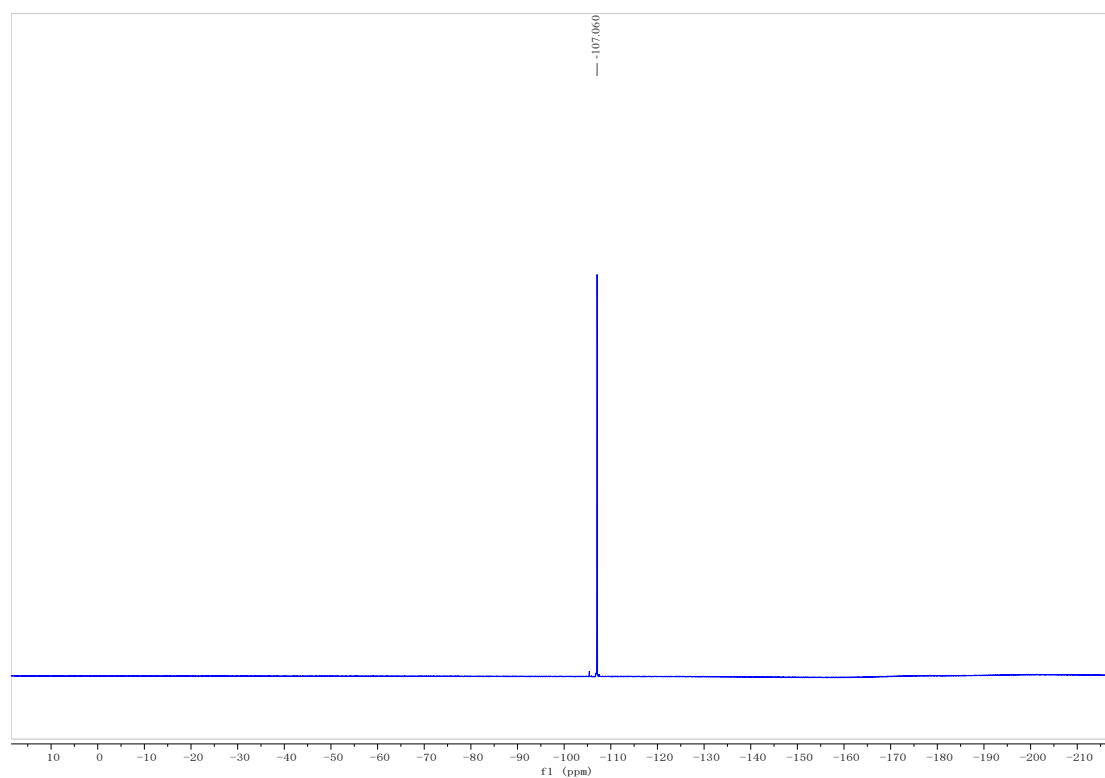 $^1\text{H}$  and  $^{13}\text{C}$  NMR Spectra for Compound 3ba: $^1\text{H}$  NMR (400 MHz,  $\text{CDCl}_3$ )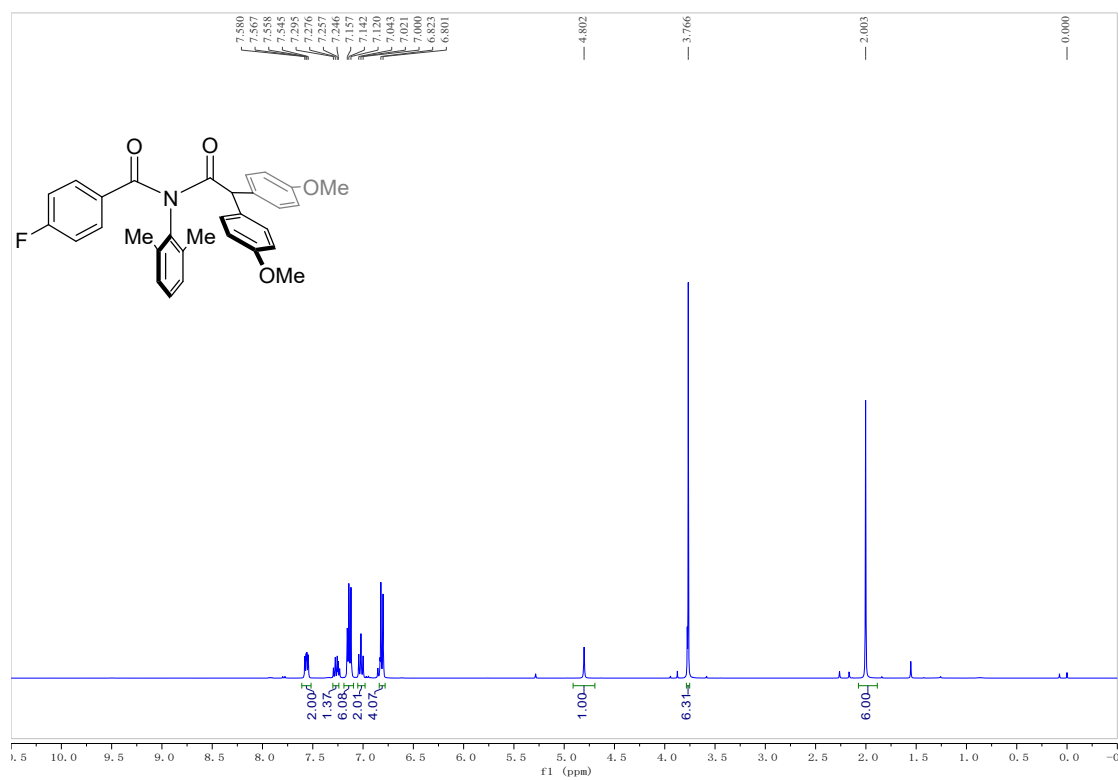

$^{13}\text{C}$  NMR (100 MHz,  $\text{CDCl}_3$ )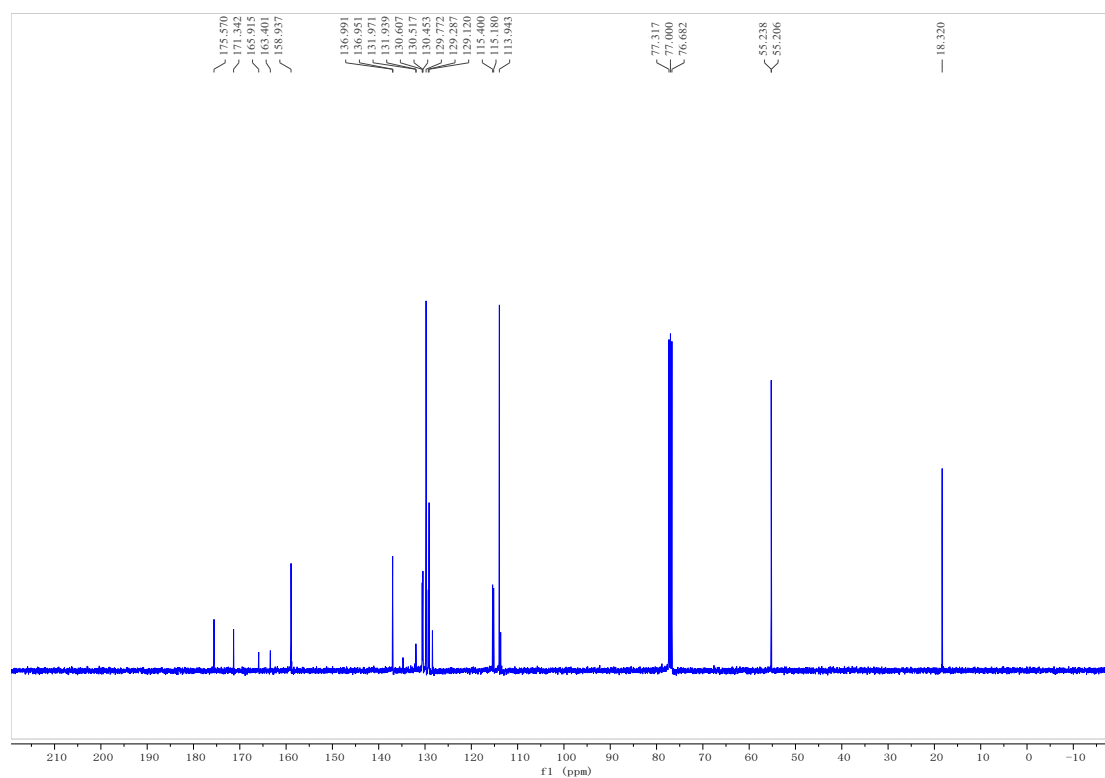 $^{19}\text{F}$  NMR (376 MHz,  $\text{CDCl}_3$ )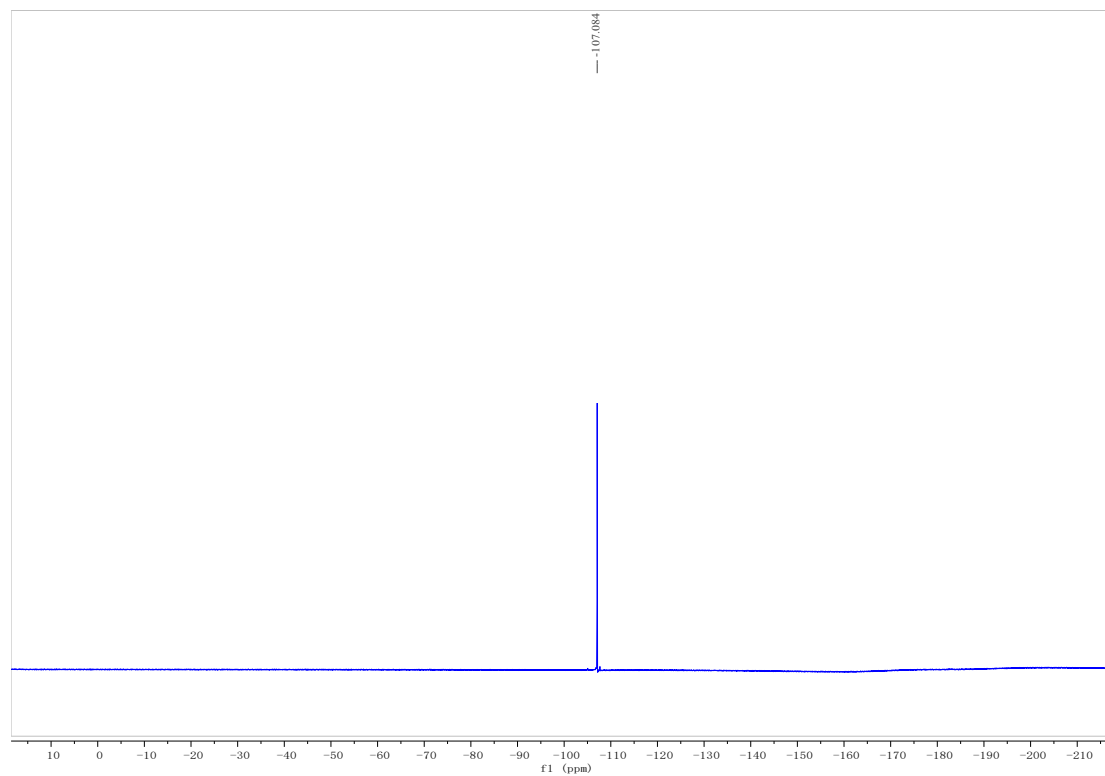

**$^1\text{H}$  and  $^{13}\text{C}$  NMR Spectra for Compound 3ca:** **$^1\text{H}$  NMR (400 MHz,  $\text{CDCl}_3$ )**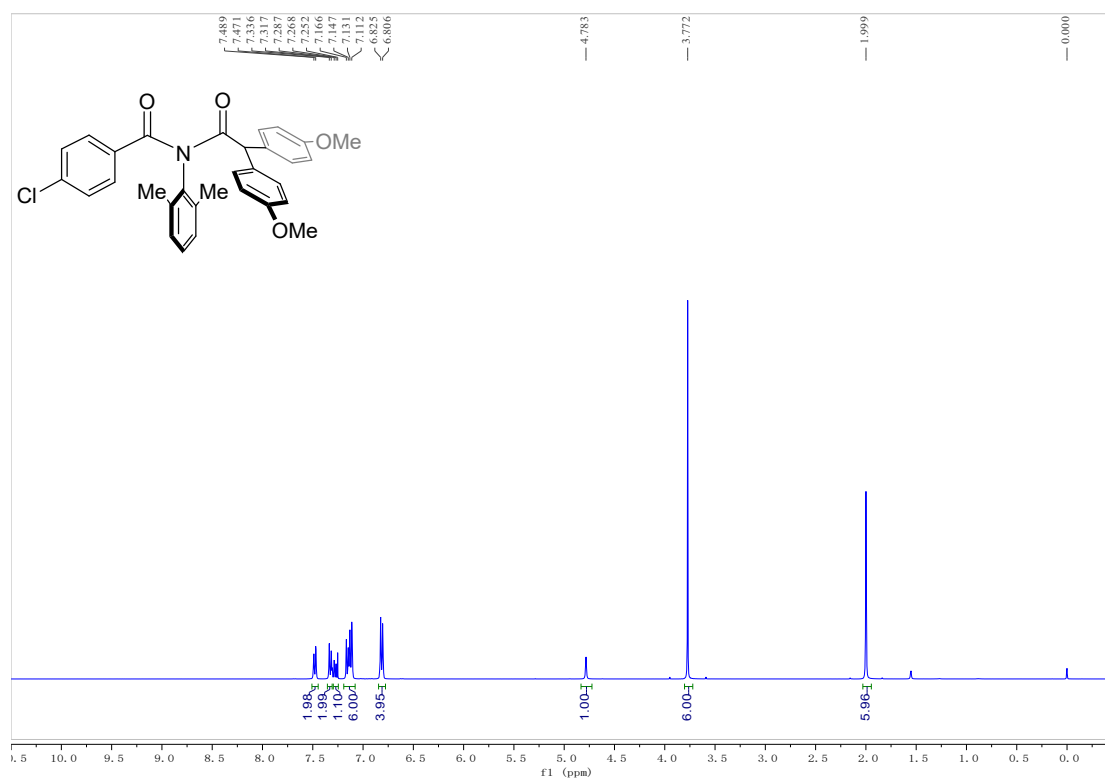 **$^{13}\text{C}$  NMR (100 MHz,  $\text{CDCl}_3$ )**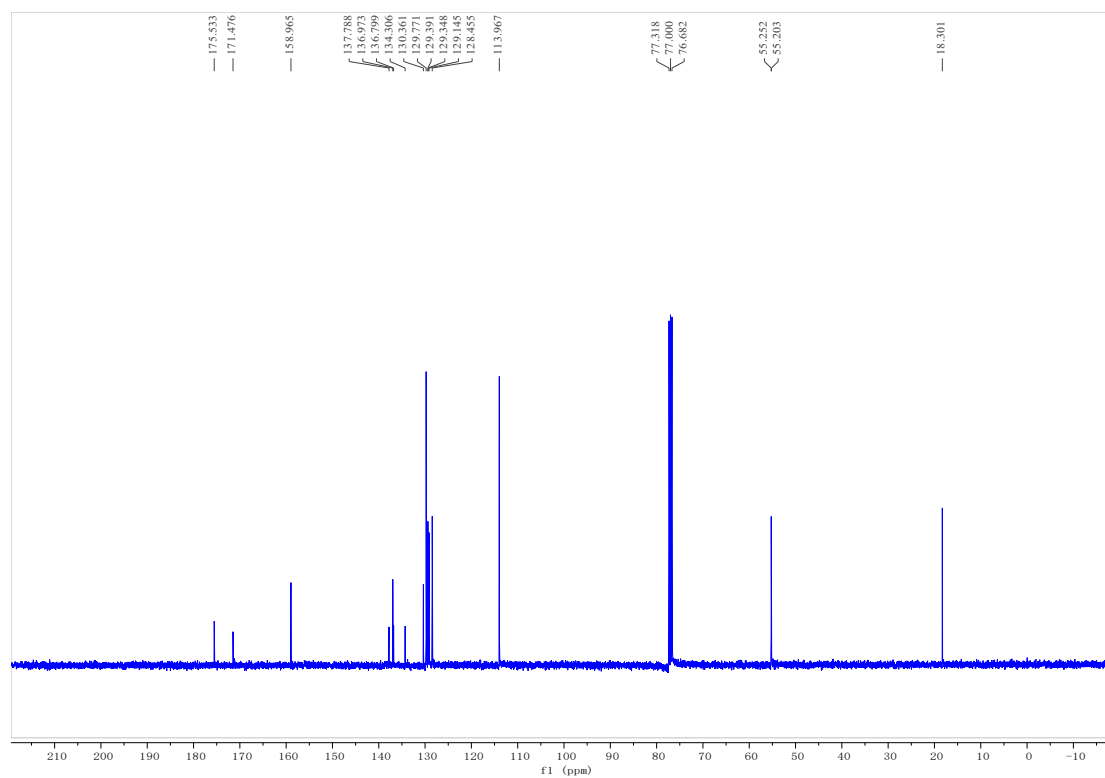

**<sup>1</sup>H and <sup>13</sup>C NMR Spectra for Compound 3da:****<sup>1</sup>H NMR (400 MHz, CDCl<sub>3</sub>)**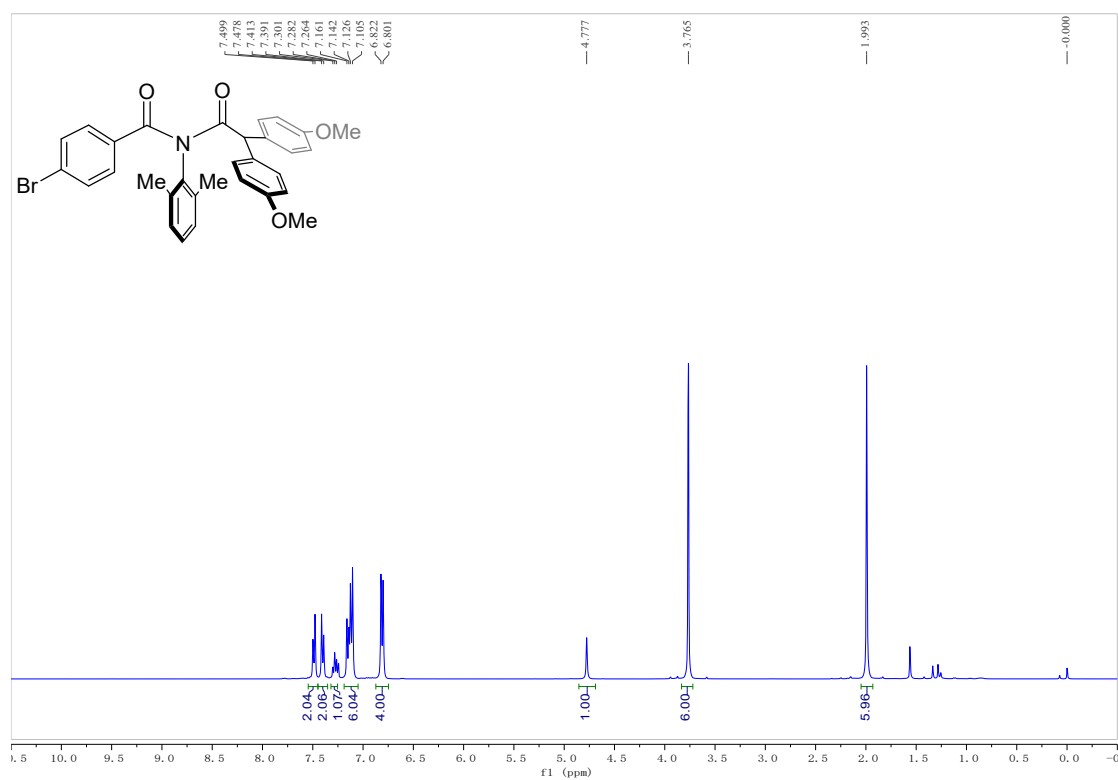**<sup>13</sup>C NMR (100 MHz, CDCl<sub>3</sub>)**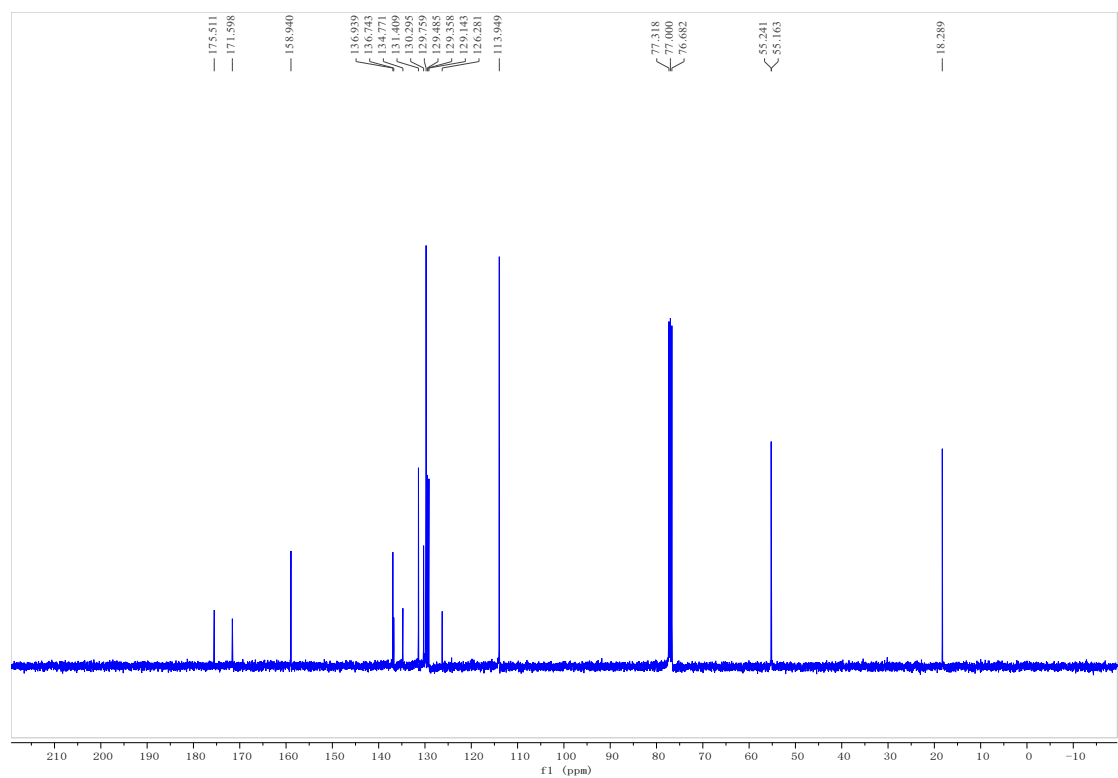



**$^1\text{H}$  and  $^{13}\text{C}$  NMR Spectra for Compound 3ea:** $^1\text{H}$  NMR (400 MHz,  $\text{CDCl}_3$ )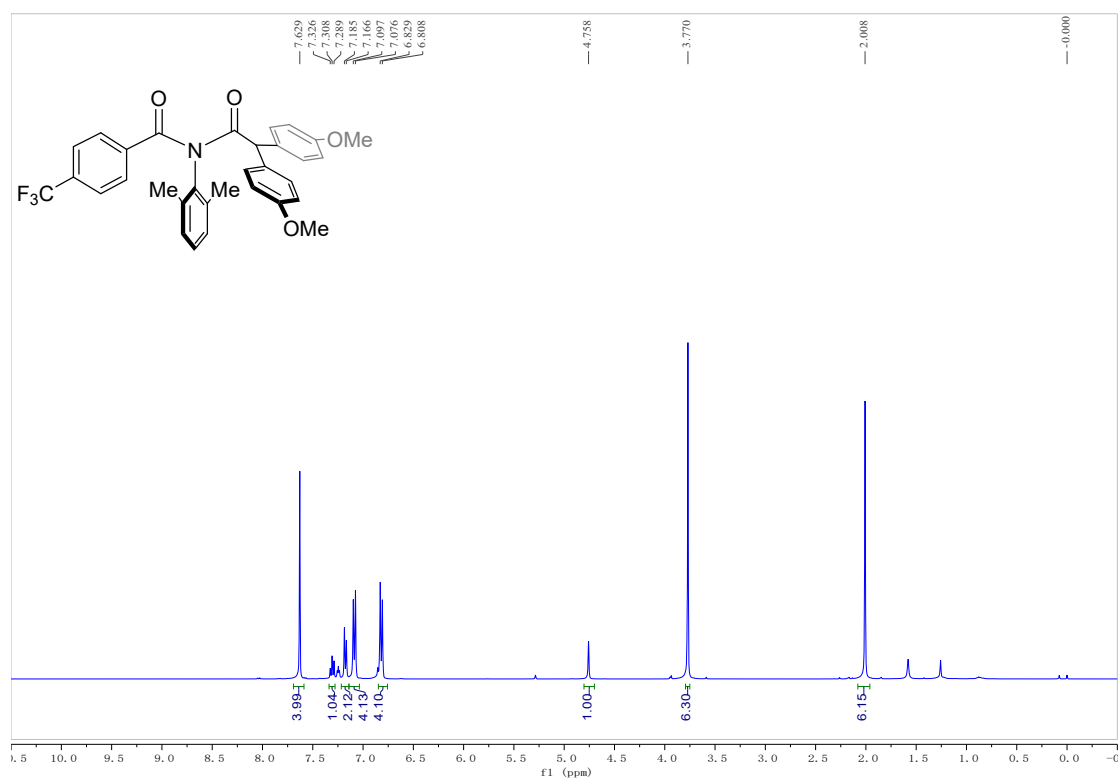 $^{13}\text{C}$  NMR (100 MHz,  $\text{CDCl}_3$ )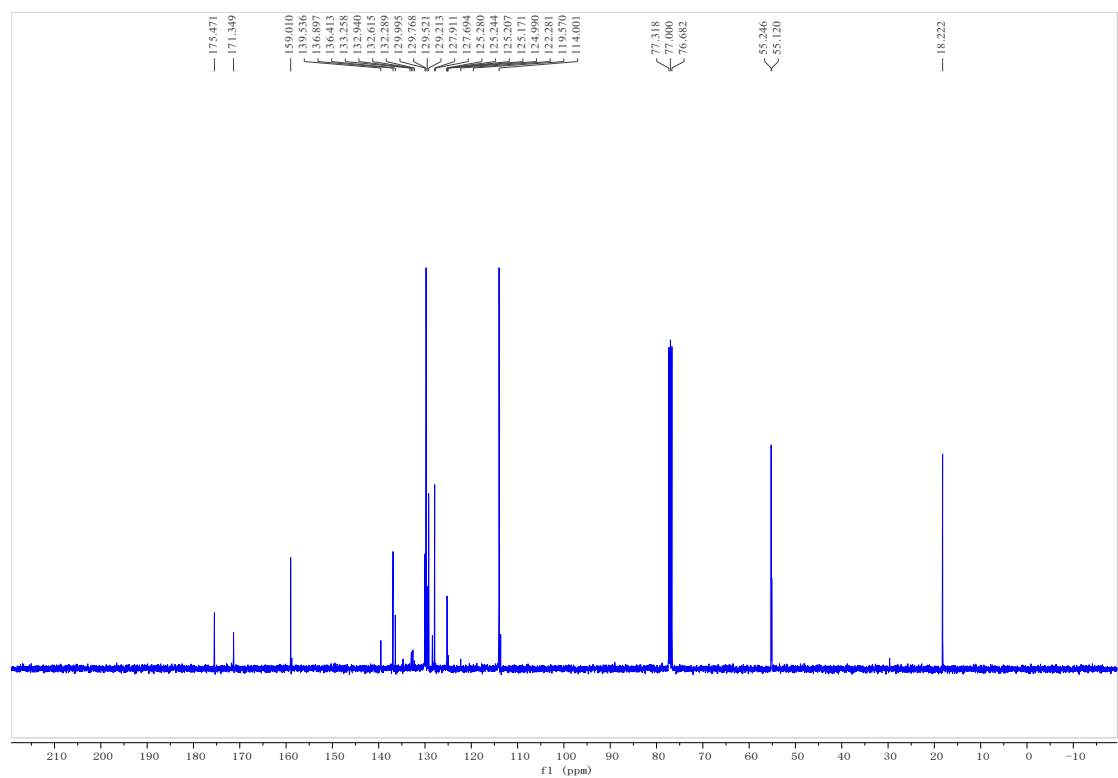

$^{19}\text{F}$  NMR (376 MHz,  $\text{CDCl}_3$ )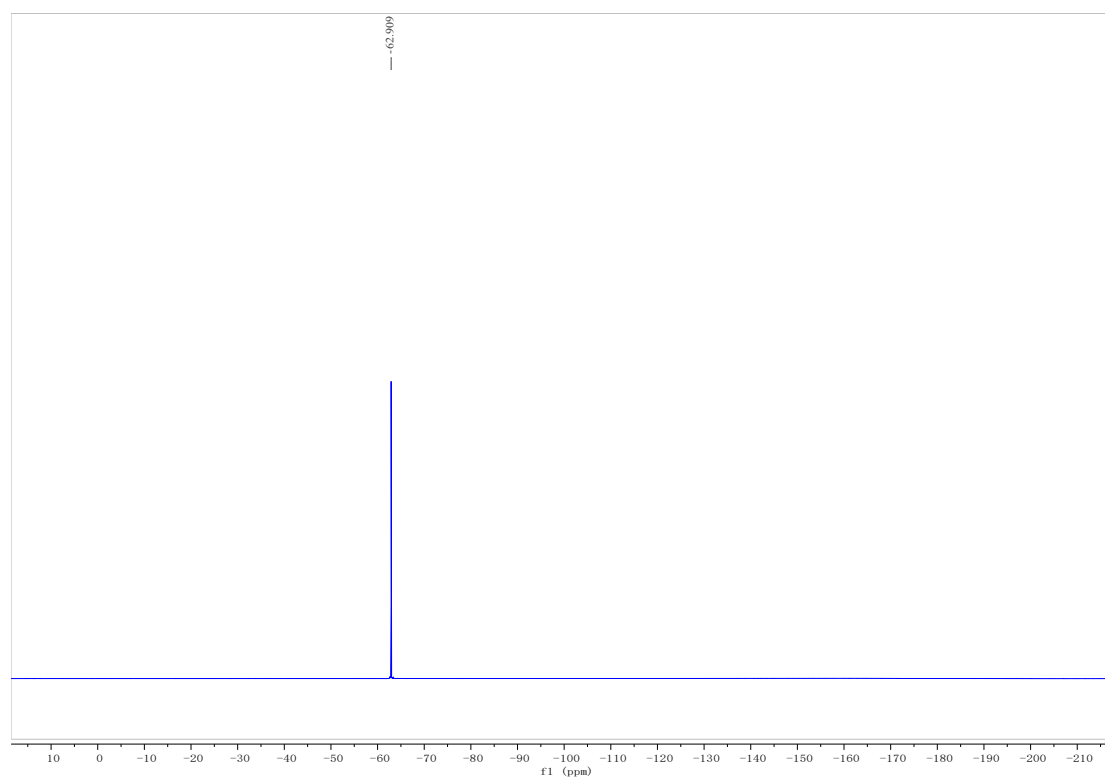 $^1\text{H}$  and  $^{13}\text{C}$  NMR Spectra for Compound 3fa: $^1\text{H}$  NMR (400 MHz,  $\text{CDCl}_3$ )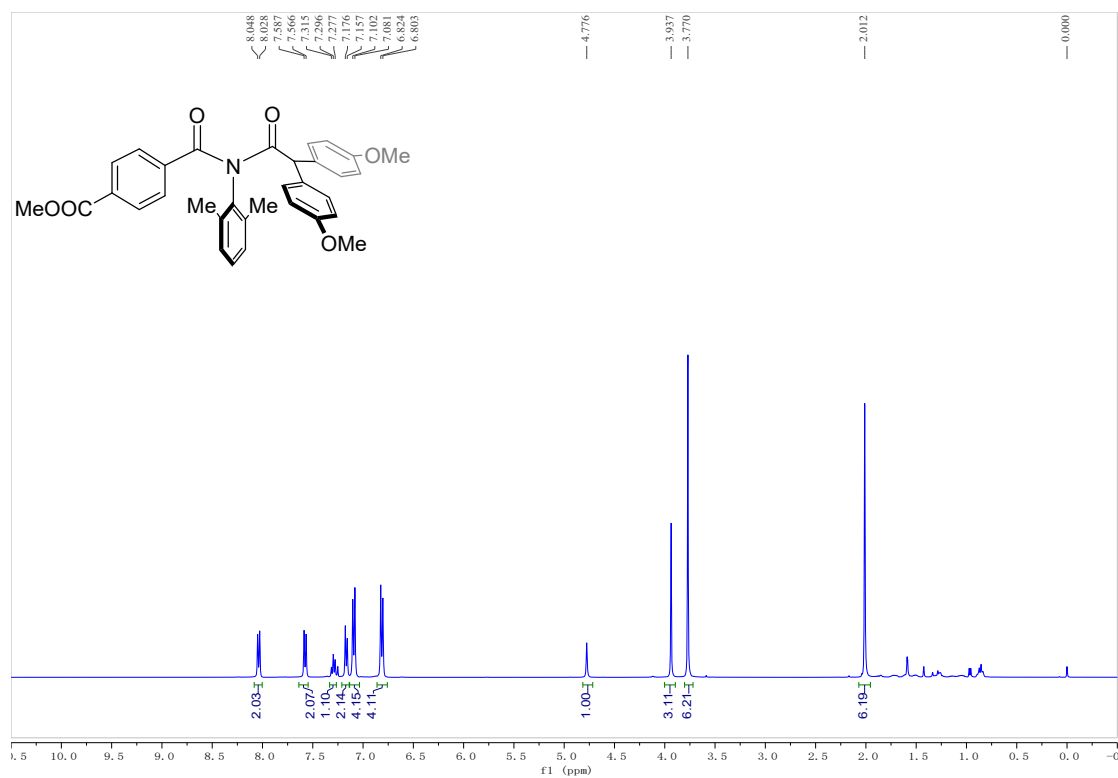

$^{13}\text{C}$  NMR (100 MHz,  $\text{CDCl}_3$ )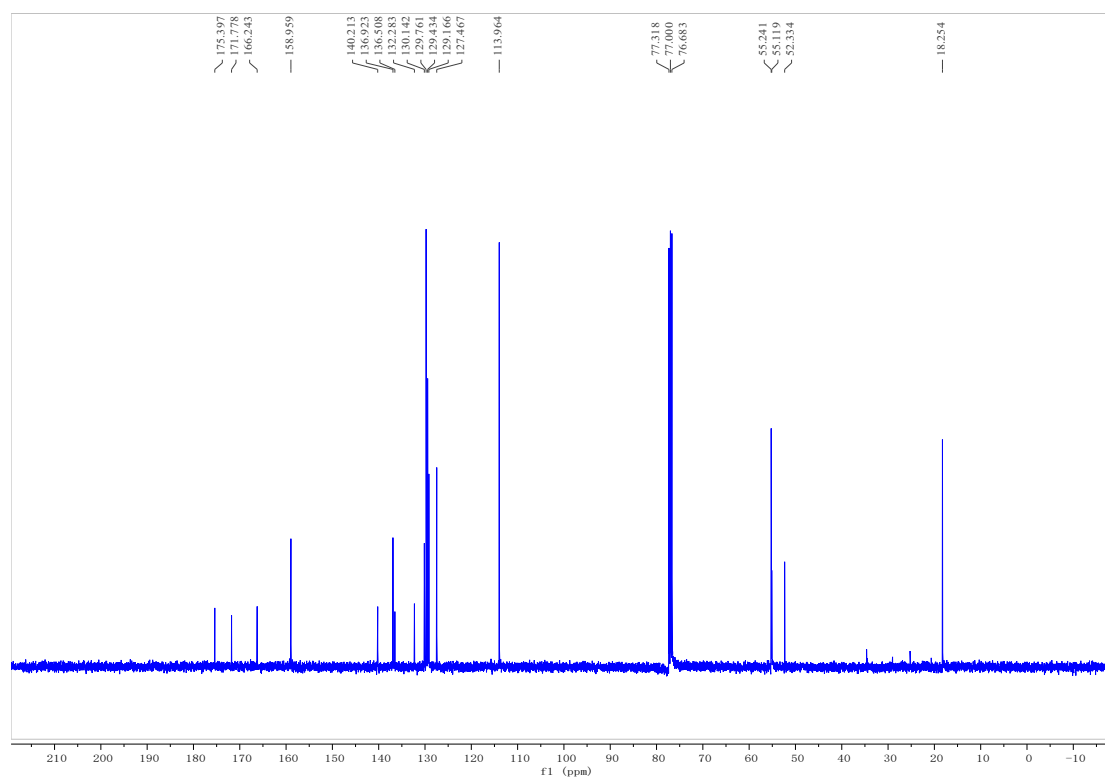 $^1\text{H}$  and  $^{13}\text{C}$  NMR Spectra for Compound 3ga: $^1\text{H}$  NMR (400 MHz,  $\text{CDCl}_3$ )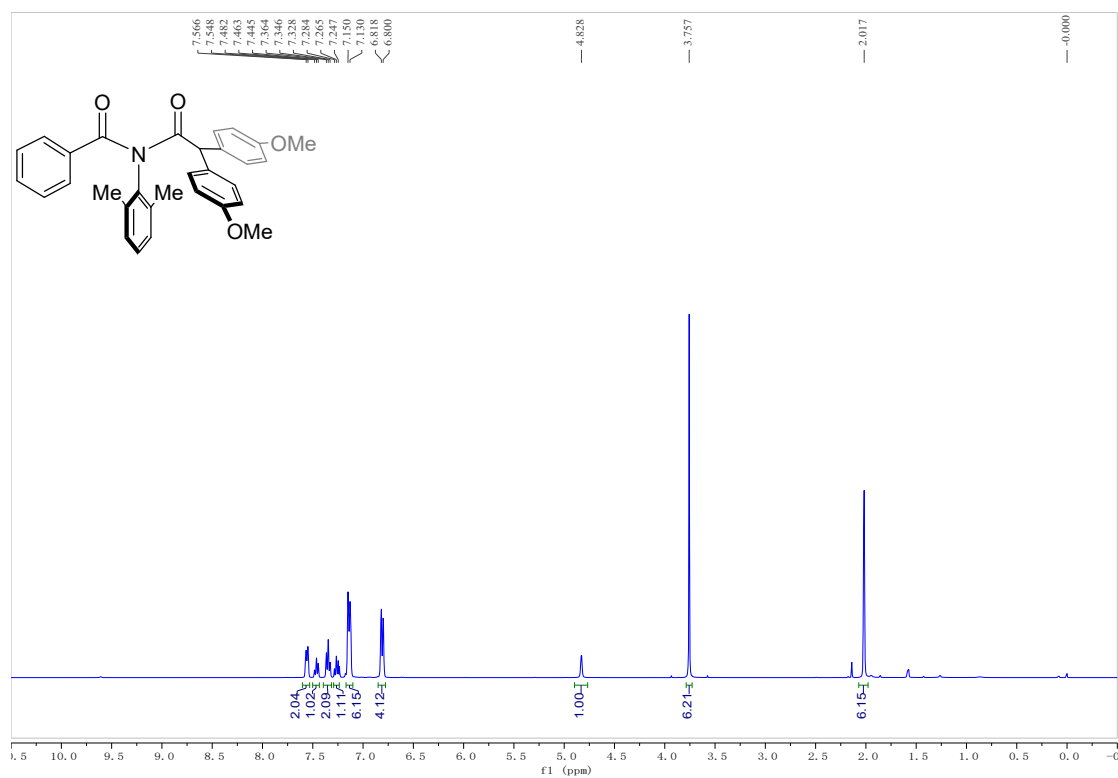

$^{13}\text{C}$  NMR (100 MHz,  $\text{CDCl}_3$ )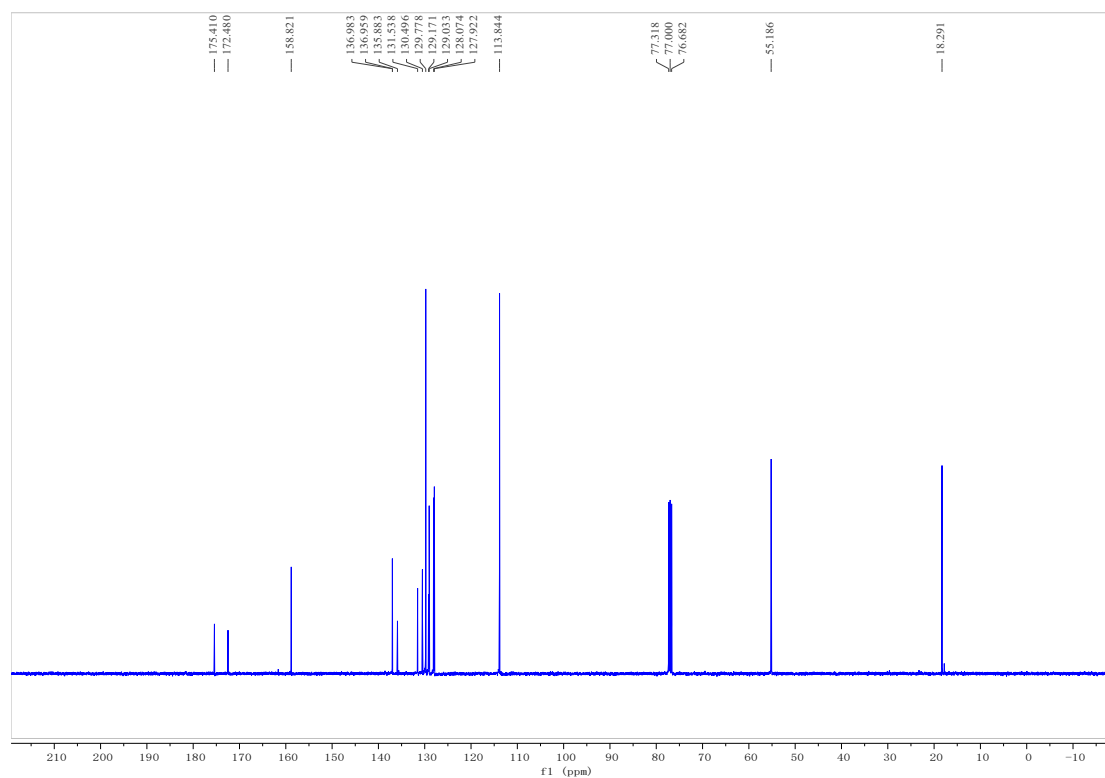 $^1\text{H}$  and  $^{13}\text{C}$  NMR Spectra for Compound 3ha: $^1\text{H}$  NMR (400 MHz,  $\text{CDCl}_3$ )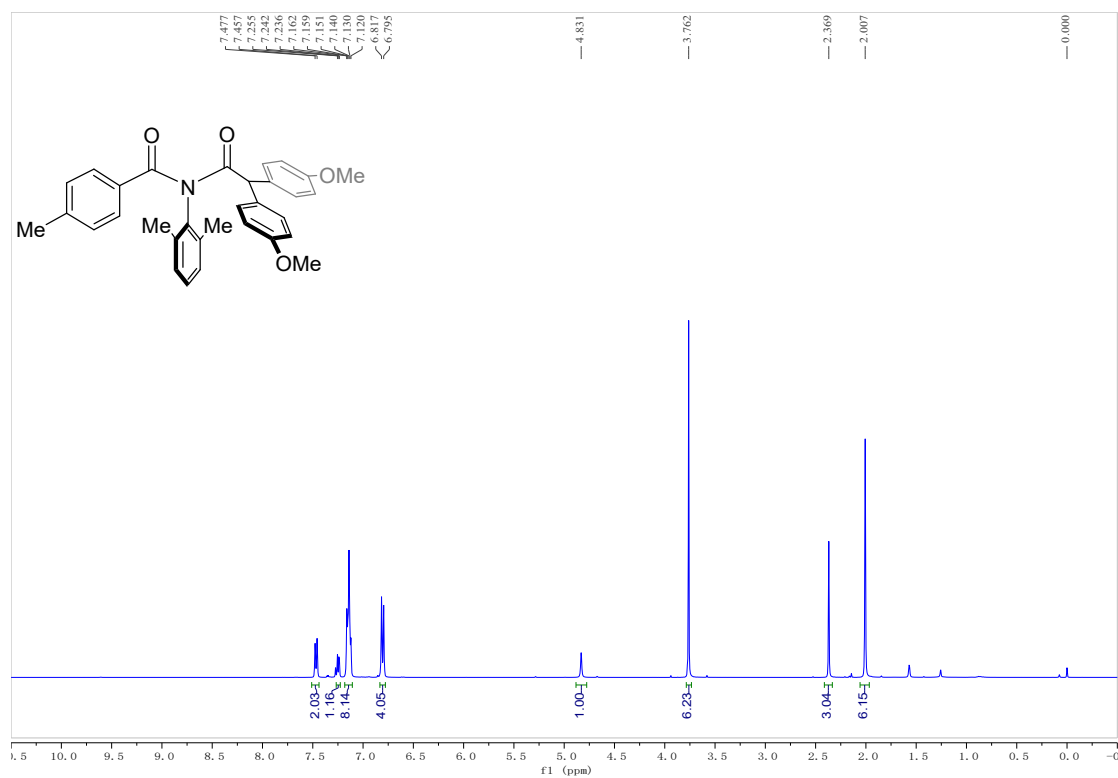

$^{13}\text{C}$  NMR (100 MHz,  $\text{CDCl}_3$ )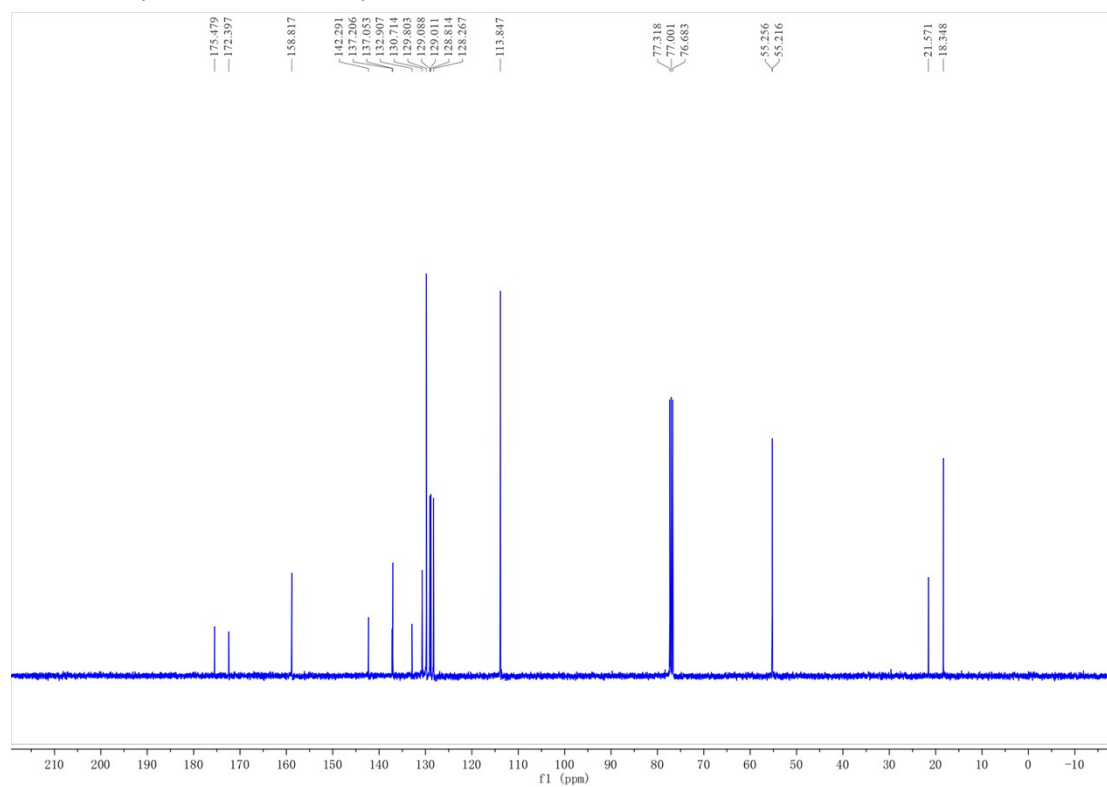 $^1\text{H}$  and  $^{13}\text{C}$  NMR Spectra for Compound 3ia: $^1\text{H}$  NMR (400 MHz,  $\text{CDCl}_3$ )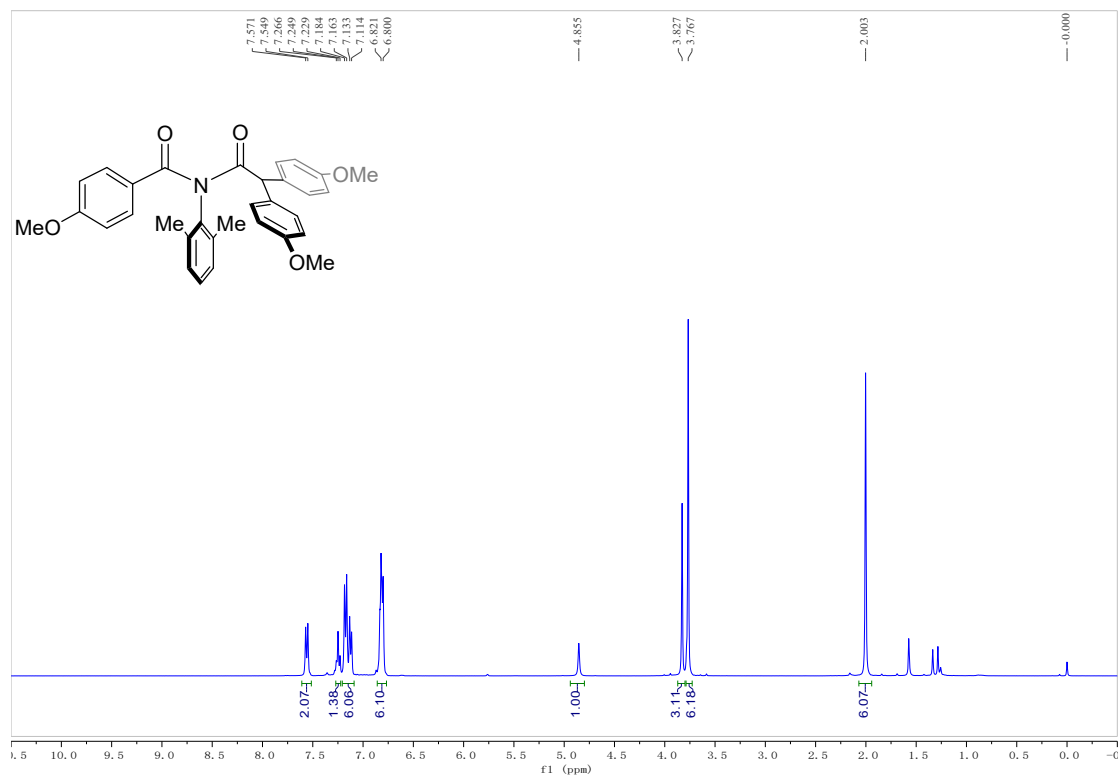

$^{13}\text{C}$  NMR (100 MHz,  $\text{CDCl}_3$ )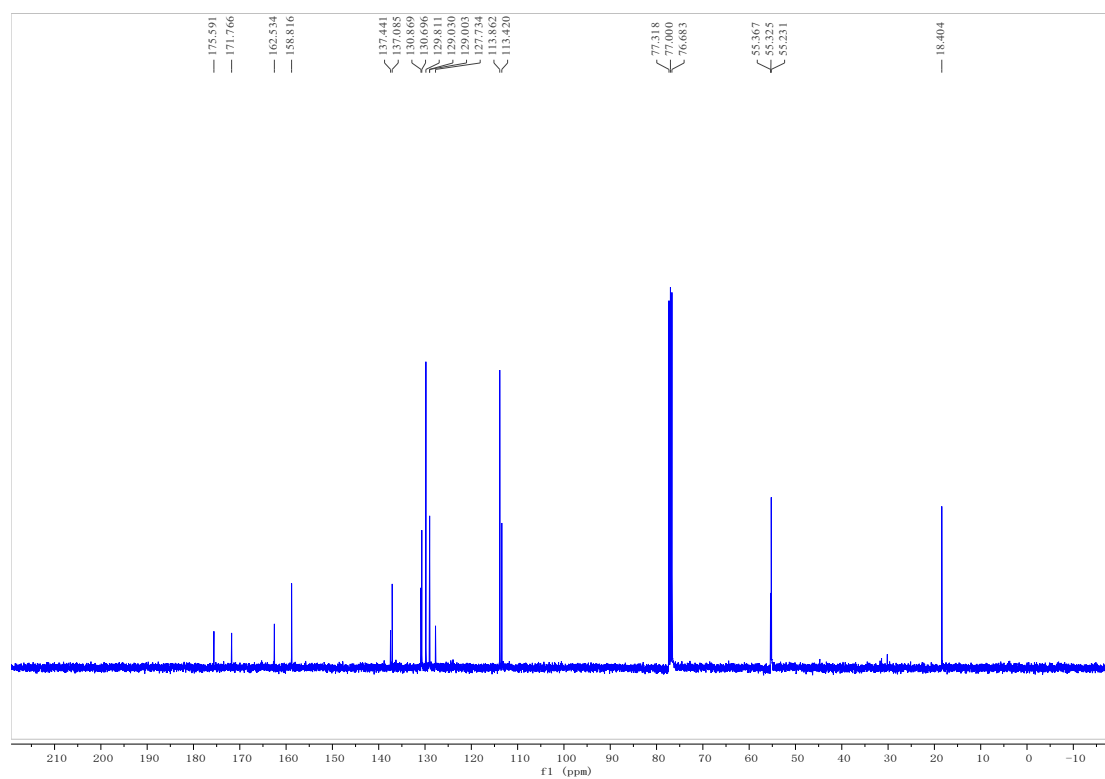 $^1\text{H}$  and  $^{13}\text{C}$  NMR Spectra for Compound 3ja: $^1\text{H}$  NMR (400 MHz,  $\text{CDCl}_3$ )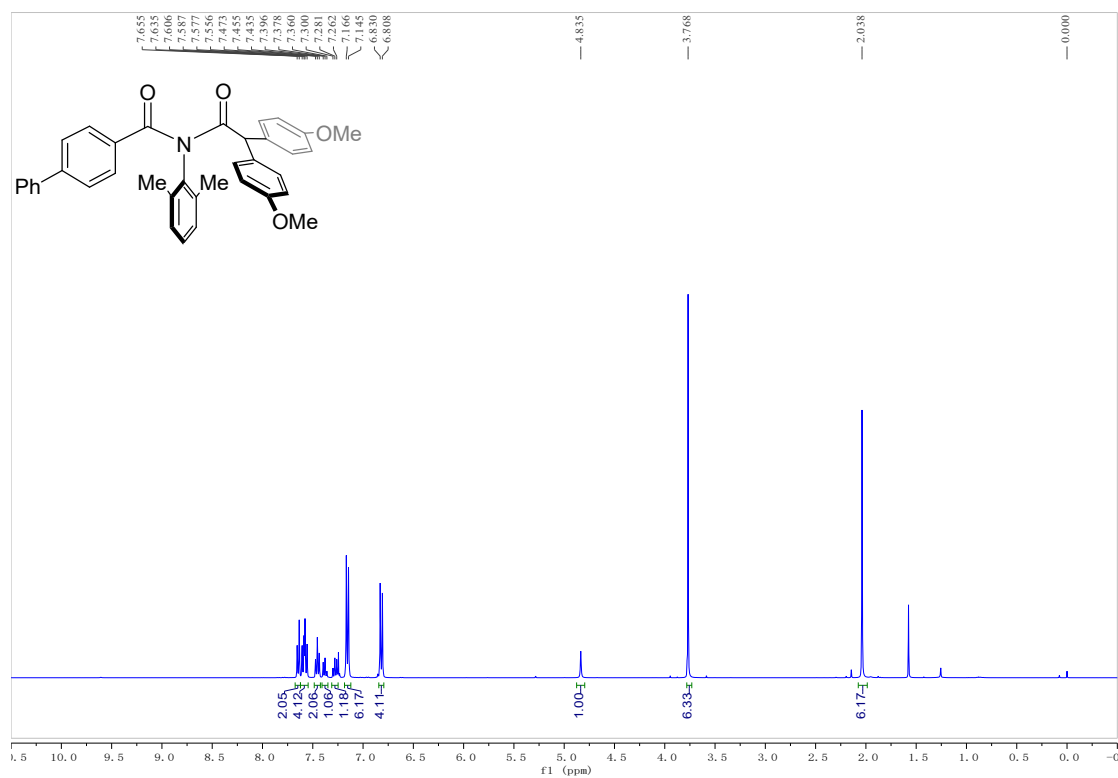

$^{13}\text{C}$  NMR (100 MHz,  $\text{CDCl}_3$ )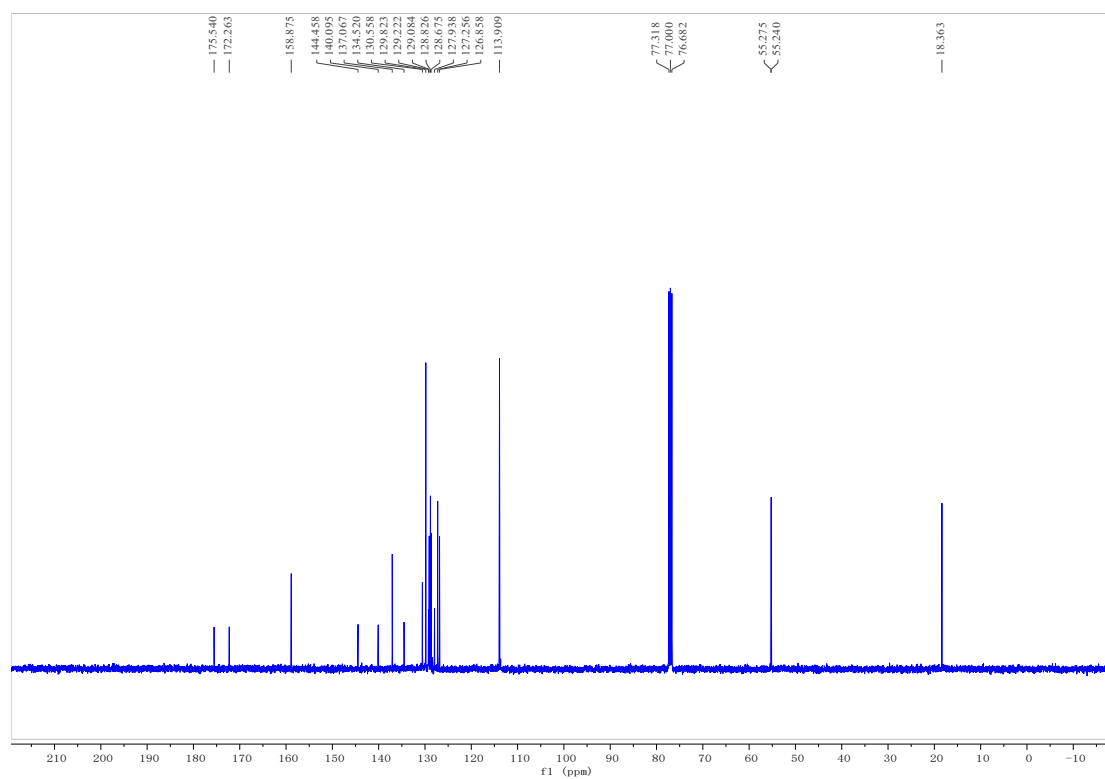 $^1\text{H}$  and  $^{13}\text{C}$  NMR Spectra for Compound 3ka: $^1\text{H}$  NMR (400 MHz,  $\text{CDCl}_3$ )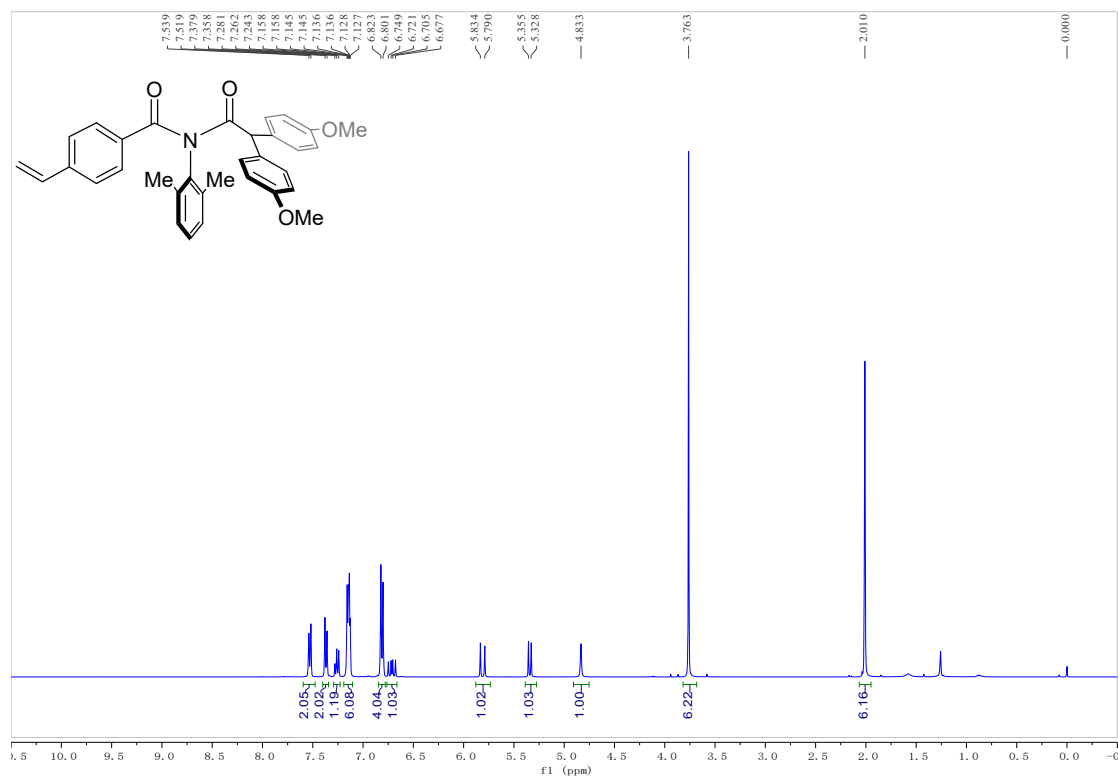

$^{13}\text{C}$  NMR (100 MHz,  $\text{CDCl}_3$ )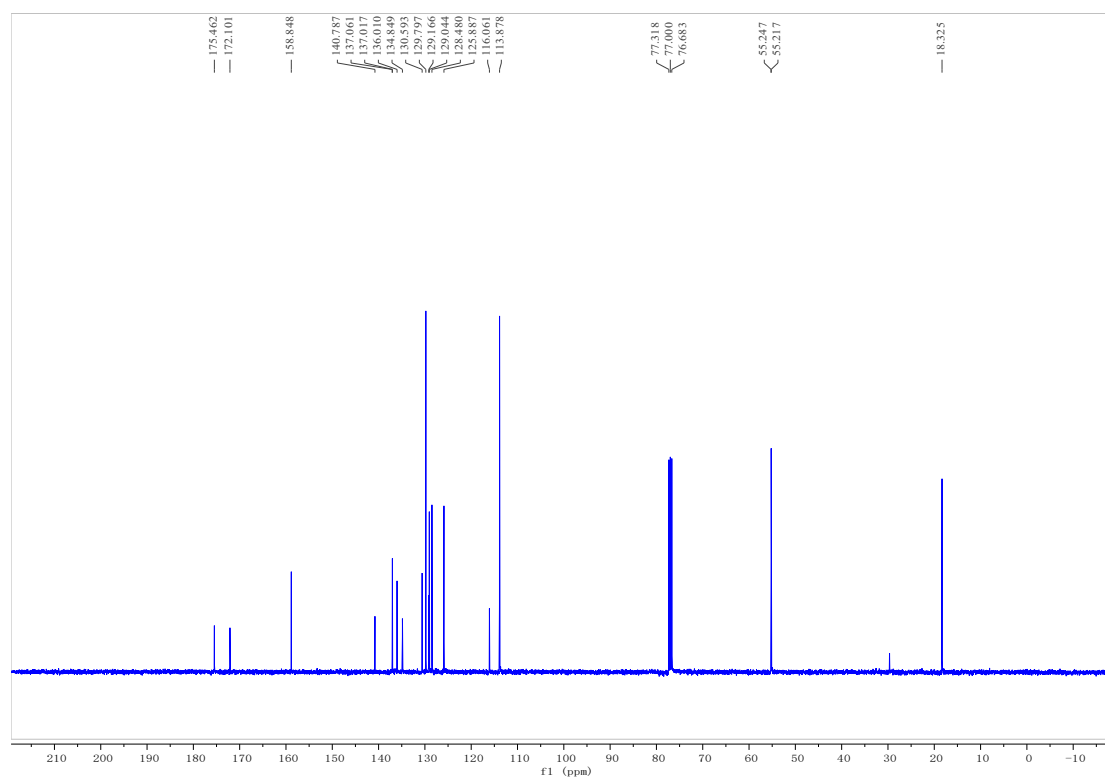 $^1\text{H}$  and  $^{13}\text{C}$  NMR Spectra for Compound 3la: $^1\text{H}$  NMR (400 MHz,  $\text{CDCl}_3$ )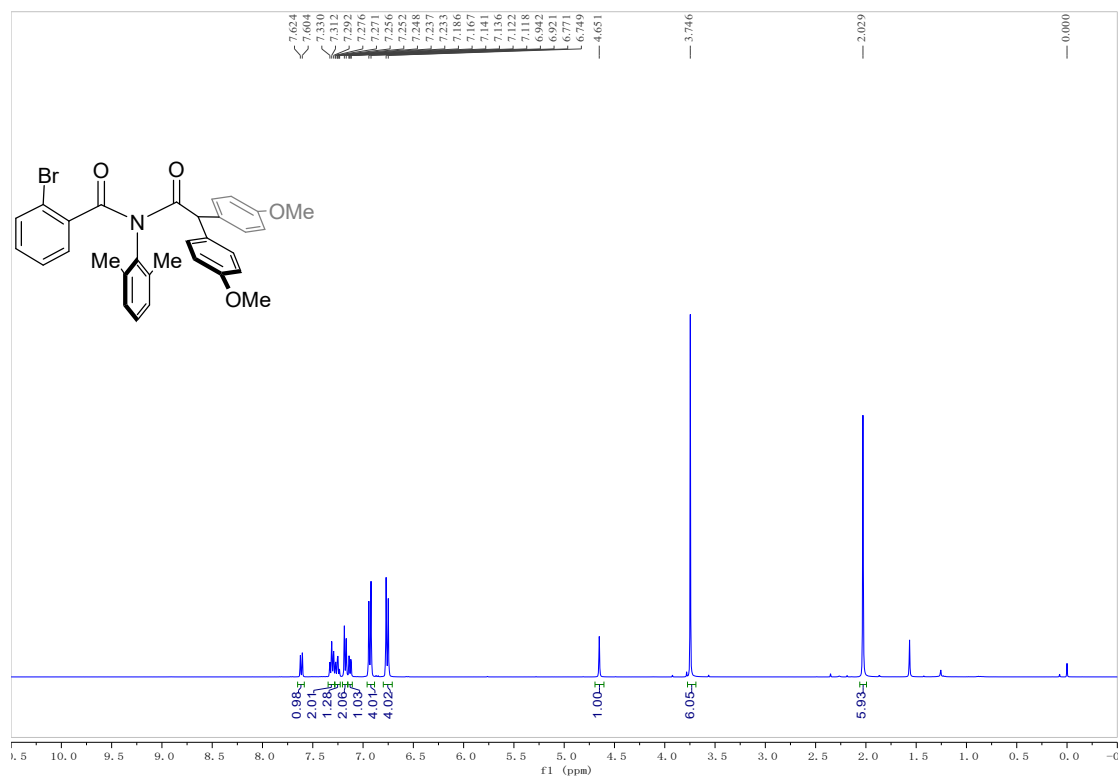



$^{13}\text{C}$  NMR (100 MHz,  $\text{CDCl}_3$ )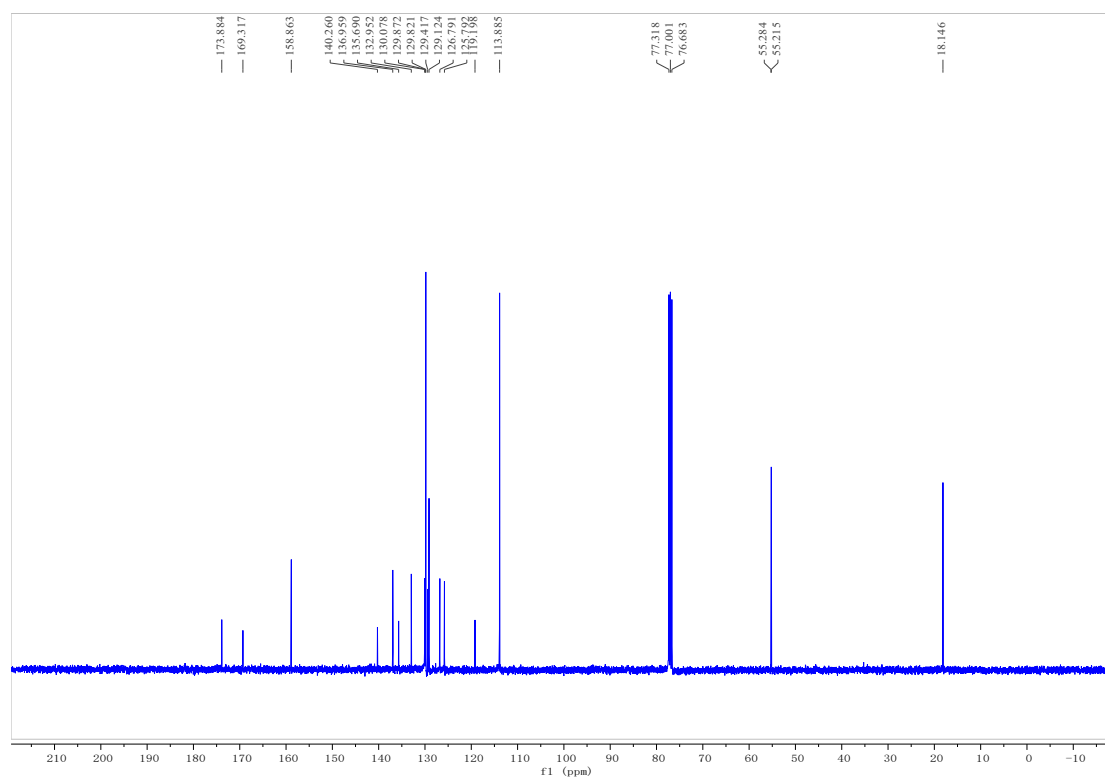 $^1\text{H}$  and  $^{13}\text{C}$  NMR Spectra for Compound 3ma: $^1\text{H}$  NMR (400 MHz,  $\text{CDCl}_3$ )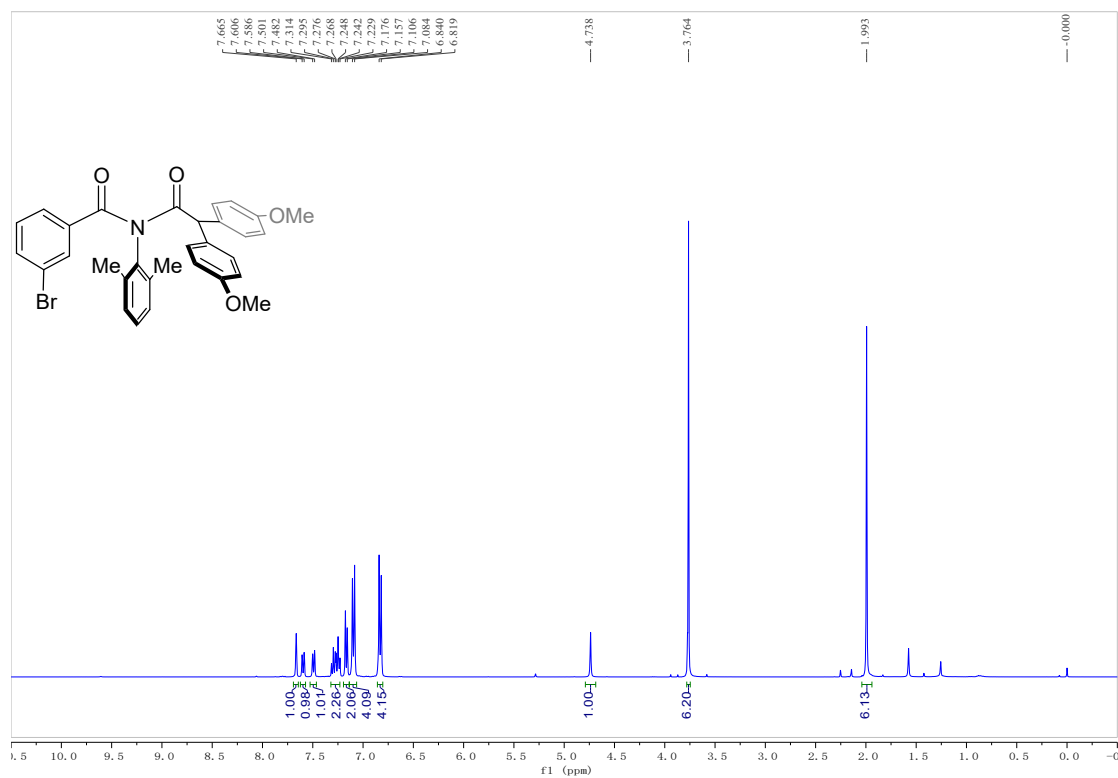

$^{13}\text{C}$  NMR (100 MHz,  $\text{CDCl}_3$ )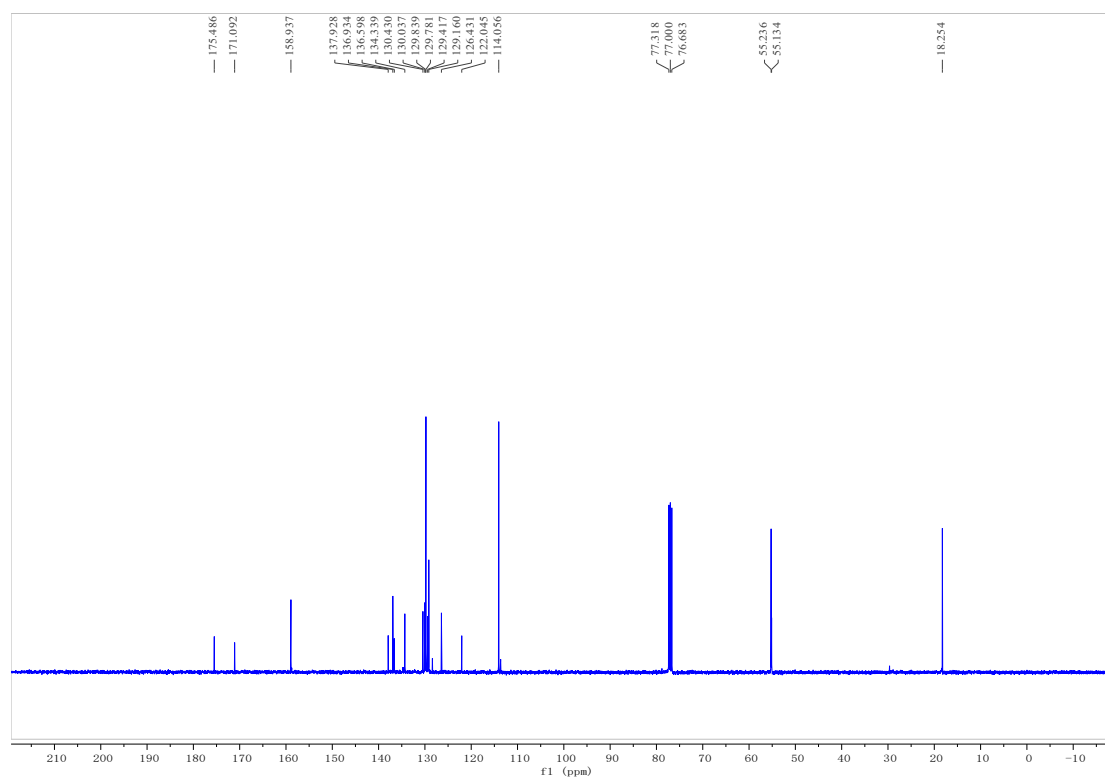 $^1\text{H}$  and  $^{13}\text{C}$  NMR Spectra for Compound 3na: $^1\text{H}$  NMR (400 MHz,  $\text{CDCl}_3$ )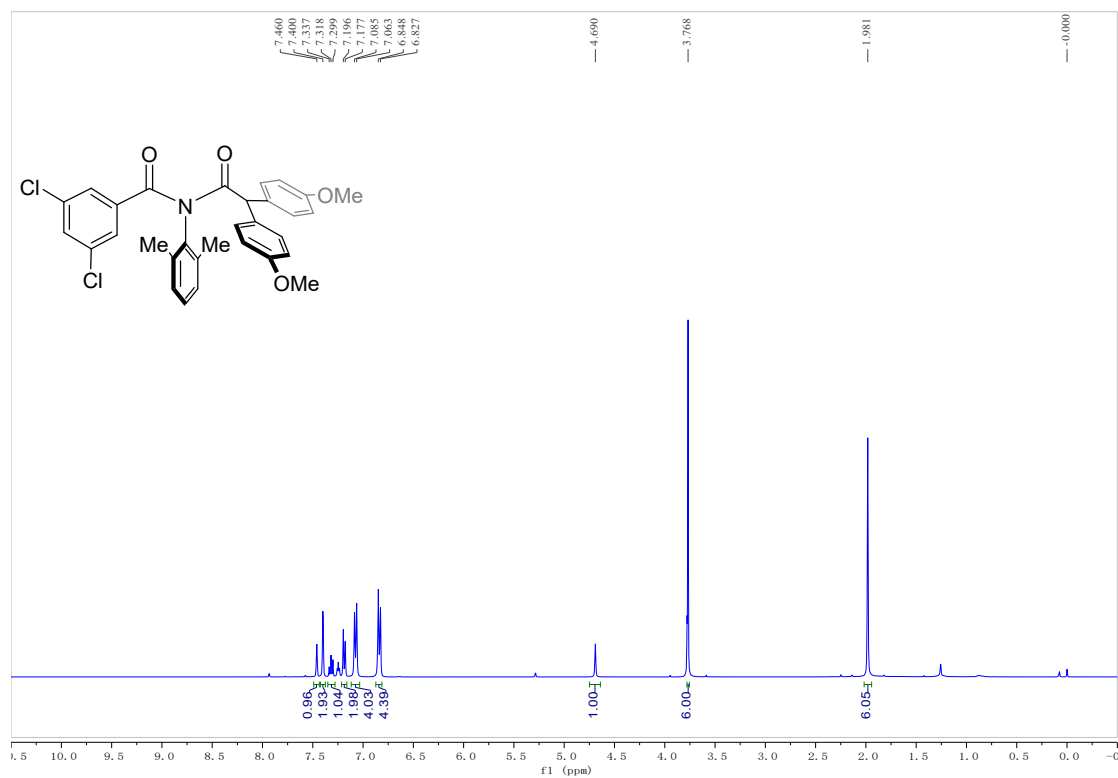

$^{13}\text{C}$  NMR (100 MHz,  $\text{CDCl}_3$ )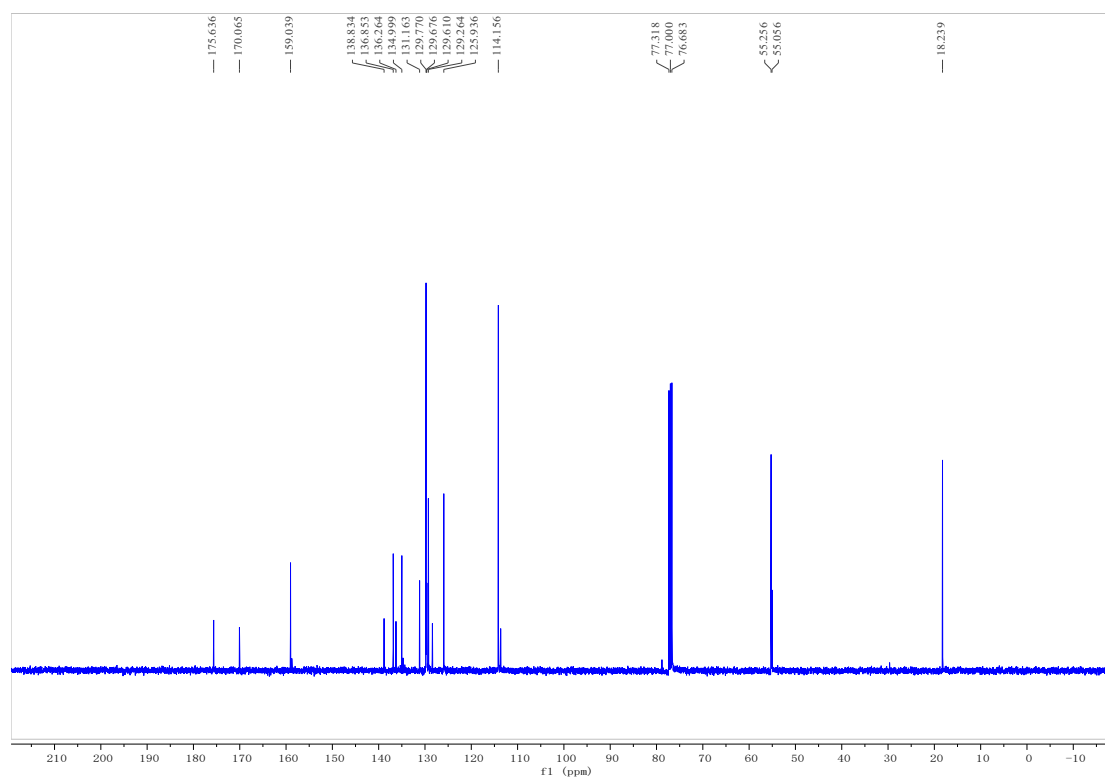 $^1\text{H}$  and  $^{13}\text{C}$  NMR Spectra for Compound 30a: $^1\text{H}$  NMR (400 MHz,  $\text{CDCl}_3$ )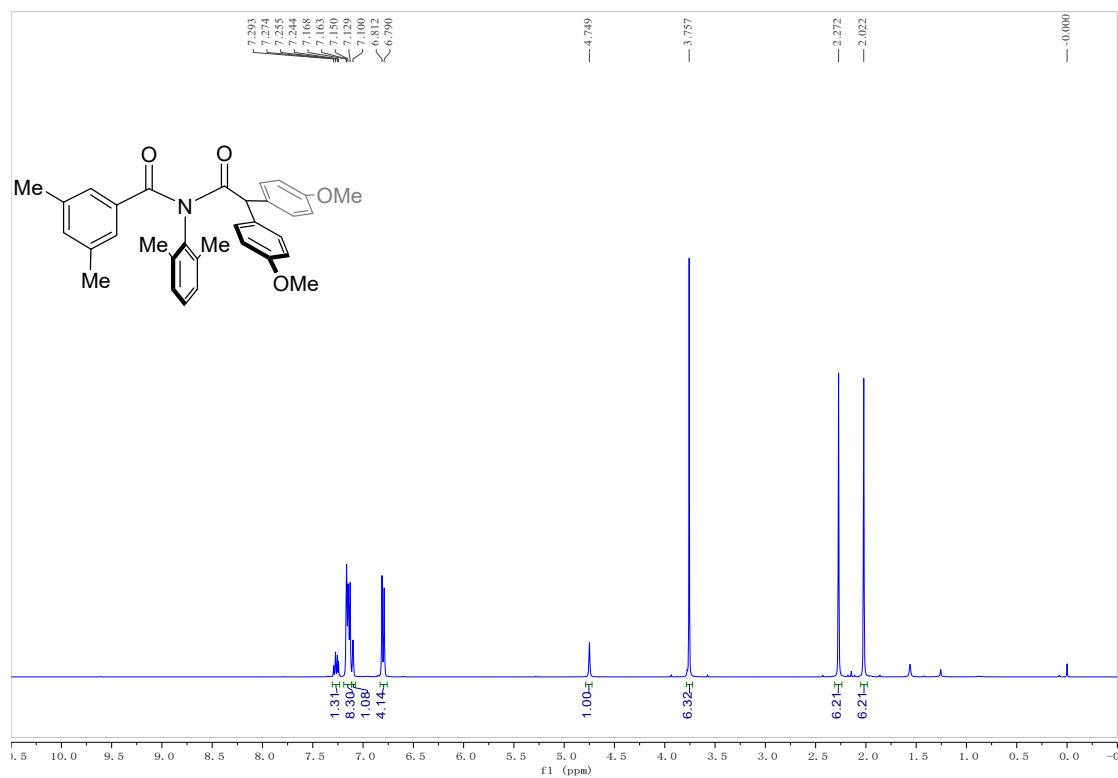

$^{13}\text{C}$  NMR (100 MHz,  $\text{CDCl}_3$ )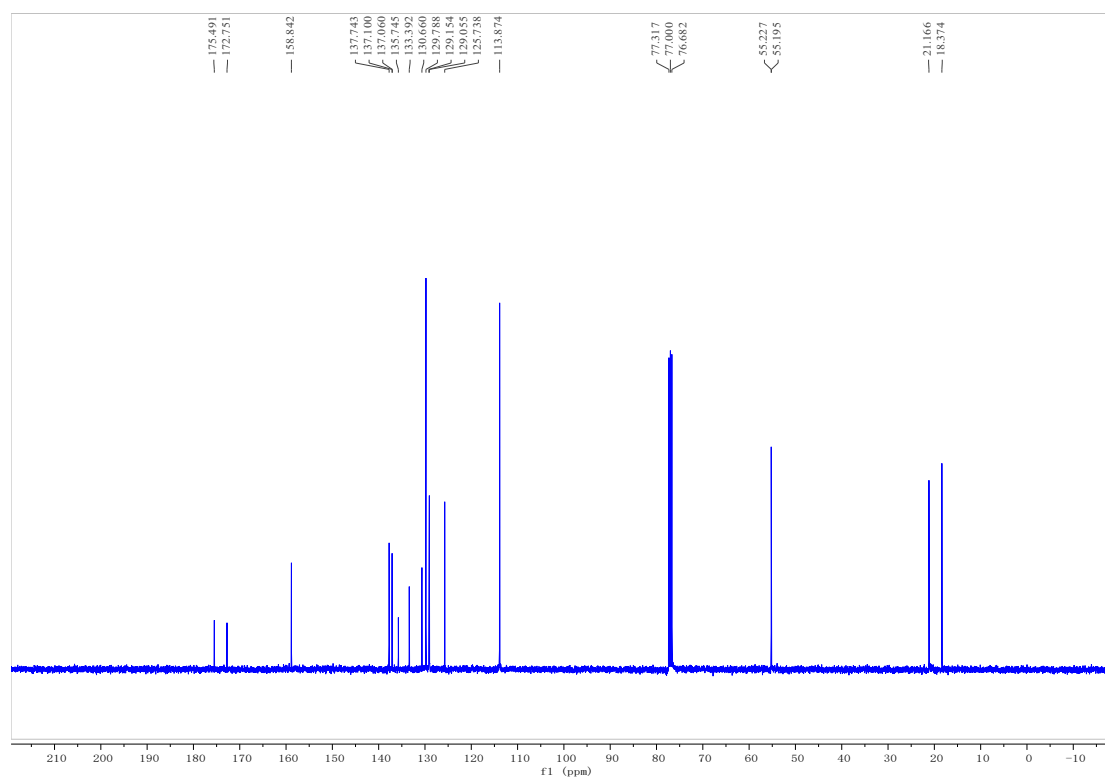 $^1\text{H}$  and  $^{13}\text{C}$  NMR Spectra for Compound 3pa: $^1\text{H}$  NMR (400 MHz,  $\text{CDCl}_3$ )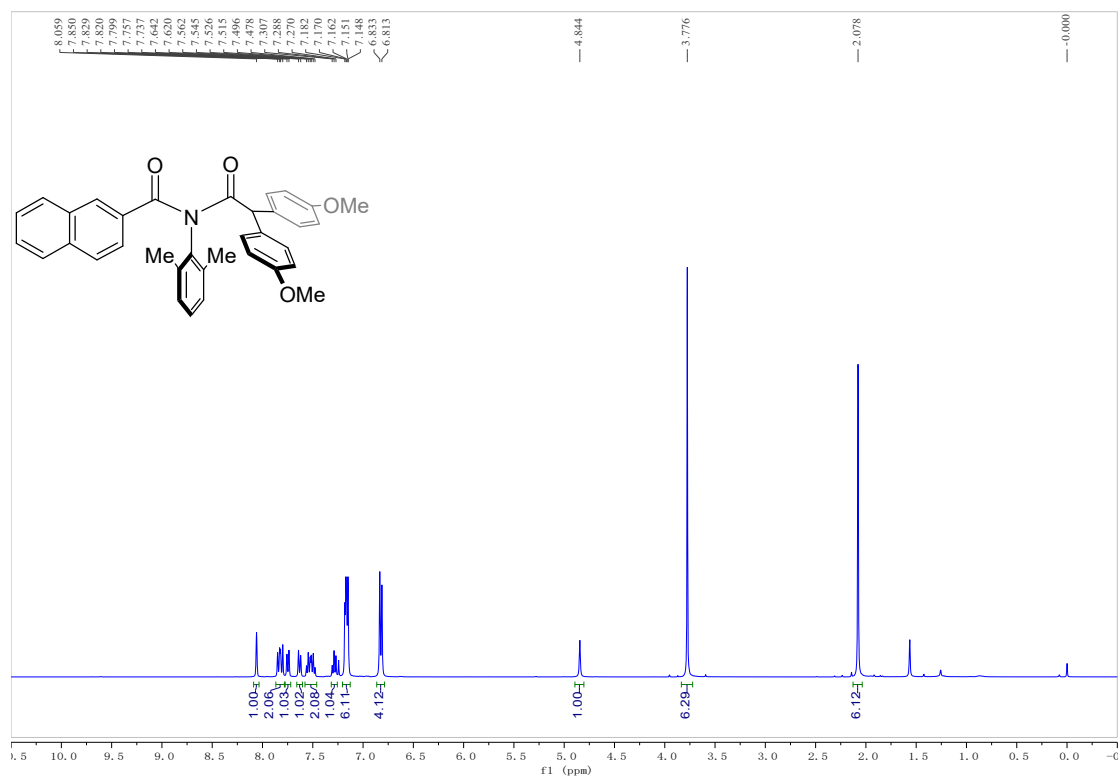

$^{13}\text{C}$  NMR (100 MHz,  $\text{CDCl}_3$ )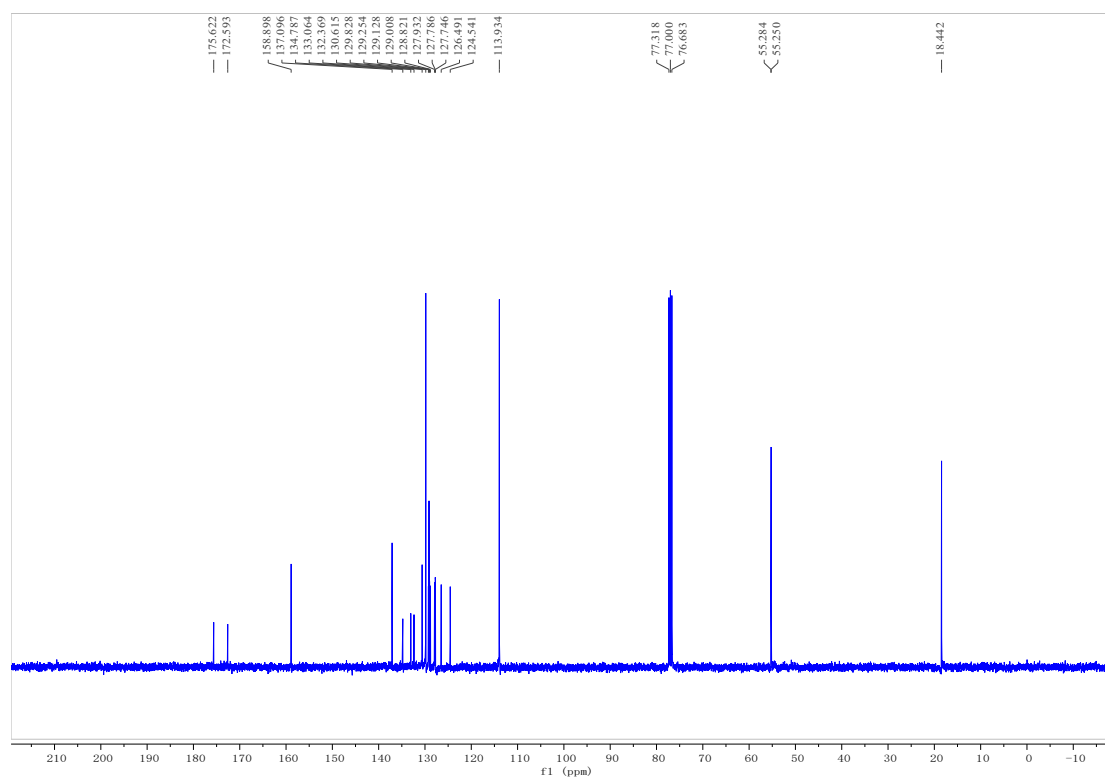 $^1\text{H}$  and  $^{13}\text{C}$  NMR Spectra for Compound 3qa: $^1\text{H}$  NMR (400 MHz,  $\text{CDCl}_3$ )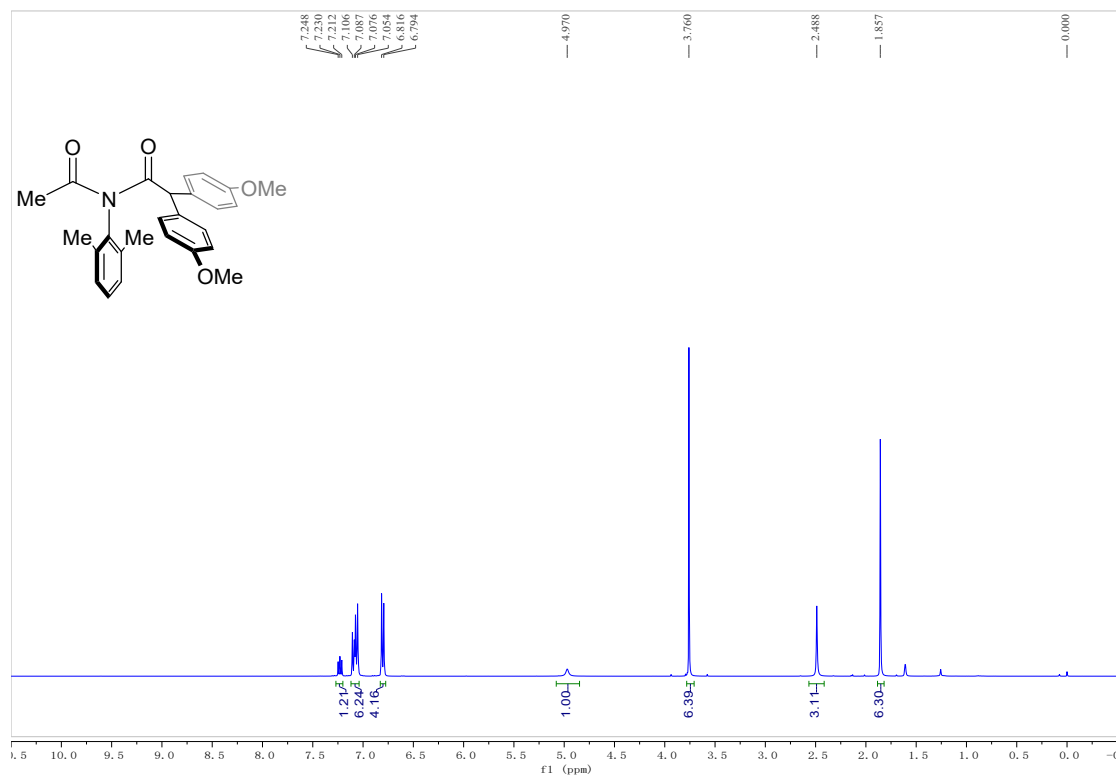

$^{13}\text{C}$  NMR (100 MHz,  $\text{CDCl}_3$ )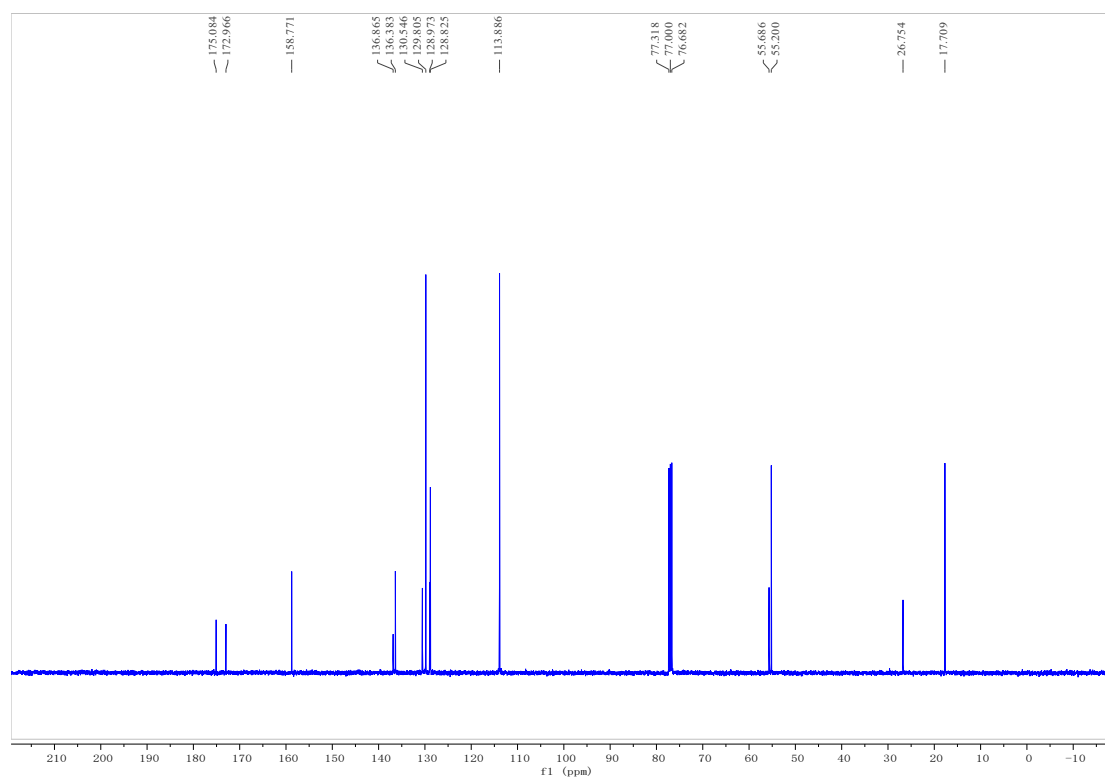 $^1\text{H}$  and  $^{13}\text{C}$  NMR Spectra for Compound 3ra: $^1\text{H}$  NMR (400 MHz,  $\text{CDCl}_3$ )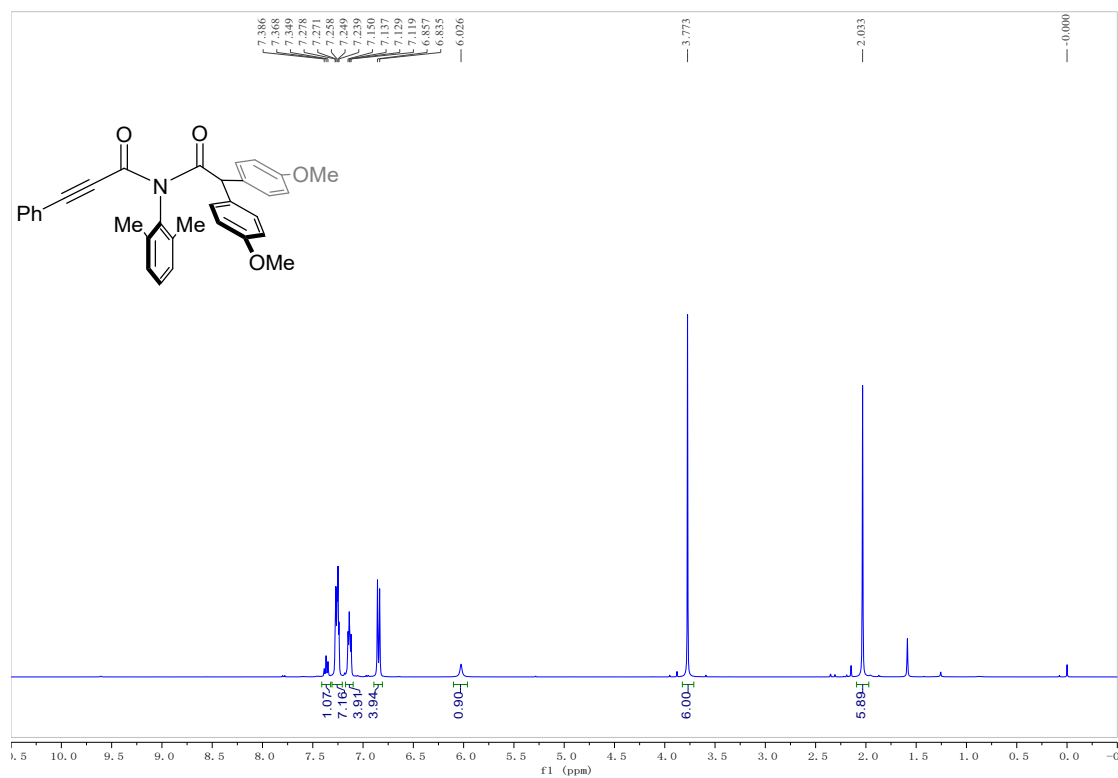

$^{13}\text{C}$  NMR (100 MHz,  $\text{CDCl}_3$ )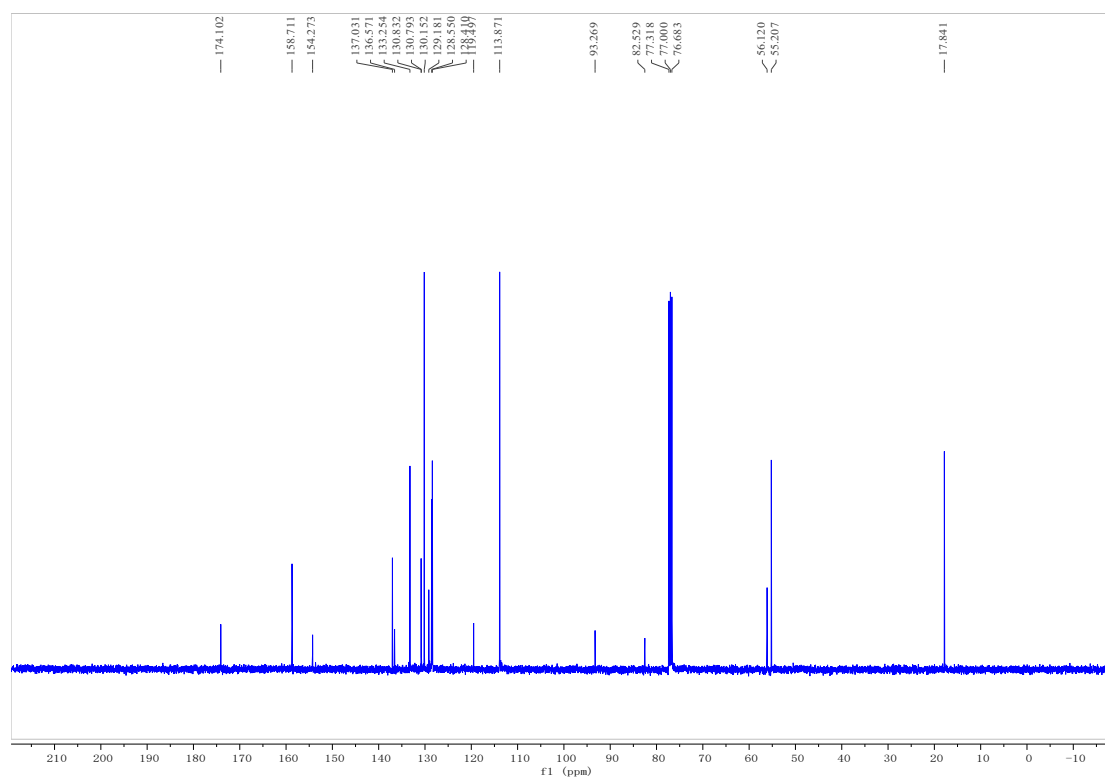 $^1\text{H}$  and  $^{13}\text{C}$  NMR Spectra for Compound 3sa: $^1\text{H}$  NMR (400 MHz,  $\text{CDCl}_3$ )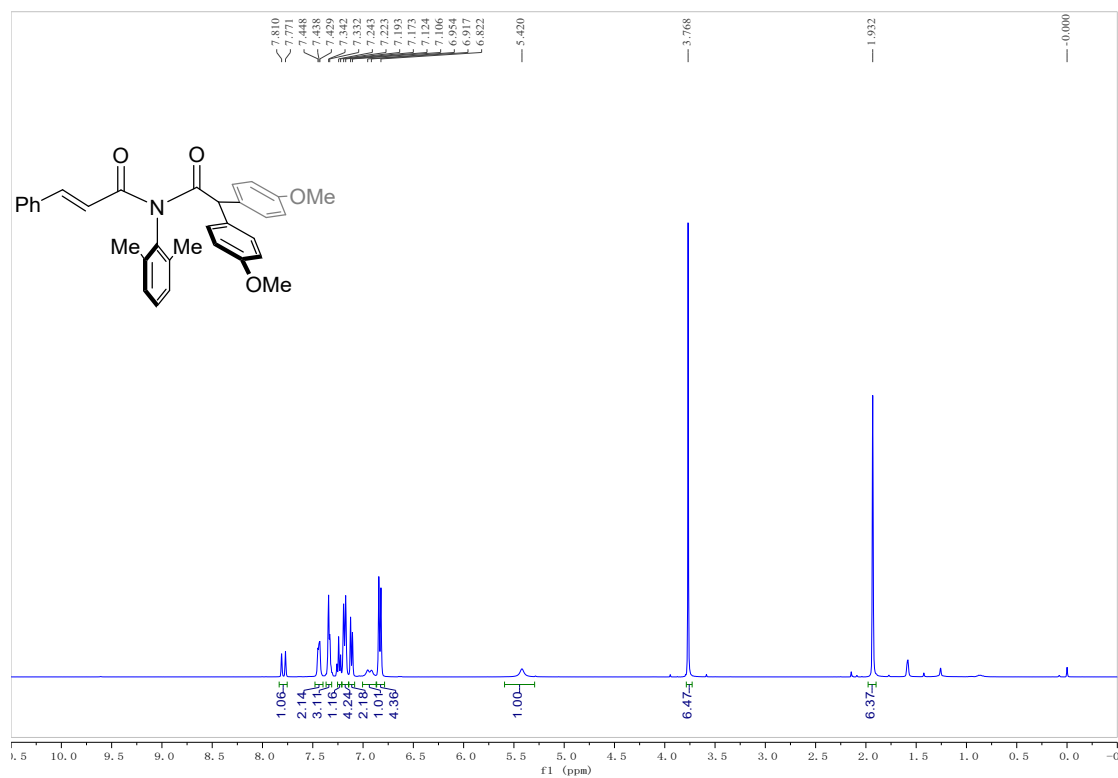

$^{13}\text{C}$  NMR (100 MHz,  $\text{CDCl}_3$ )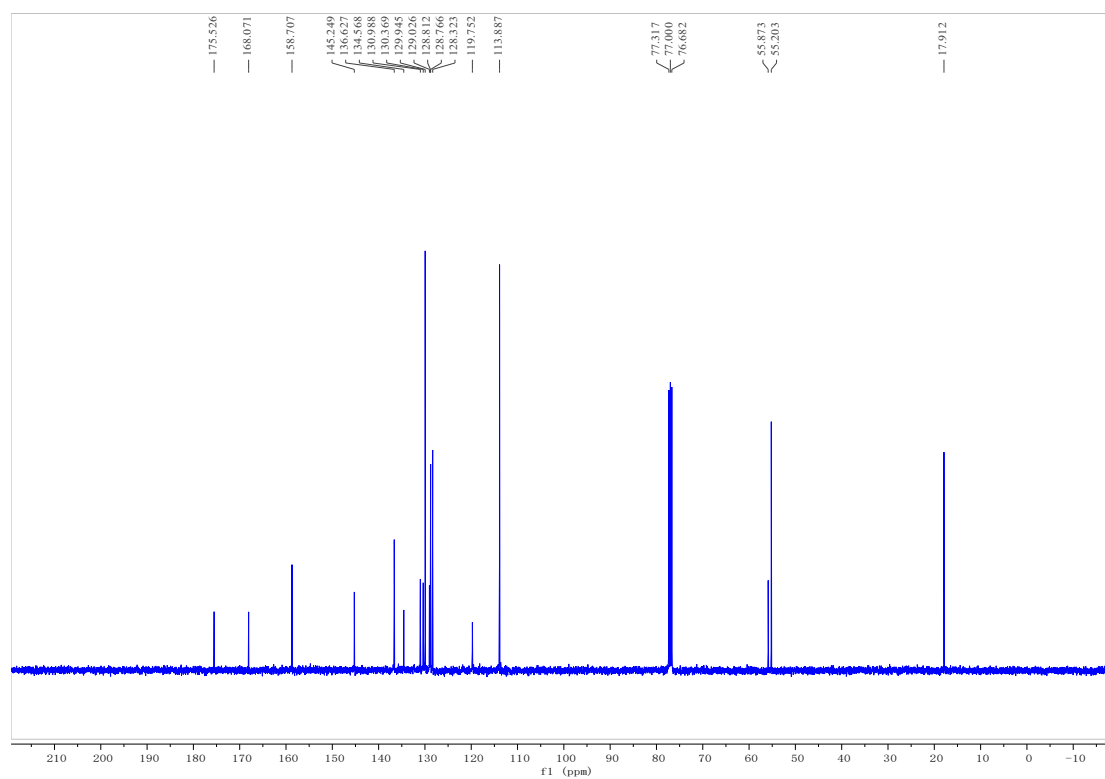 $^1\text{H}$  and  $^{13}\text{C}$  NMR Spectra for Compound 3ta: $^1\text{H}$  NMR (400 MHz,  $\text{CDCl}_3$ )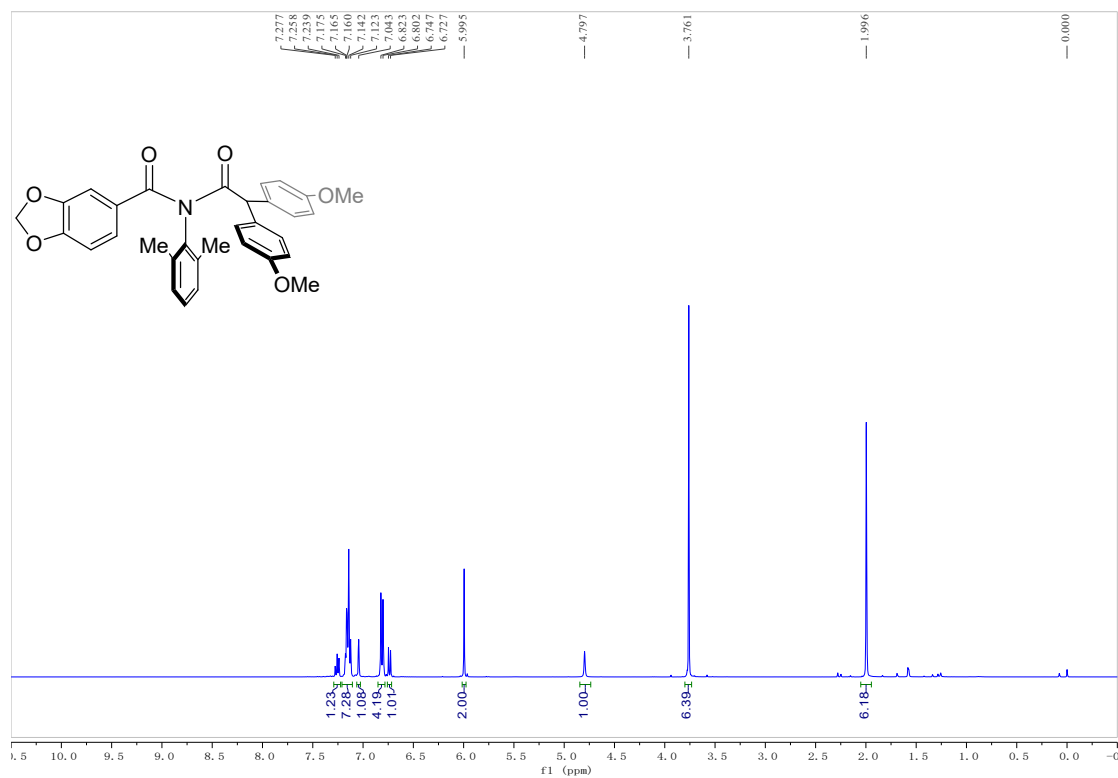



$^{13}\text{C}$  NMR (100 MHz,  $\text{CDCl}_3$ )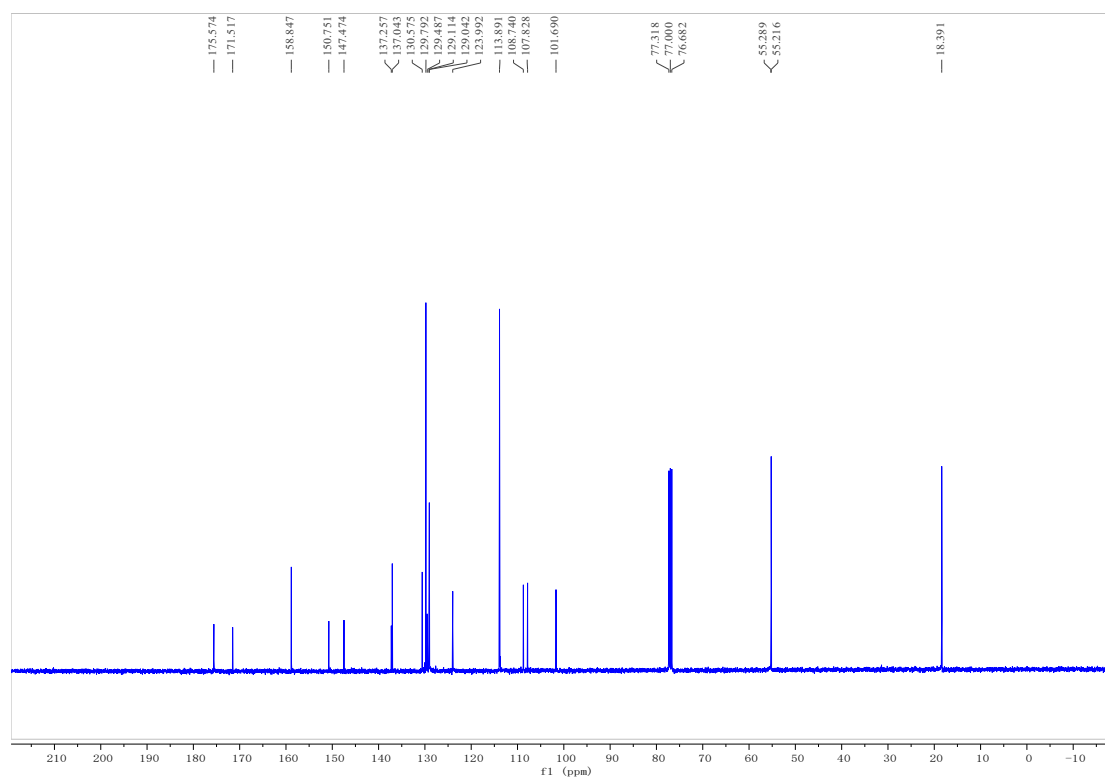 $^1\text{H}$  and  $^{13}\text{C}$  NMR Spectra for Compound 3ua: $^1\text{H}$  NMR (400 MHz,  $\text{CDCl}_3$ )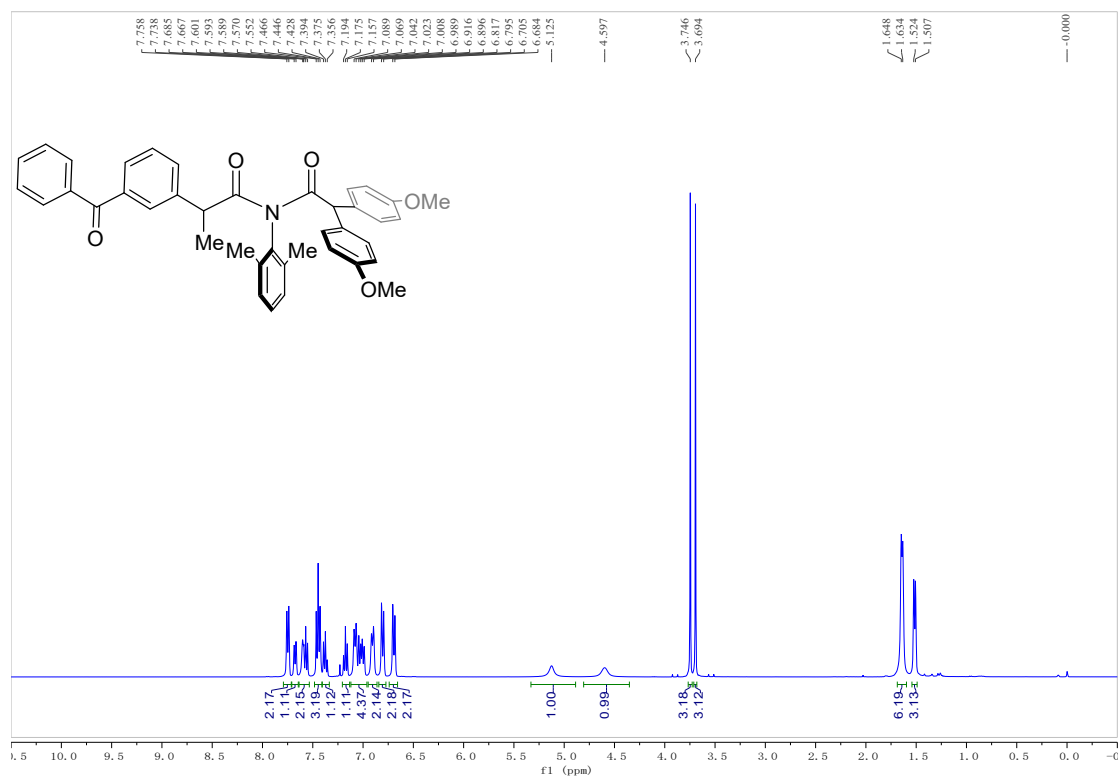

$^{13}\text{C}$  NMR (100 MHz,  $\text{CDCl}_3$ )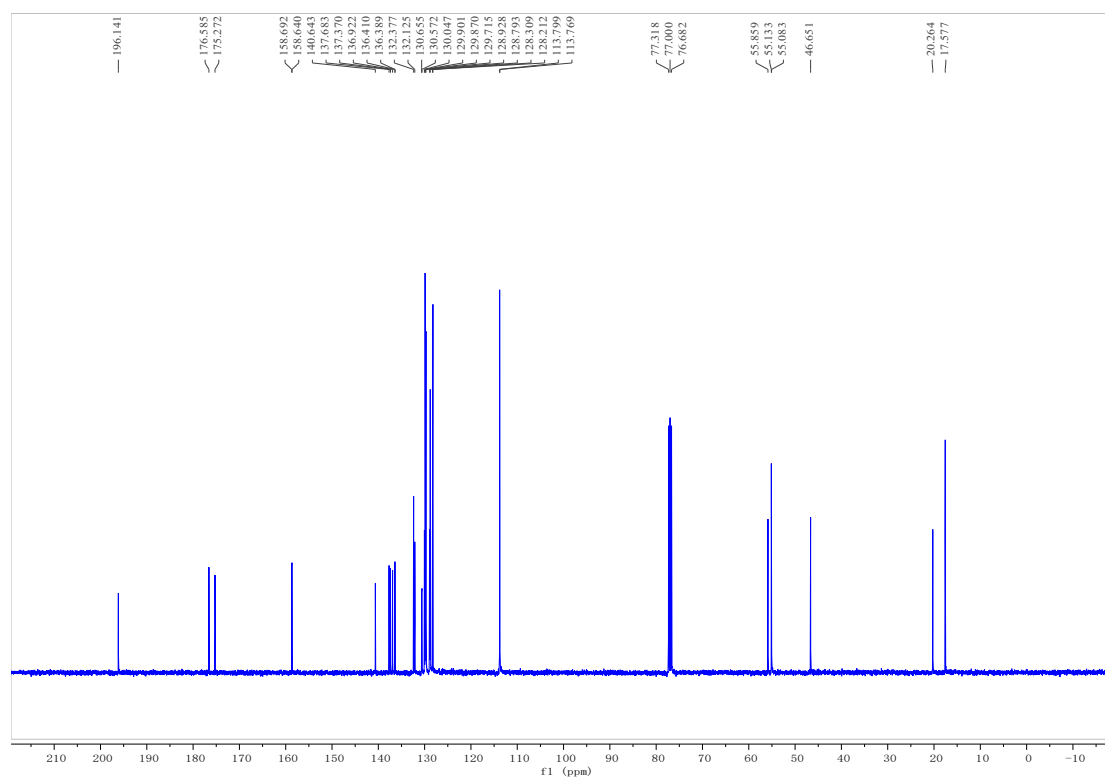 $^1\text{H}$  and  $^{13}\text{C}$  NMR Spectra for Compound 3va: $^1\text{H}$  NMR (400 MHz,  $\text{CDCl}_3$ )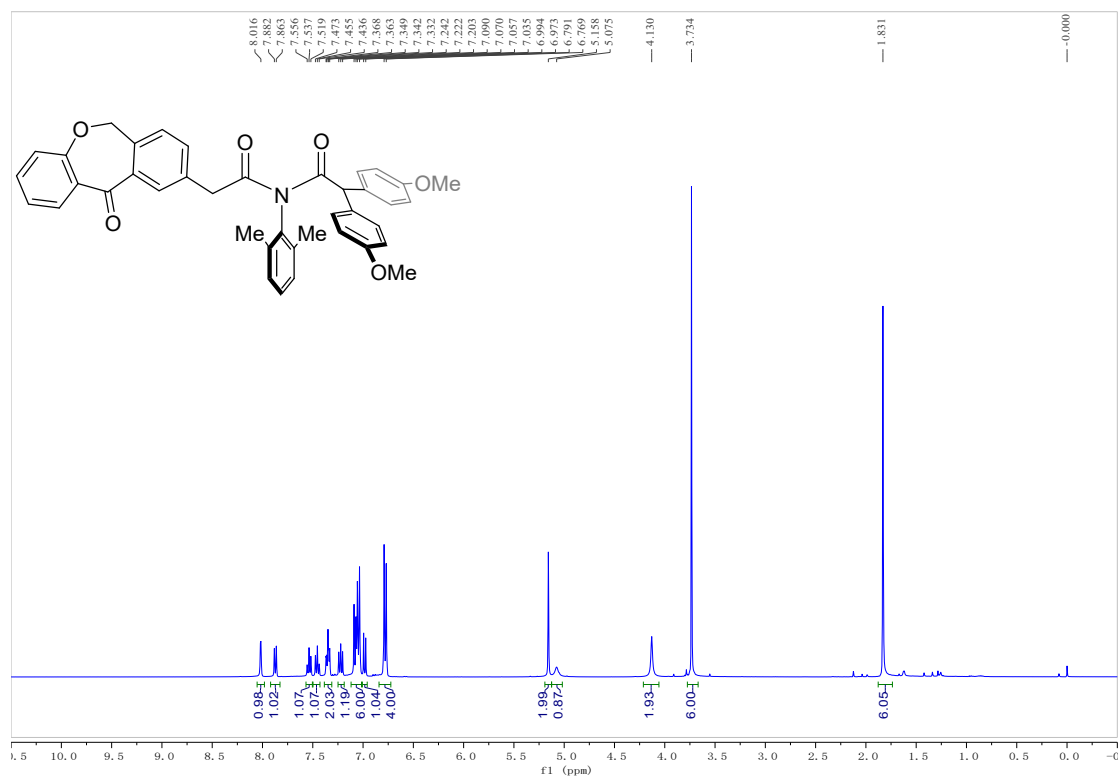

$^{13}\text{C}$  NMR (100 MHz,  $\text{CDCl}_3$ )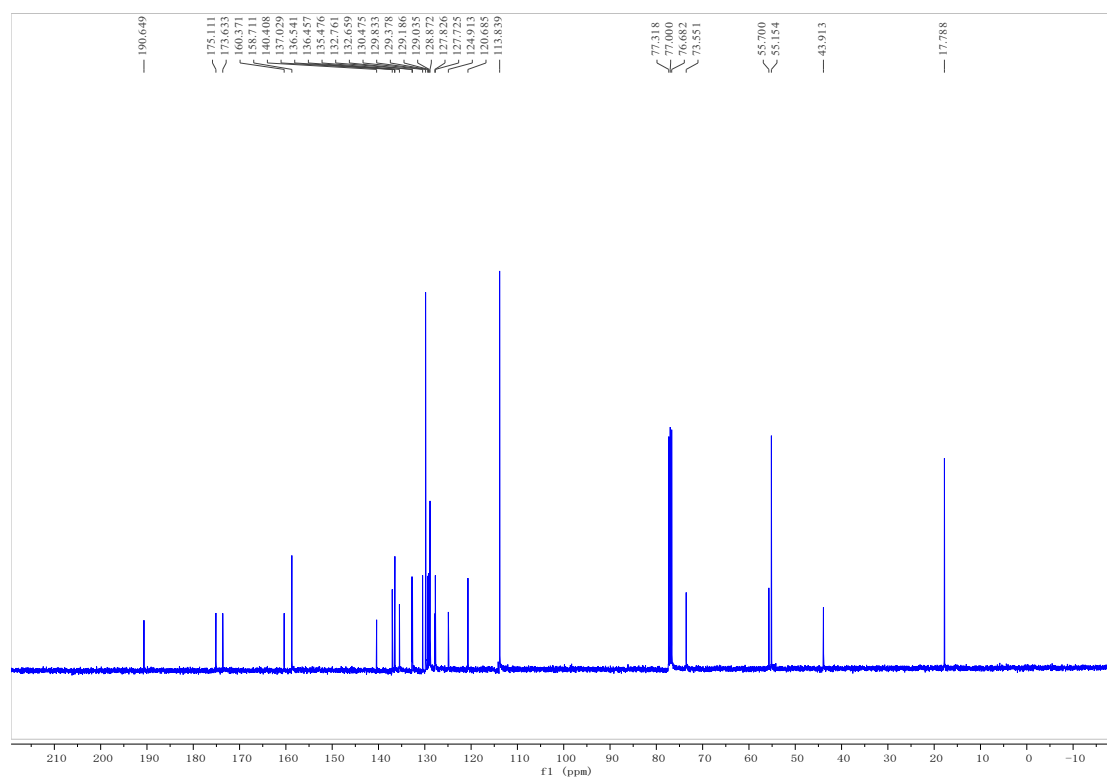 $^1\text{H}$  and  $^{13}\text{C}$  NMR Spectra for Compound 3wa: $^1\text{H}$  NMR (400 MHz,  $\text{CDCl}_3$ )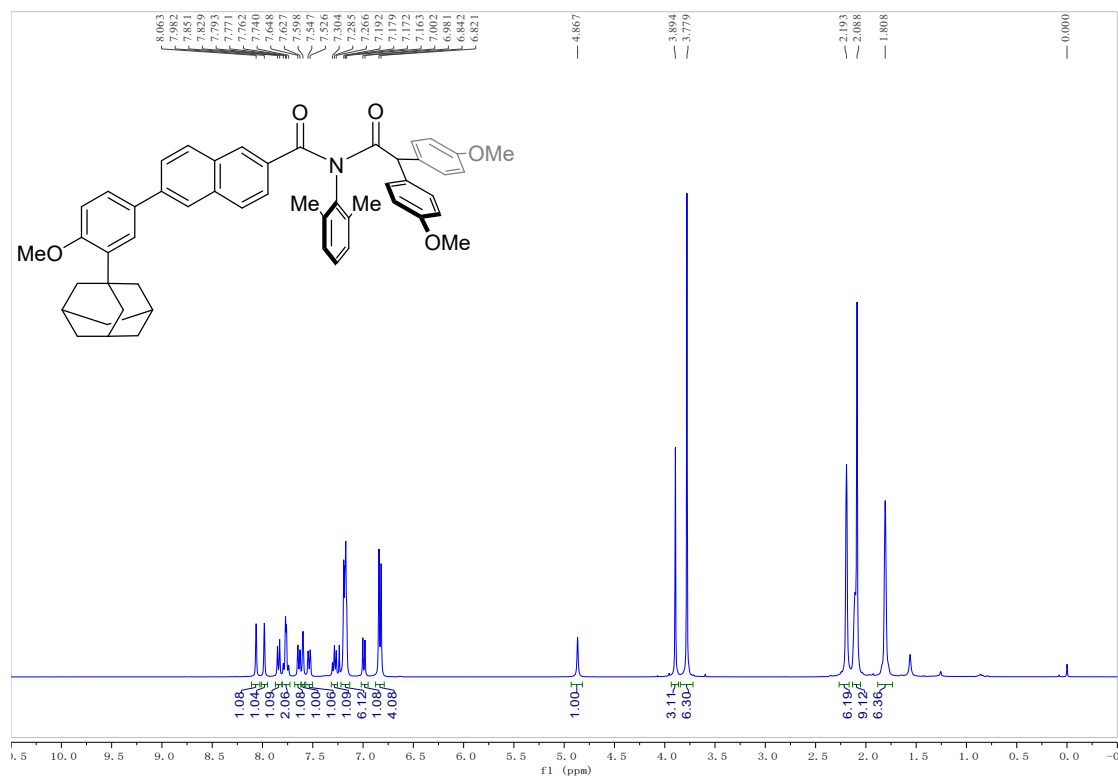

$^{13}\text{C}$  NMR (100 MHz,  $\text{CDCl}_3$ )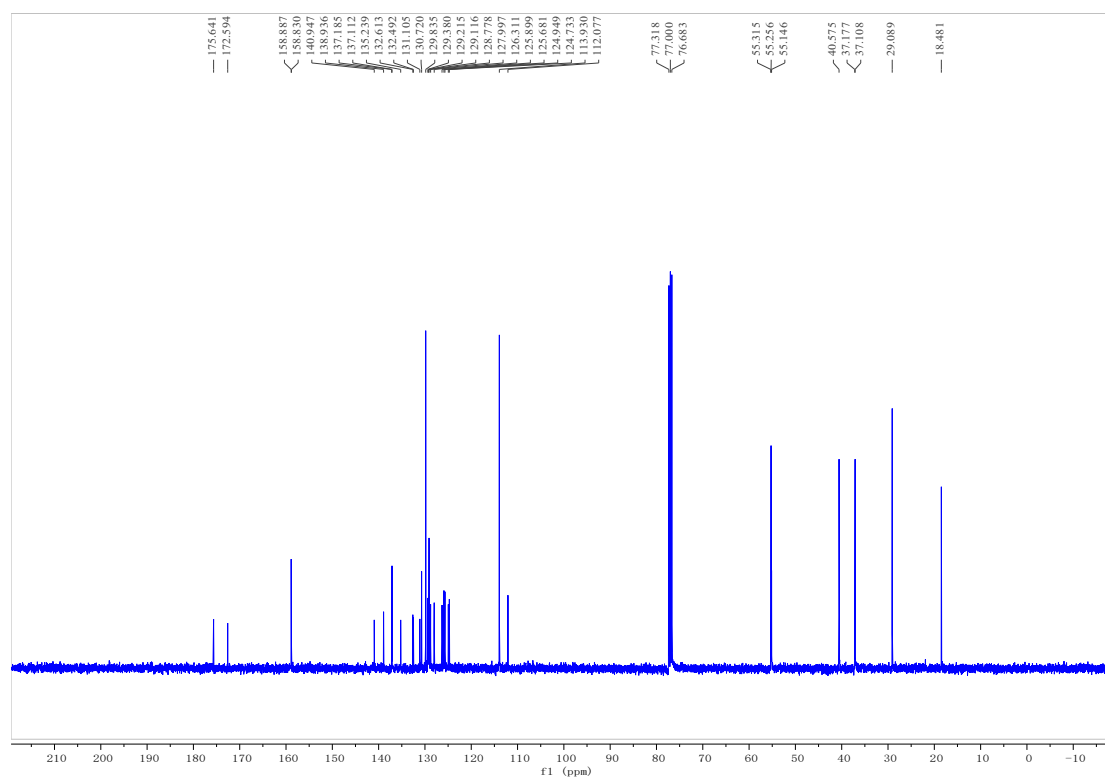 $^1\text{H}$  and  $^{13}\text{C}$  NMR Spectra for Compound 3xa: $^1\text{H}$  NMR (400 MHz,  $\text{CDCl}_3$ )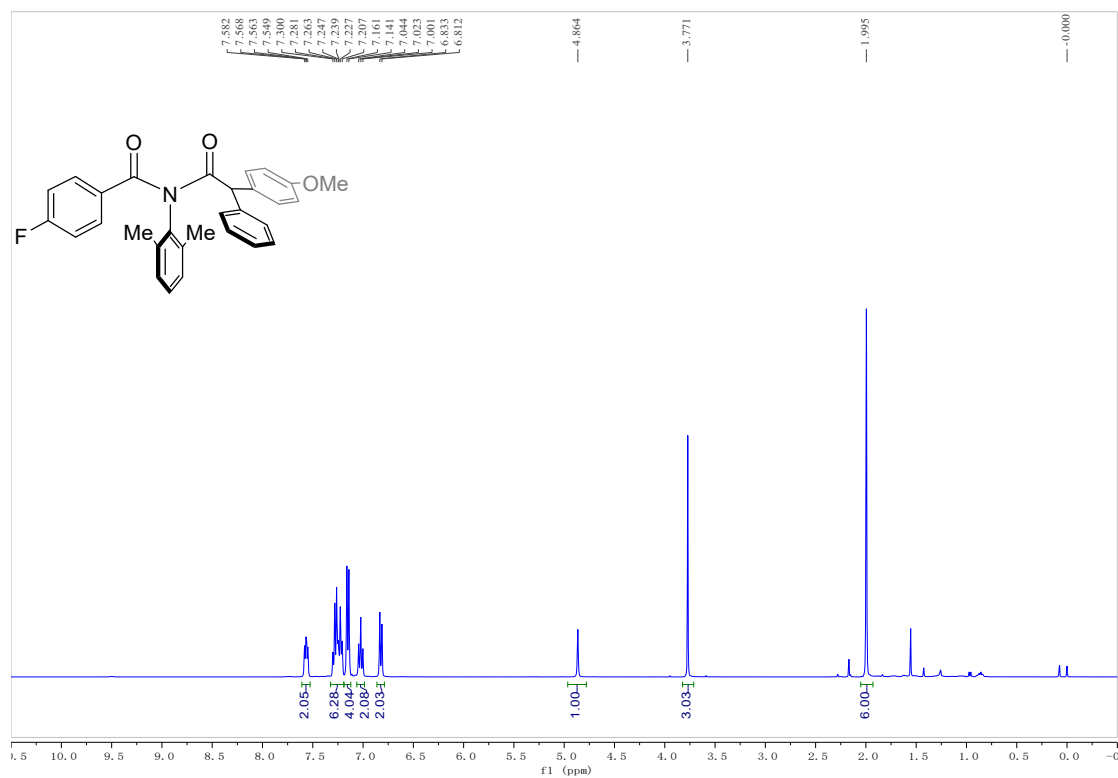

$^{13}\text{C}$  NMR (100 MHz,  $\text{CDCl}_3$ )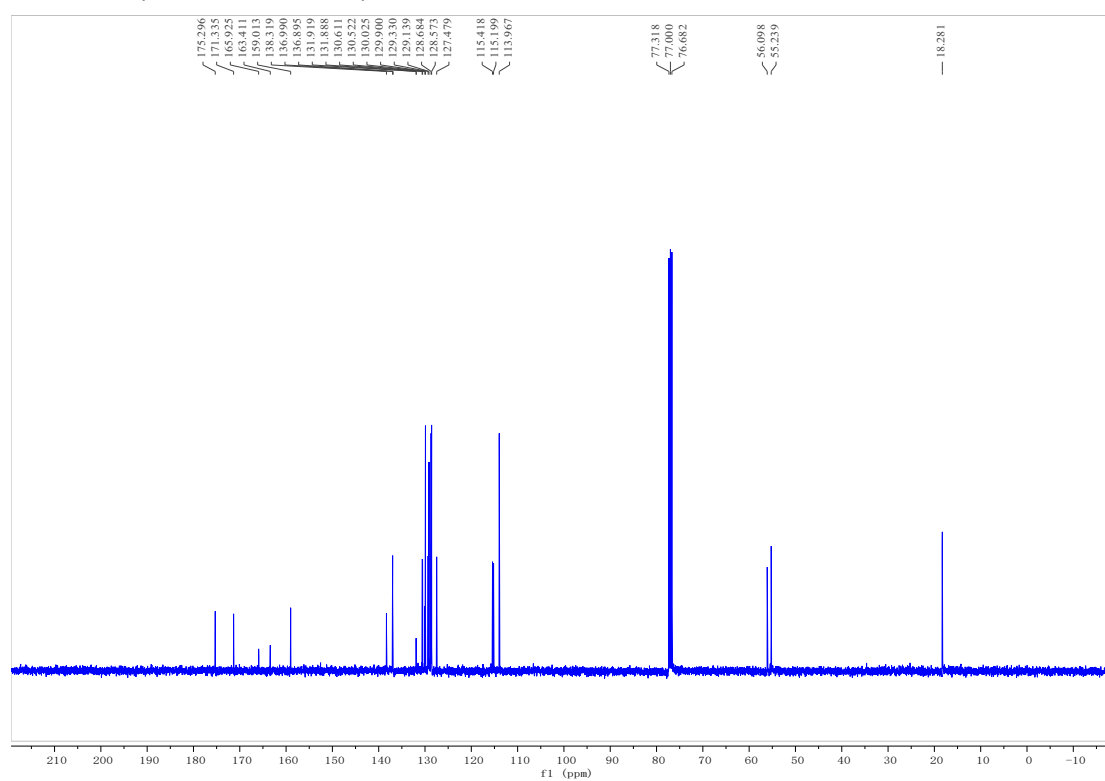 $^{19}\text{F}$  NMR (376 MHz,  $\text{CDCl}_3$ )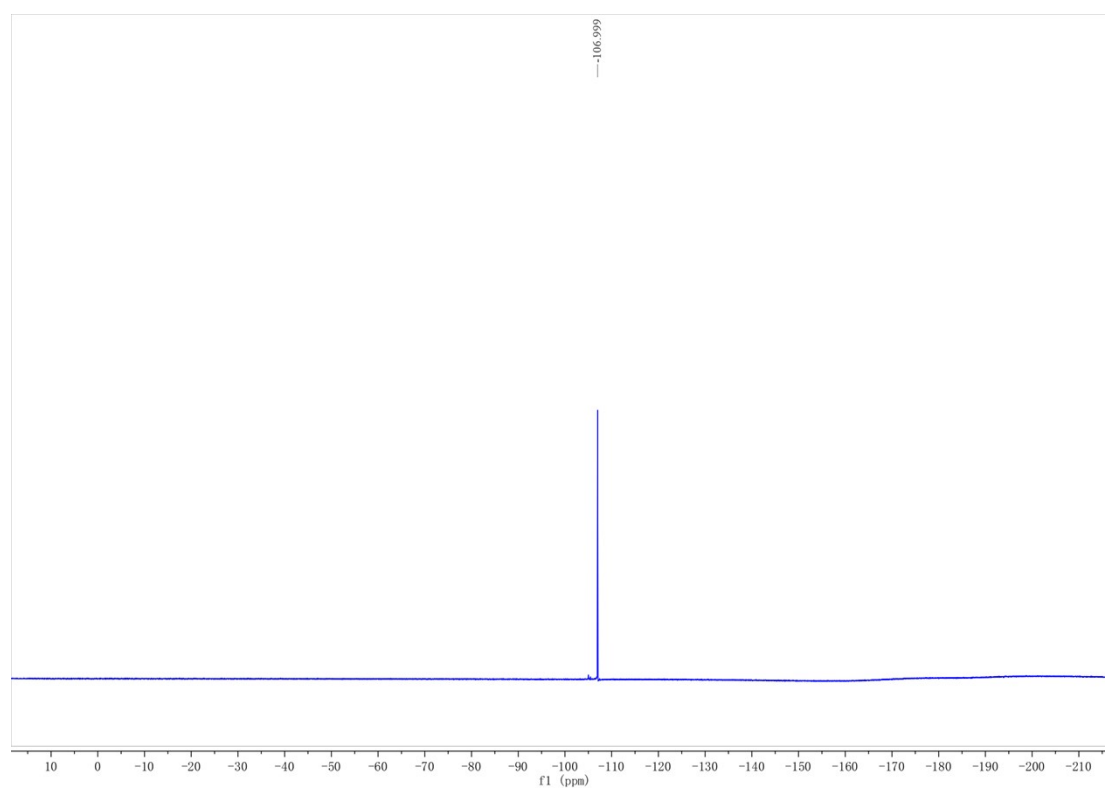

**$^1\text{H}$  and  $^{13}\text{C}$  NMR Spectra for Compound 3ya:** $^1\text{H}$  NMR (400 MHz,  $\text{CDCl}_3$ )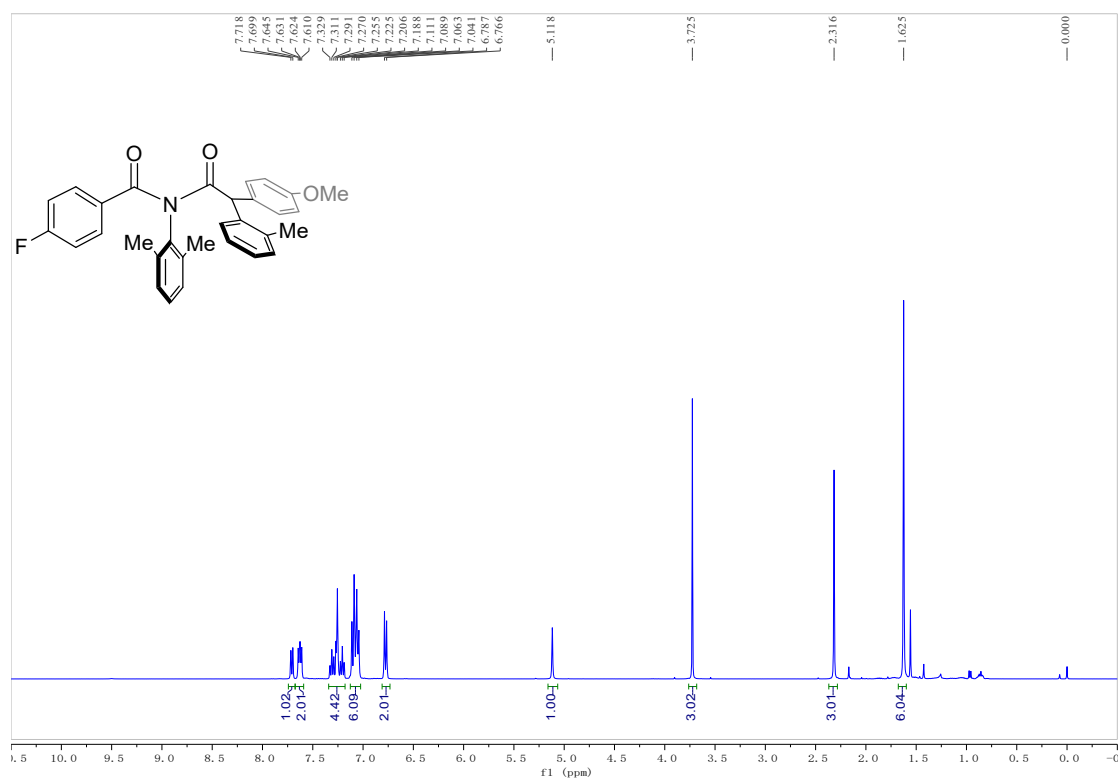 $^{13}\text{C}$  NMR (100 MHz,  $\text{CDCl}_3$ )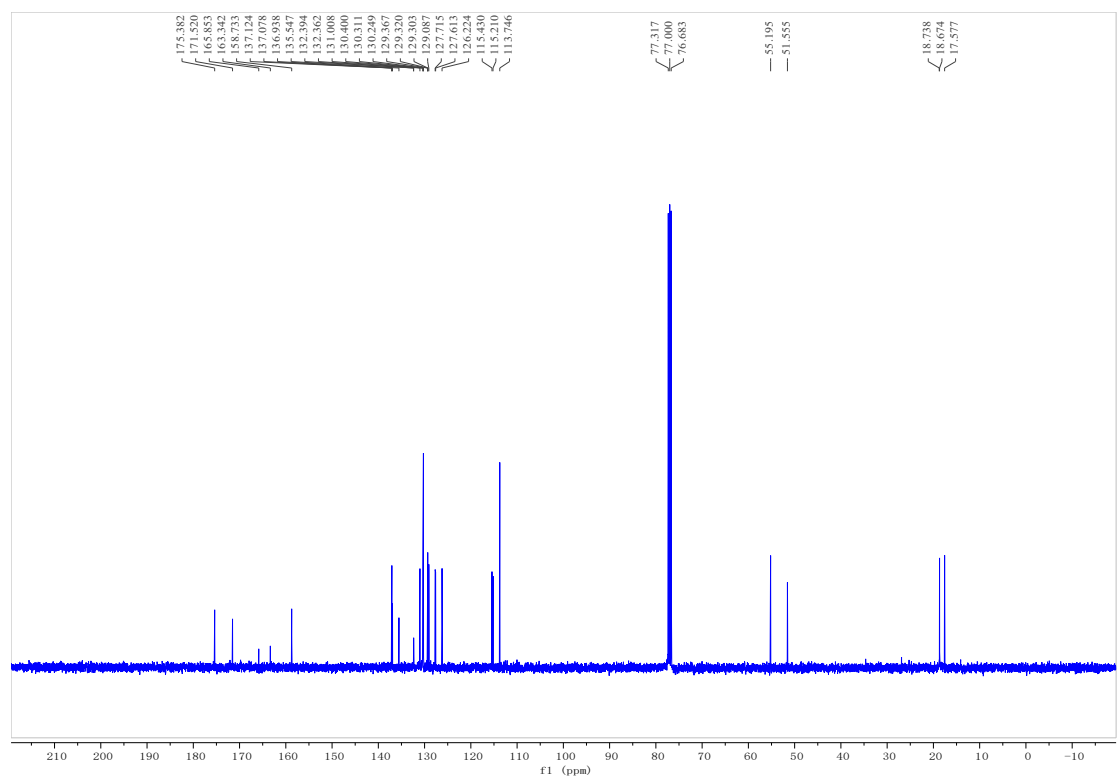

$^{19}\text{F}$  NMR (376 MHz,  $\text{CDCl}_3$ )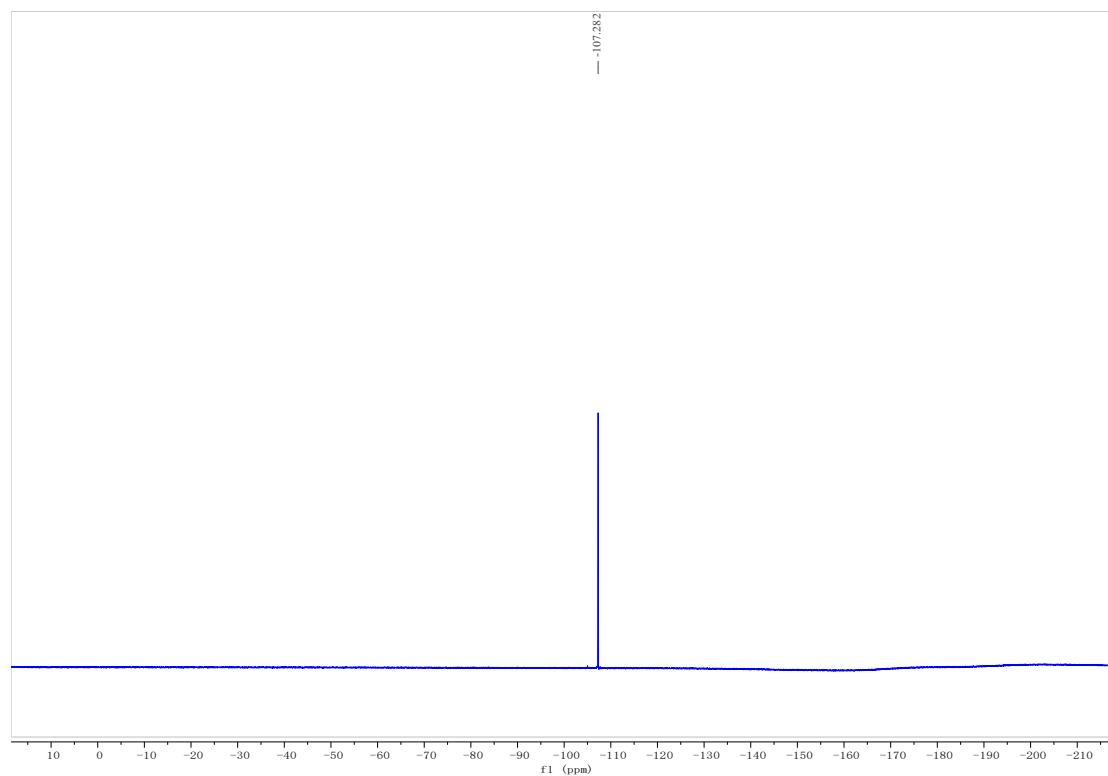 $^1\text{H}$  and  $^{13}\text{C}$  NMR Spectra for Compound 3za: $^1\text{H}$  NMR (400 MHz,  $\text{CDCl}_3$ )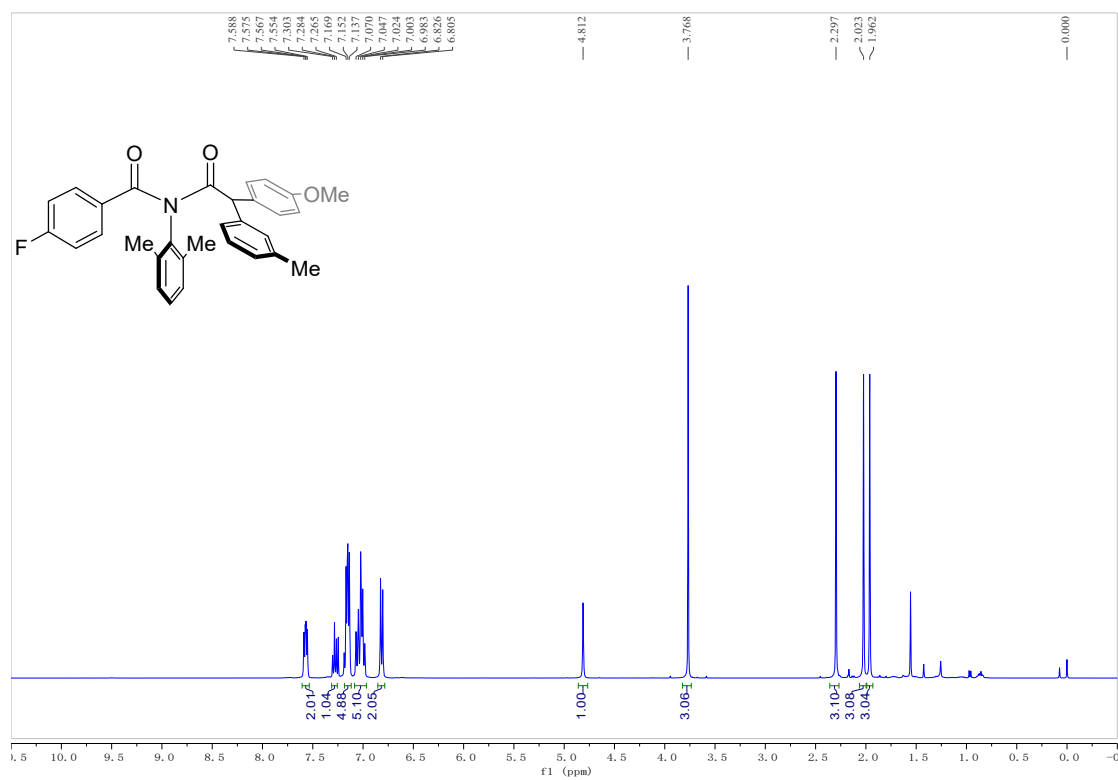

$^{13}\text{C}$  NMR (100 MHz,  $\text{CDCl}_3$ )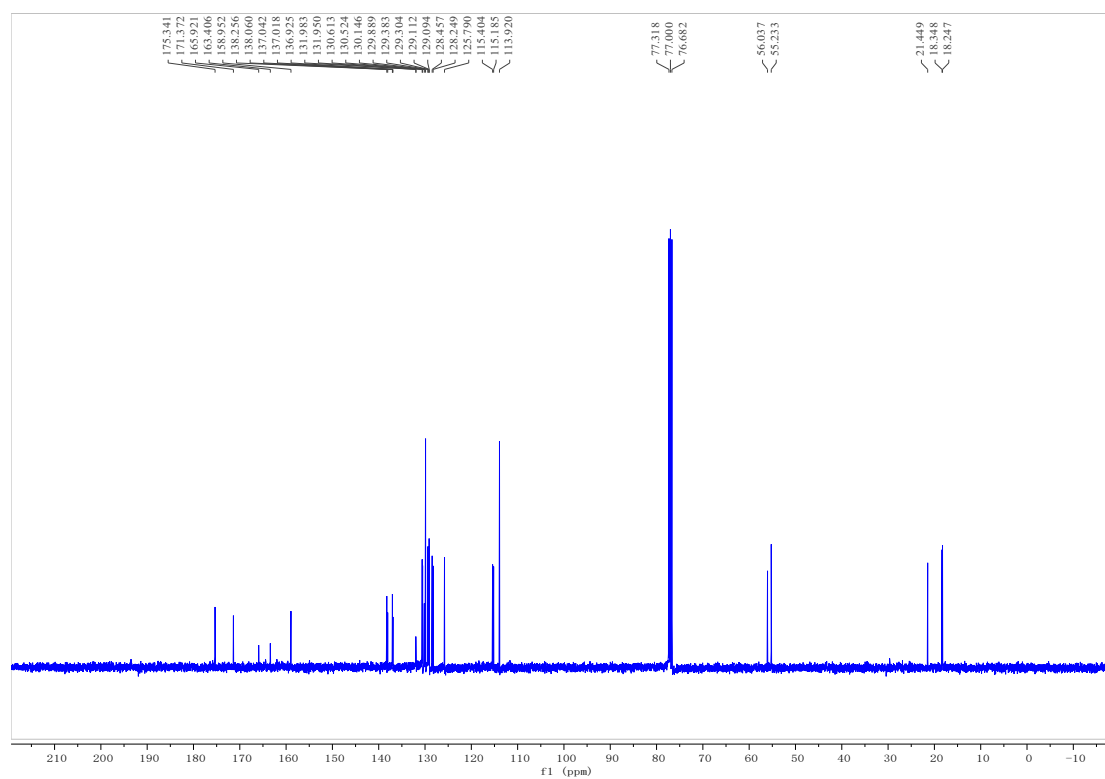 $^{19}\text{F}$  NMR (376 MHz,  $\text{CDCl}_3$ )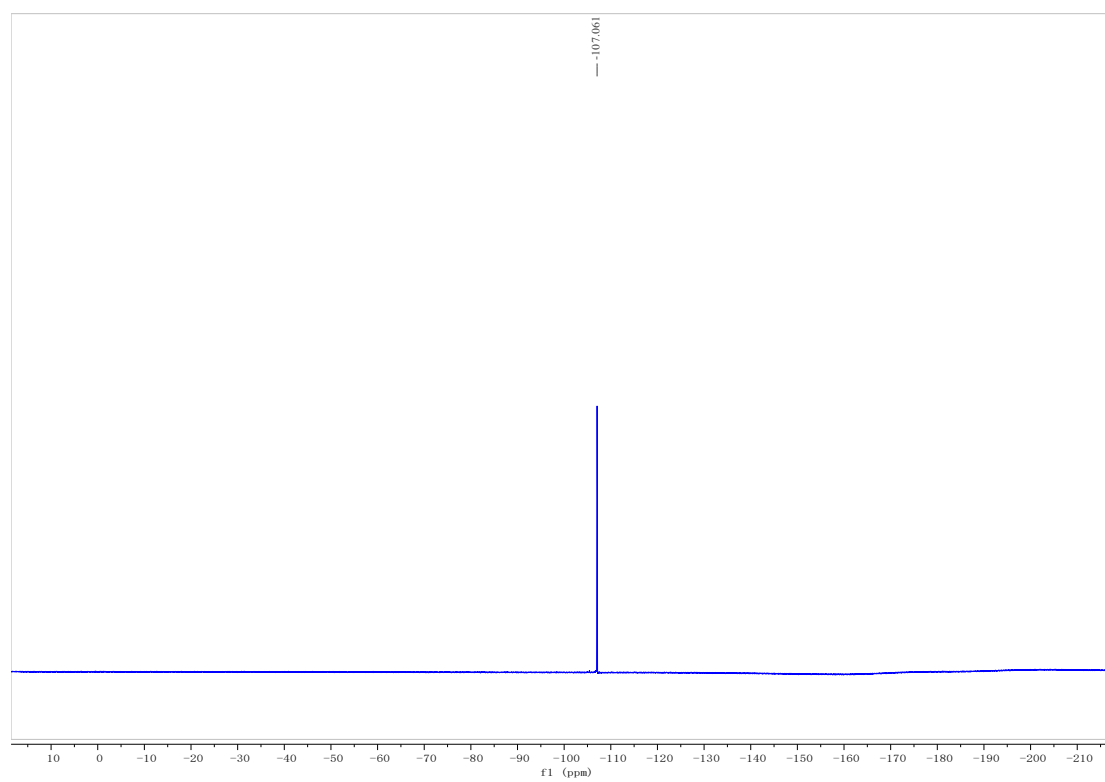



**<sup>1</sup>H and <sup>13</sup>C NMR Spectra for Compound 3aa-a:****<sup>1</sup>H NMR (400 MHz, CDCl<sub>3</sub>)**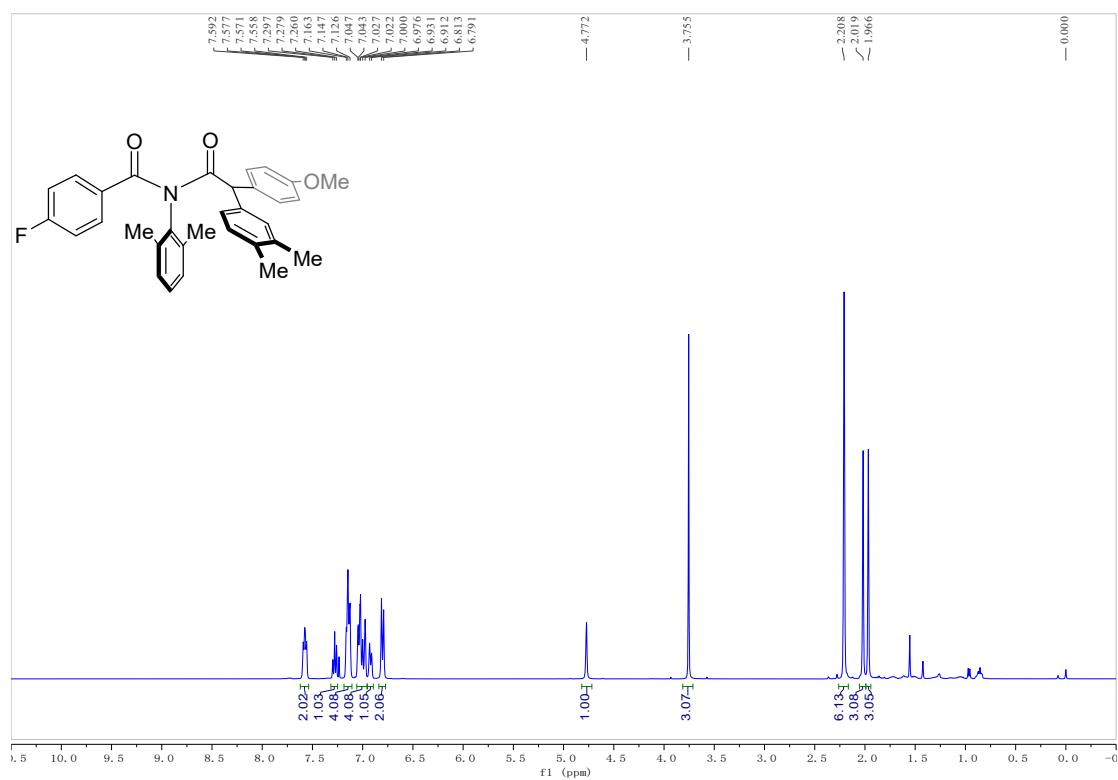**<sup>13</sup>C NMR (100 MHz, CDCl<sub>3</sub>)**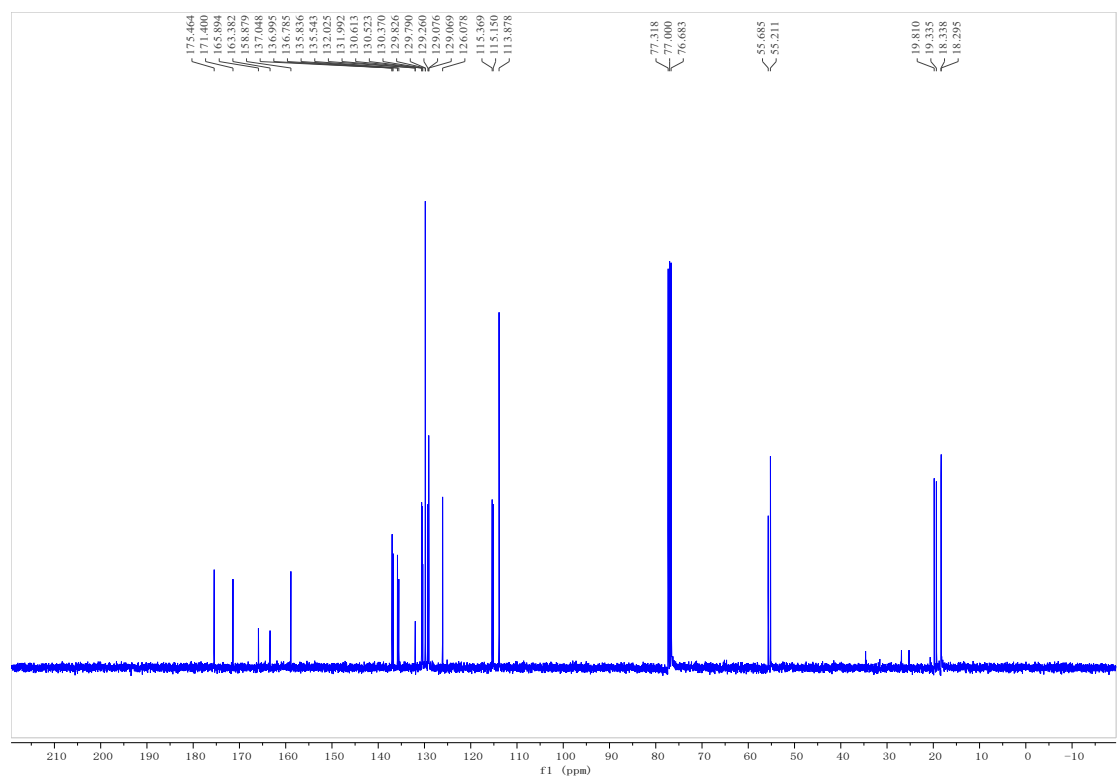

$^{19}\text{F}$  NMR (376 MHz,  $\text{CDCl}_3$ )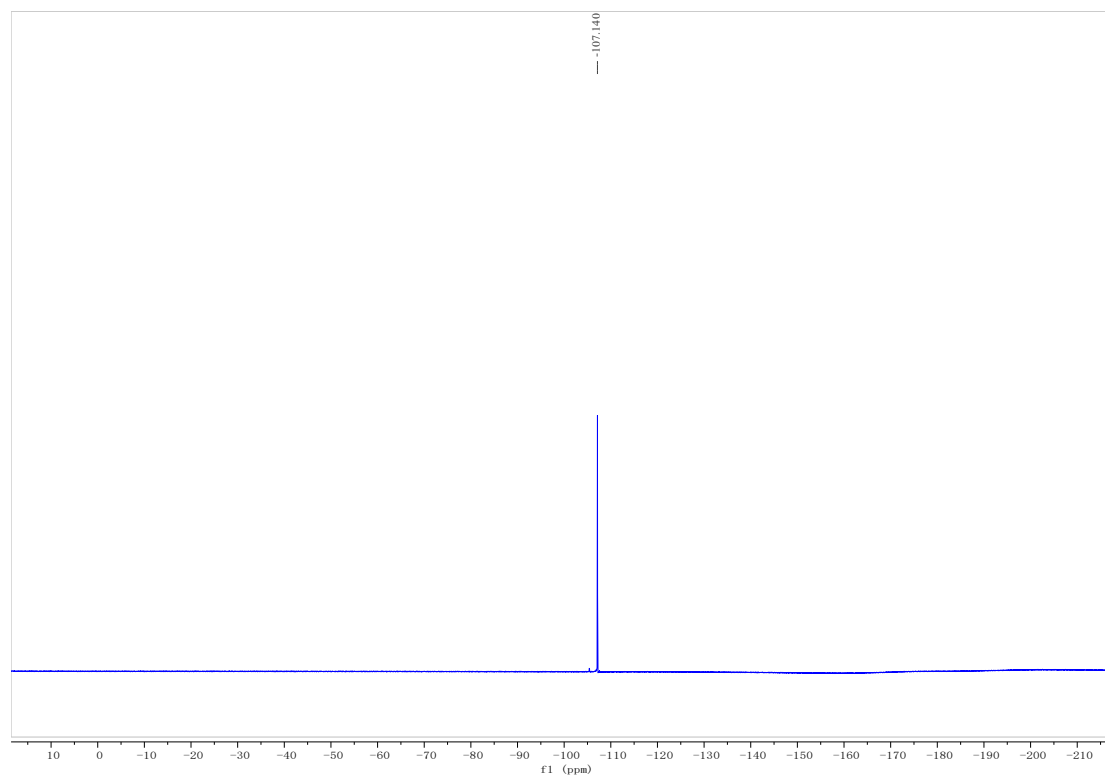 $^1\text{H}$  and  $^{13}\text{C}$  NMR Spectra for Compound 3ab-a: $^1\text{H}$  NMR (400 MHz,  $\text{CDCl}_3$ )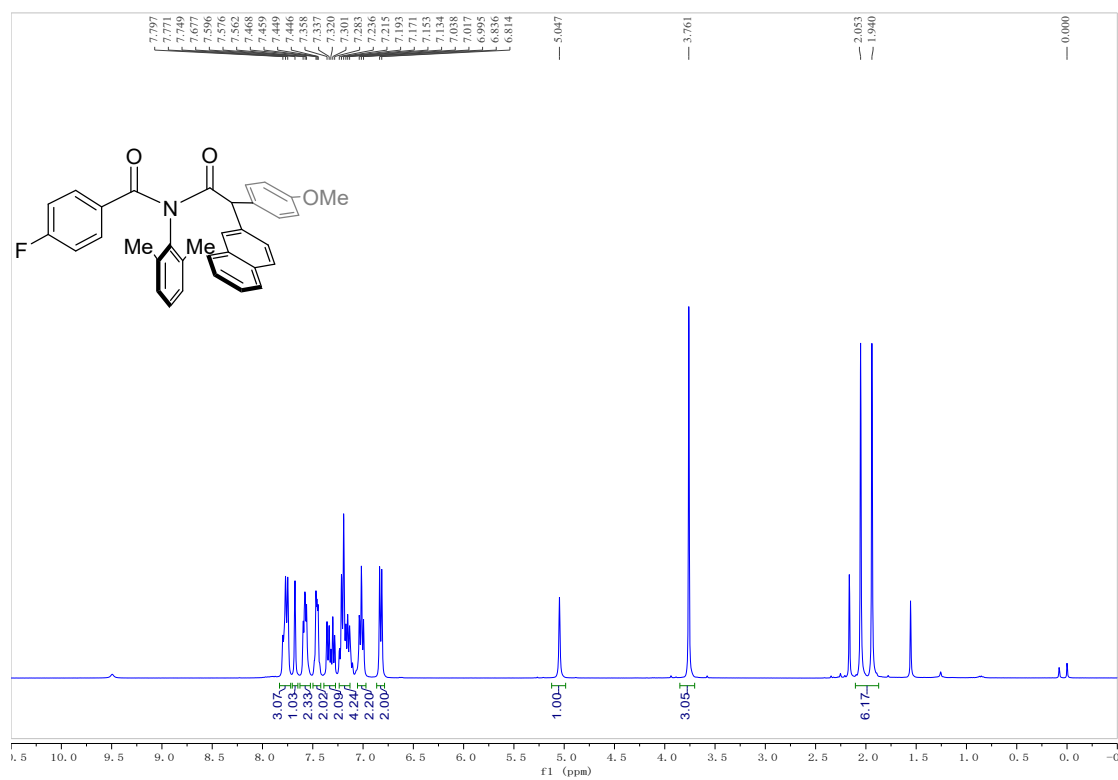

$^{13}\text{C}$  NMR (100 MHz,  $\text{CDCl}_3$ )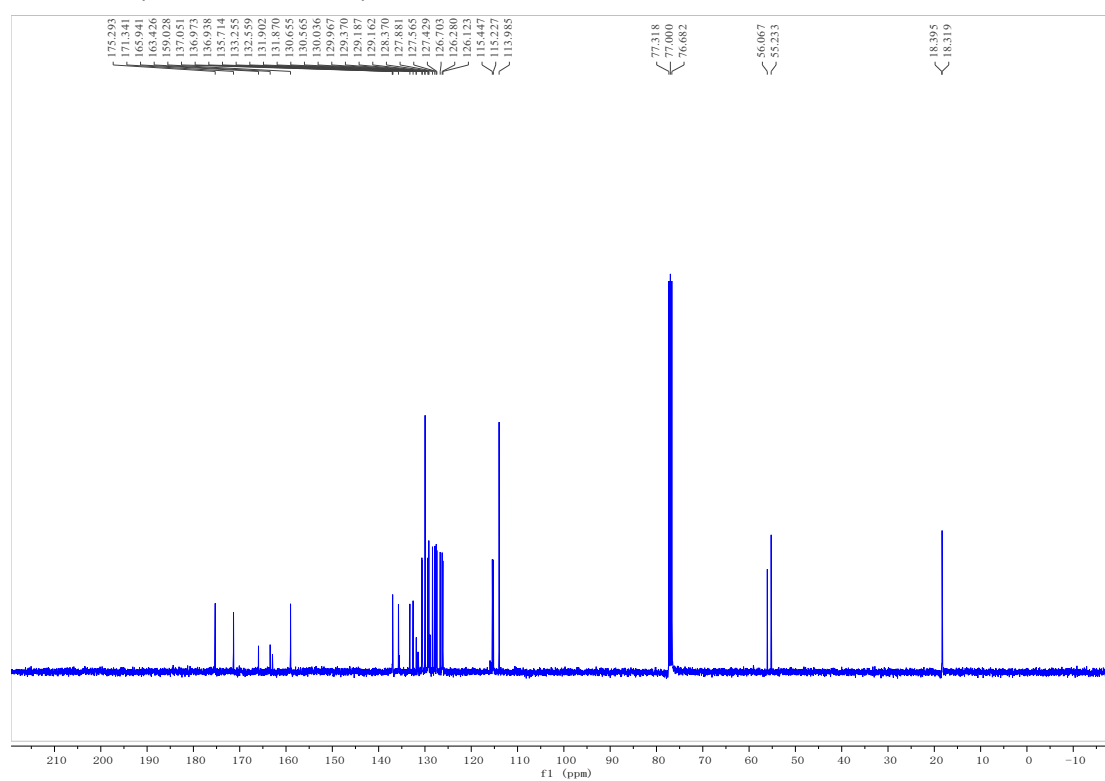 $^{19}\text{F}$  NMR (376 MHz,  $\text{CDCl}_3$ )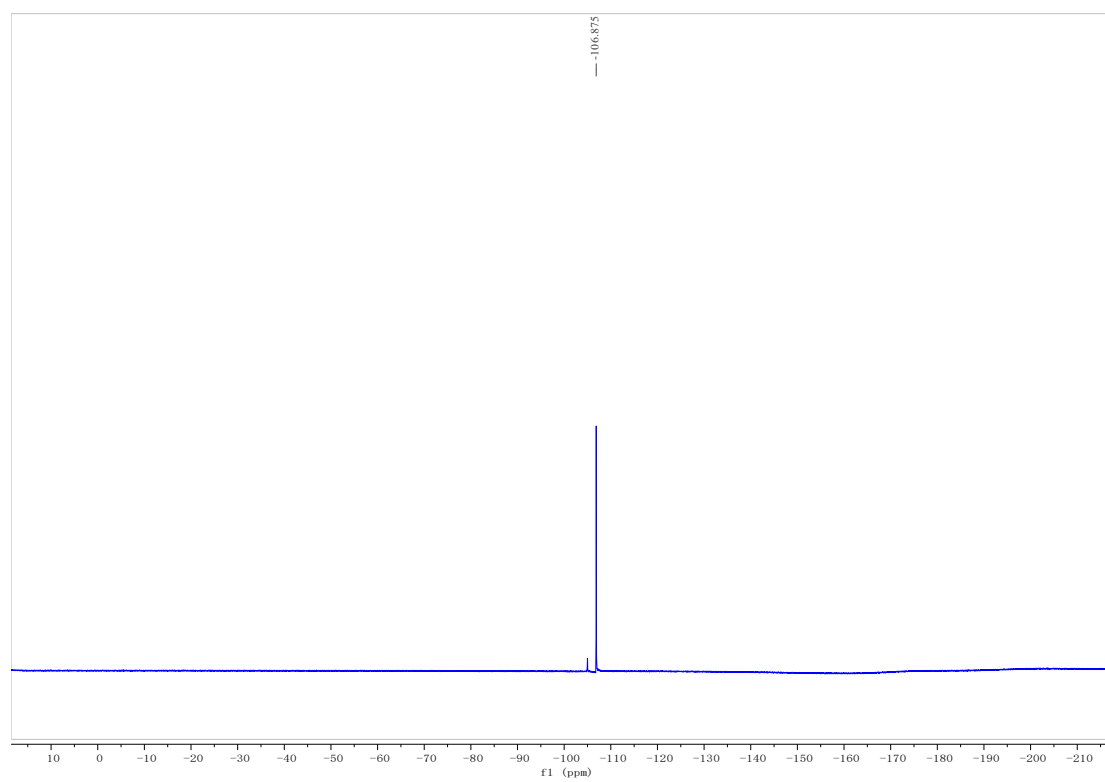

**<sup>1</sup>H and <sup>13</sup>C NMR Spectra for Compound 3ac-a:****<sup>1</sup>H NMR (400 MHz, CDCl<sub>3</sub>)**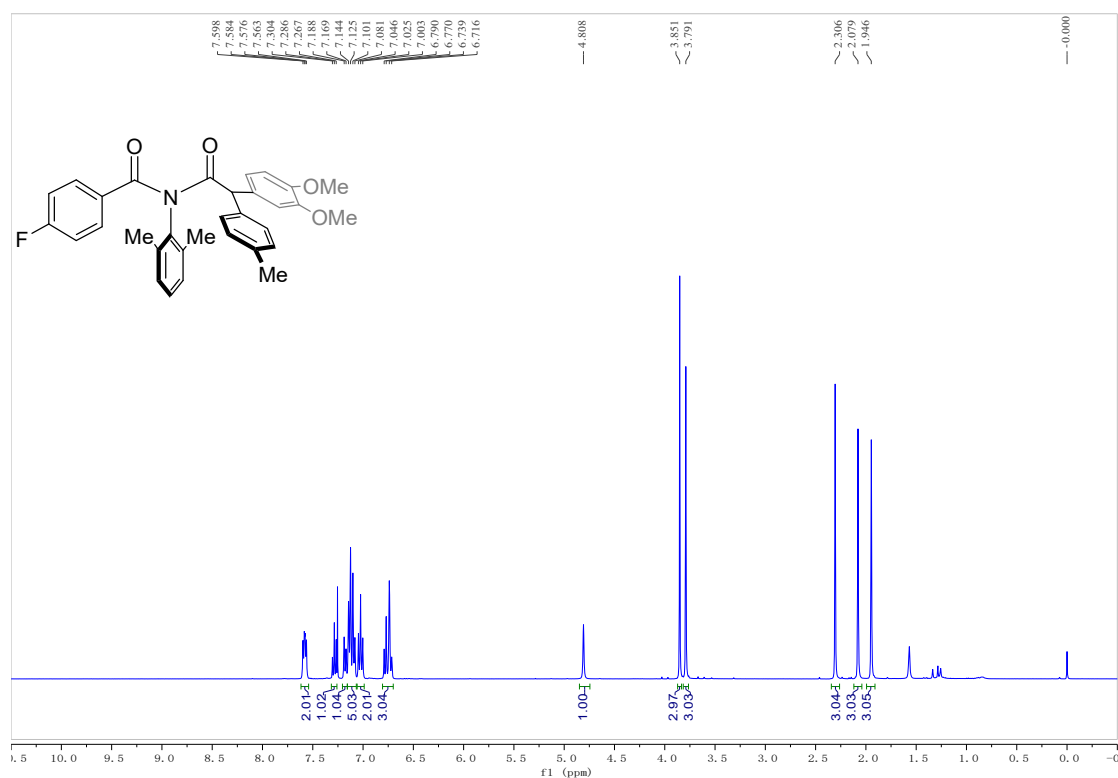**<sup>13</sup>C NMR (100 MHz, CDCl<sub>3</sub>)**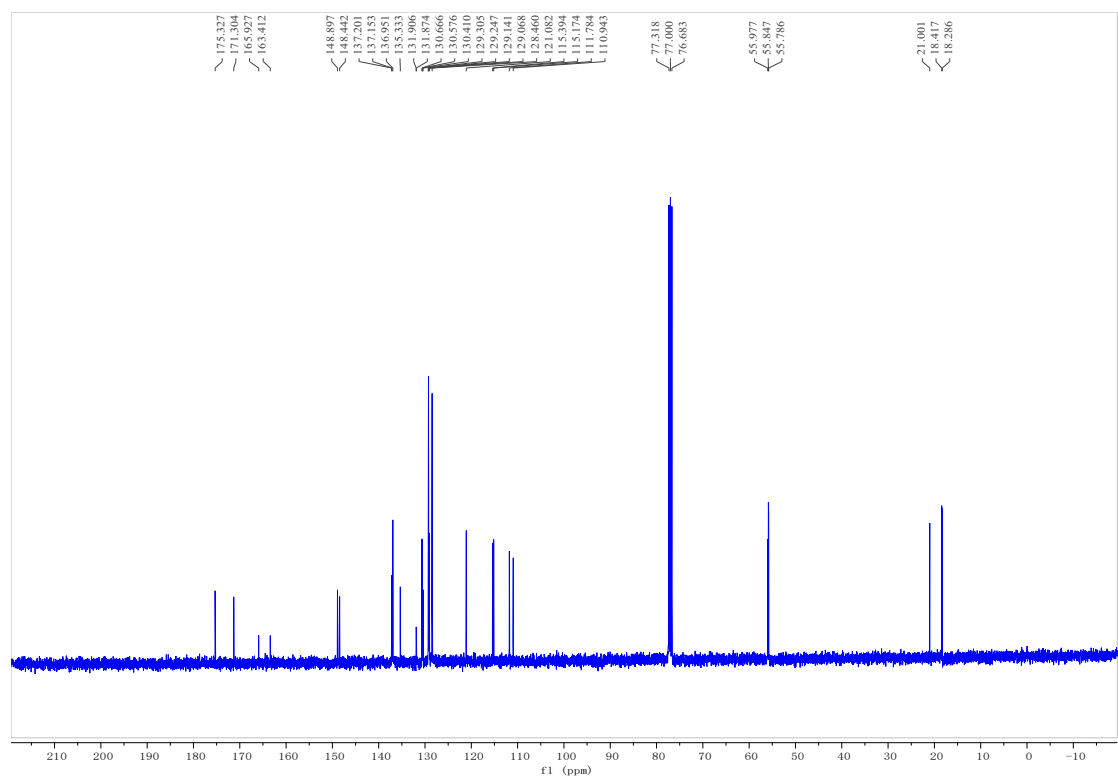

$^{19}\text{F}$  NMR (376 MHz,  $\text{CDCl}_3$ )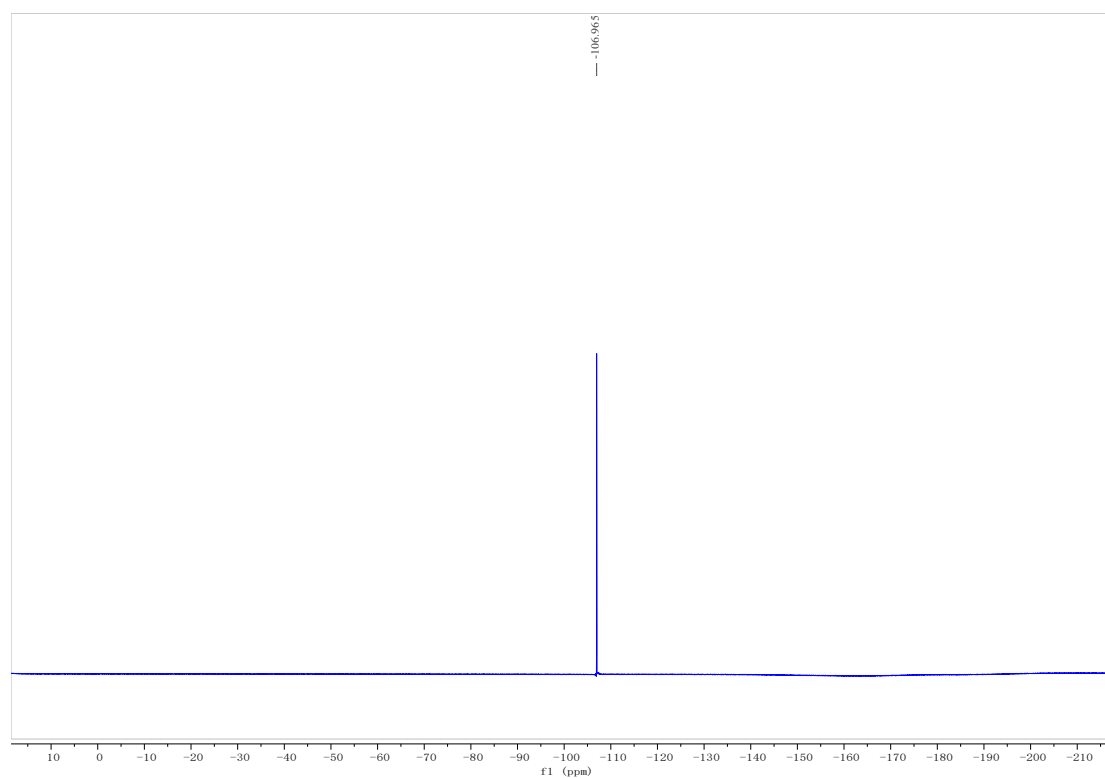 $^1\text{H}$  and  $^{13}\text{C}$  NMR Spectra for Compound 3ab: $^1\text{H}$  NMR (400 MHz,  $\text{CDCl}_3$ )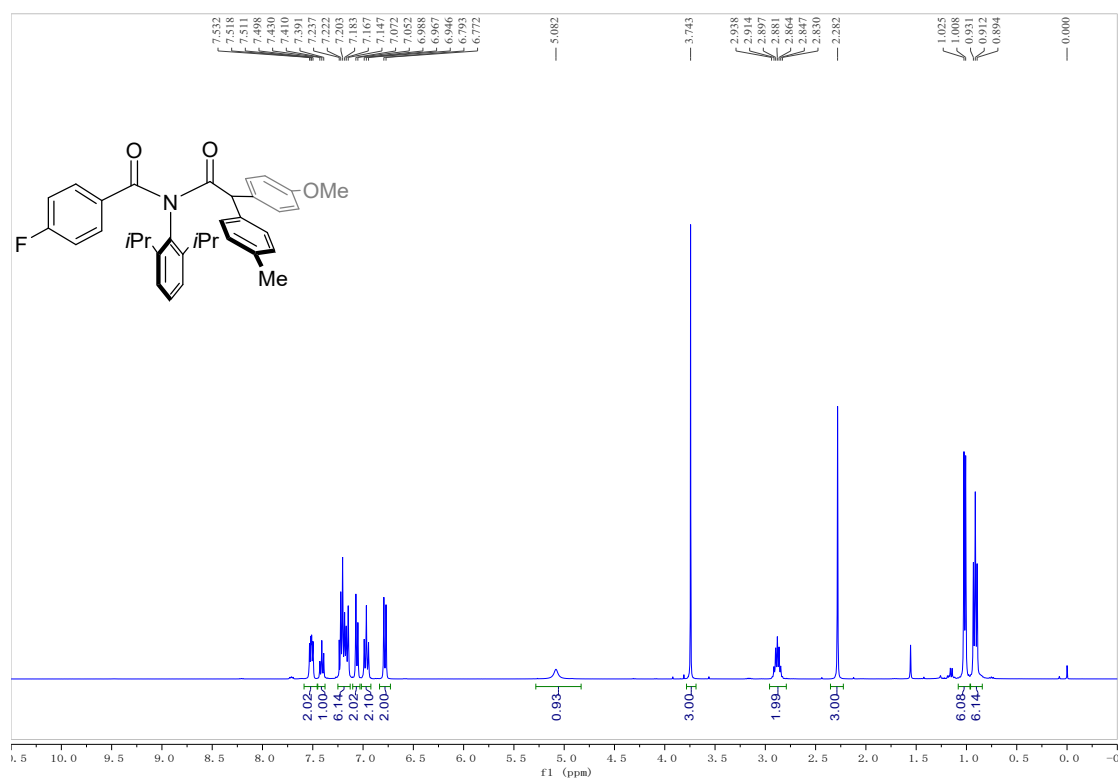

$^{13}\text{C}$  NMR (100 MHz,  $\text{CDCl}_3$ )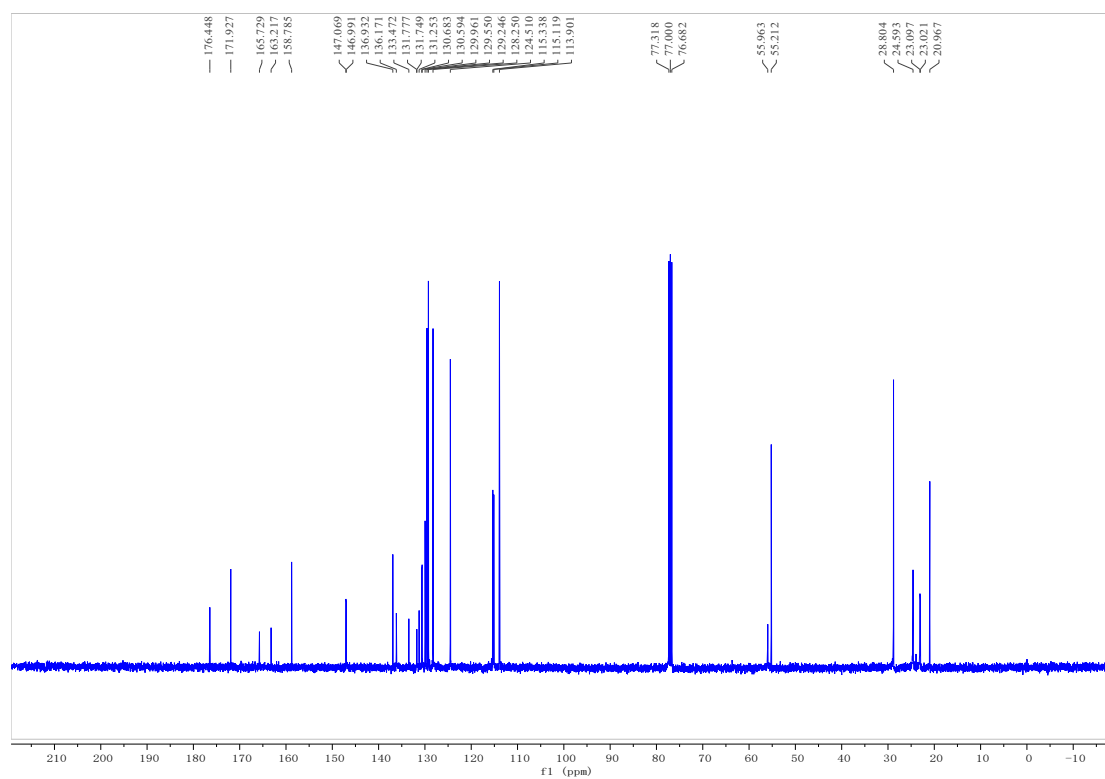 $^{19}\text{F}$  NMR (376 MHz,  $\text{CDCl}_3$ )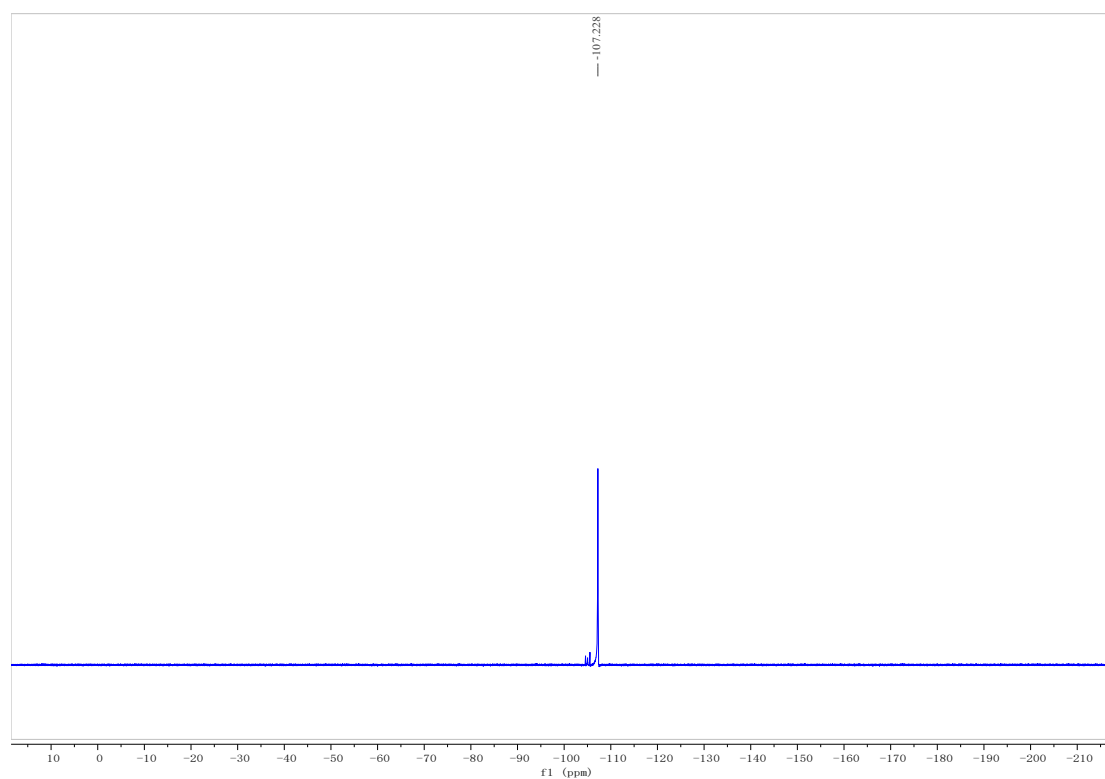

**$^1\text{H}$  and  $^{13}\text{C}$  NMR Spectra for Compound 3gc:** $^1\text{H}$  NMR (400 MHz,  $\text{CDCl}_3$ )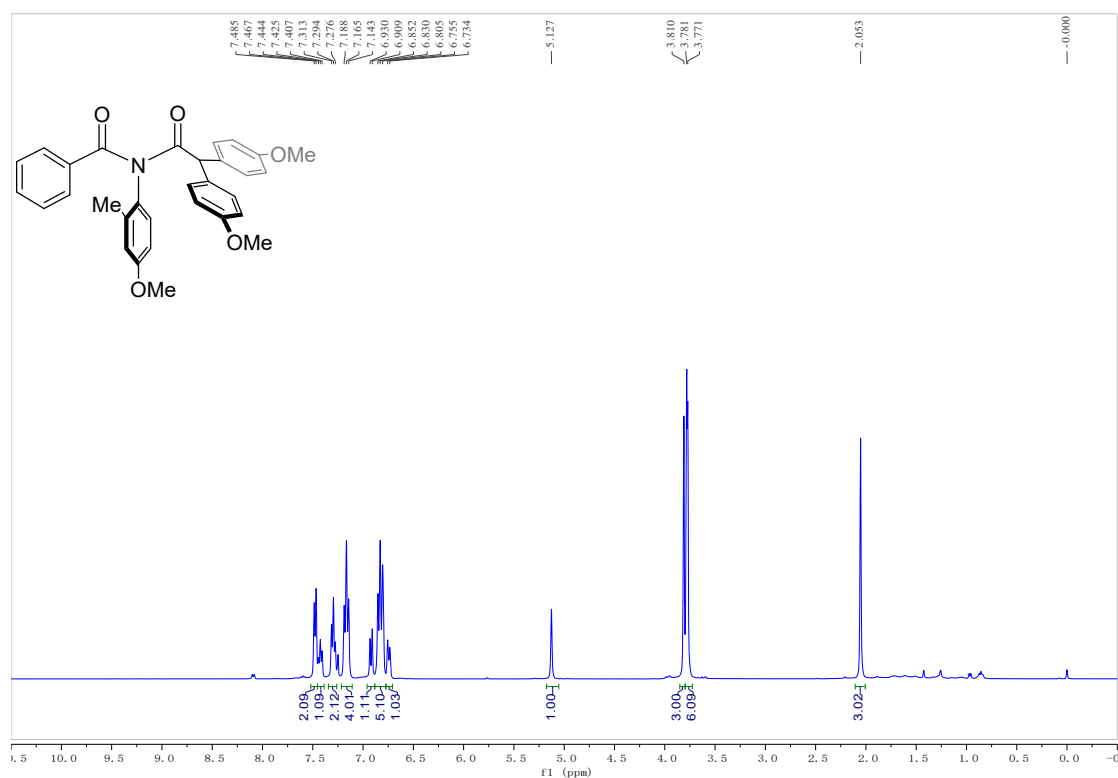 $^{13}\text{C}$  NMR (100 MHz,  $\text{CDCl}_3$ )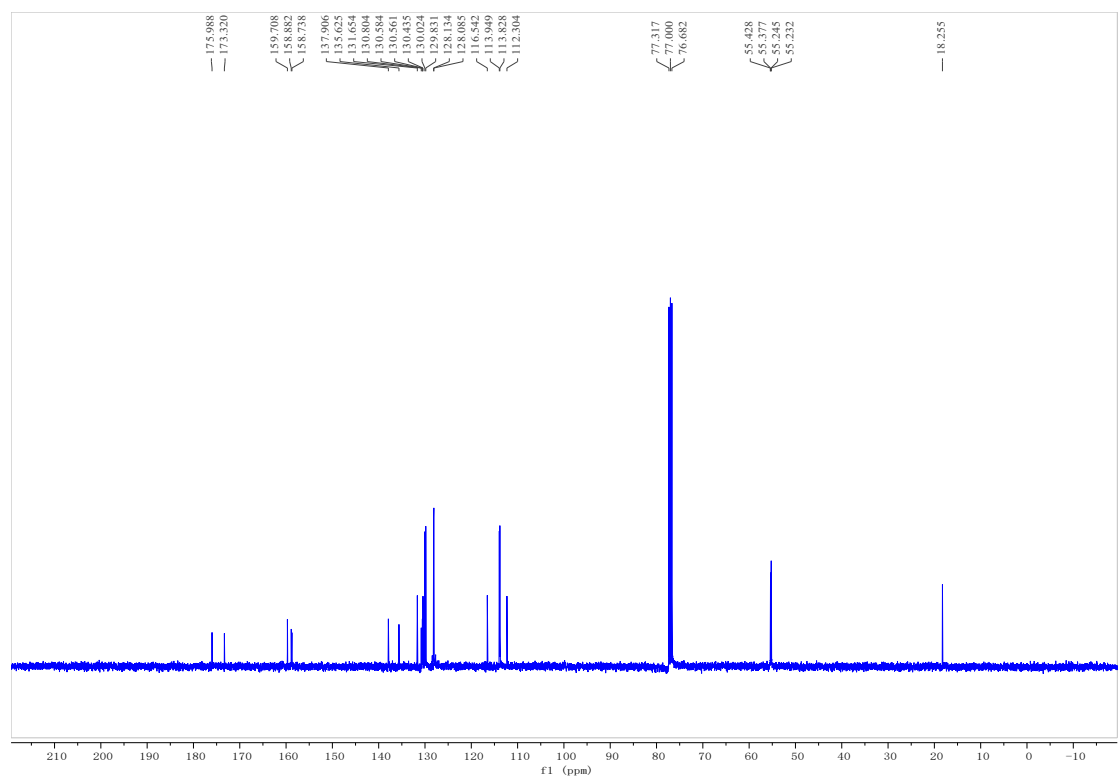

**$^1\text{H}$  and  $^{13}\text{C}$  NMR Spectra for Compound 3gd:** $^1\text{H}$  NMR (400 MHz,  $\text{CDCl}_3$ )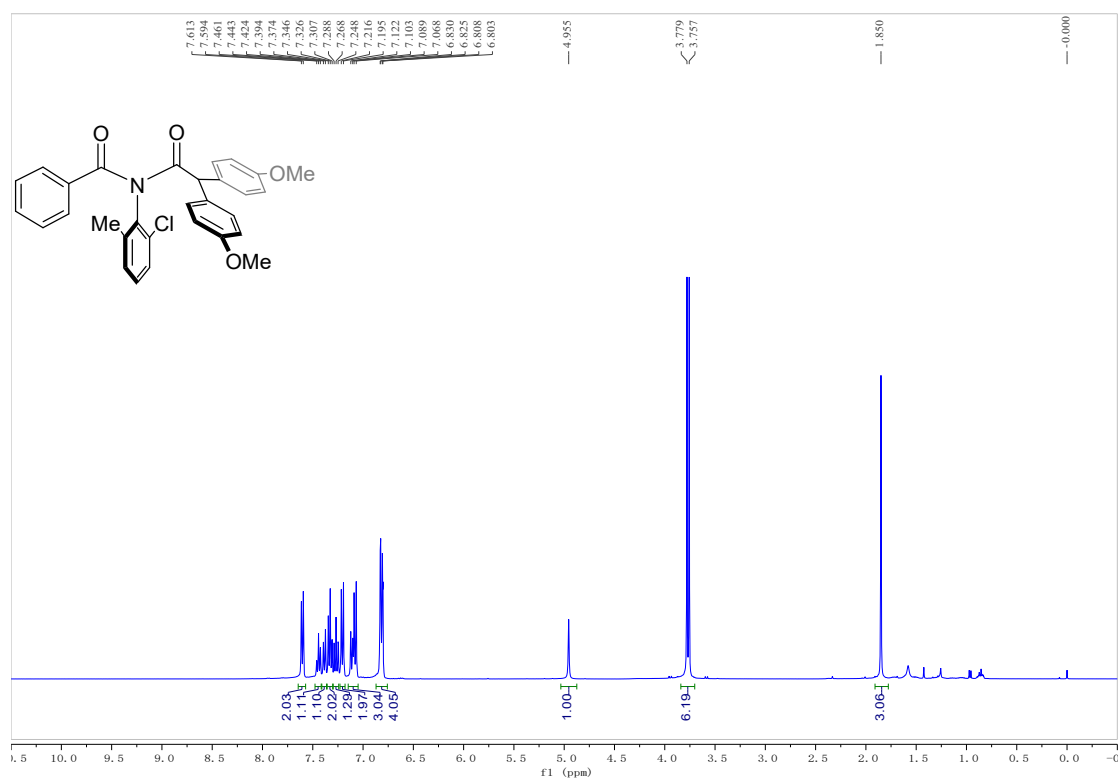 $^{13}\text{C}$  NMR (100 MHz,  $\text{CDCl}_3$ )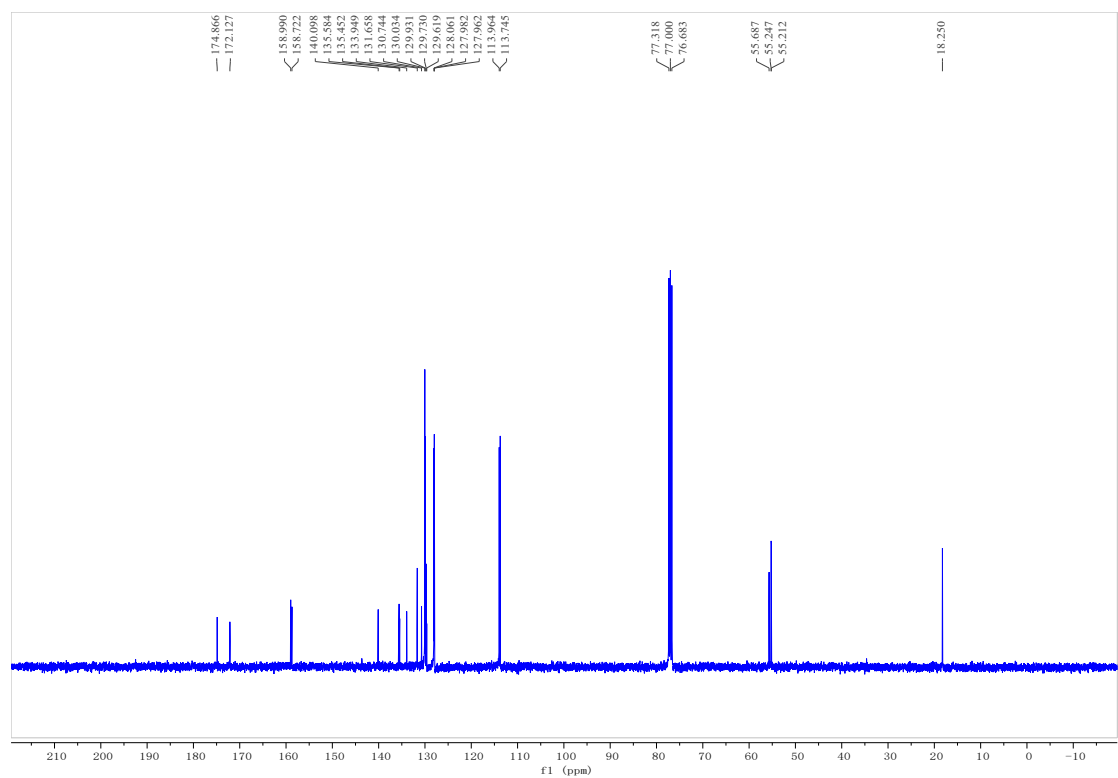



**$^1\text{H}$  and  $^{13}\text{C}$  NMR Spectra for Compound 3ge:** $^1\text{H}$  NMR (400 MHz,  $\text{CDCl}_3$ )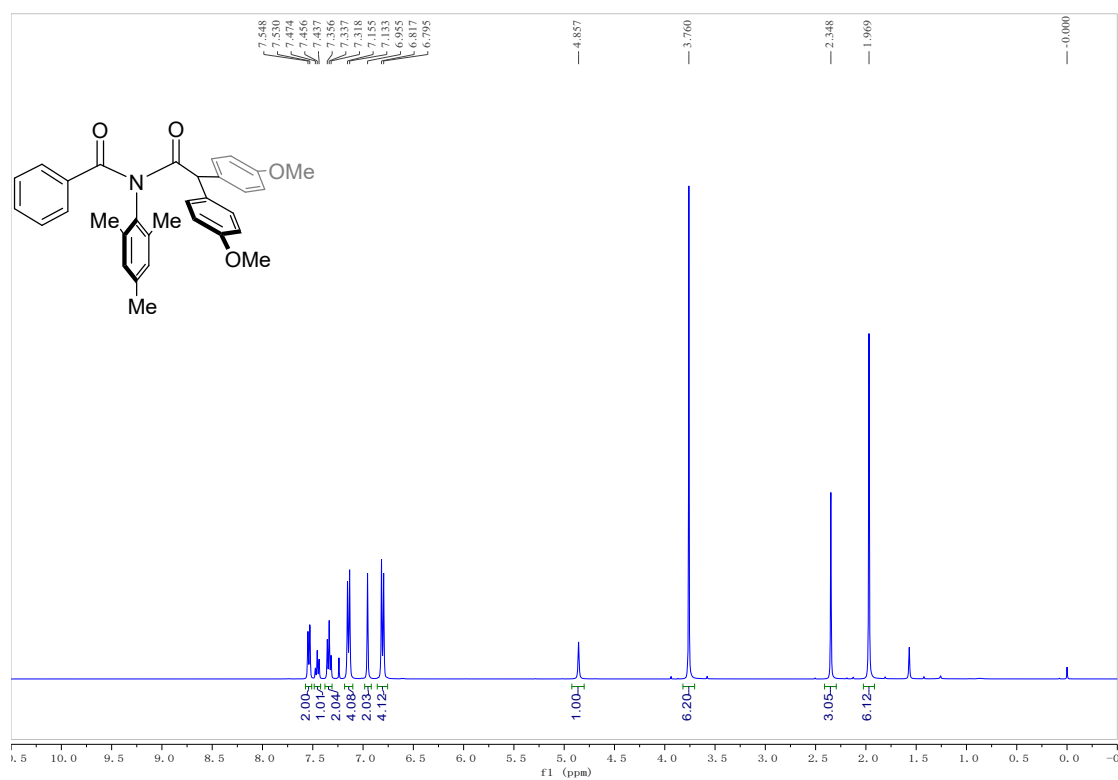 $^{13}\text{C}$  NMR (100 MHz,  $\text{CDCl}_3$ )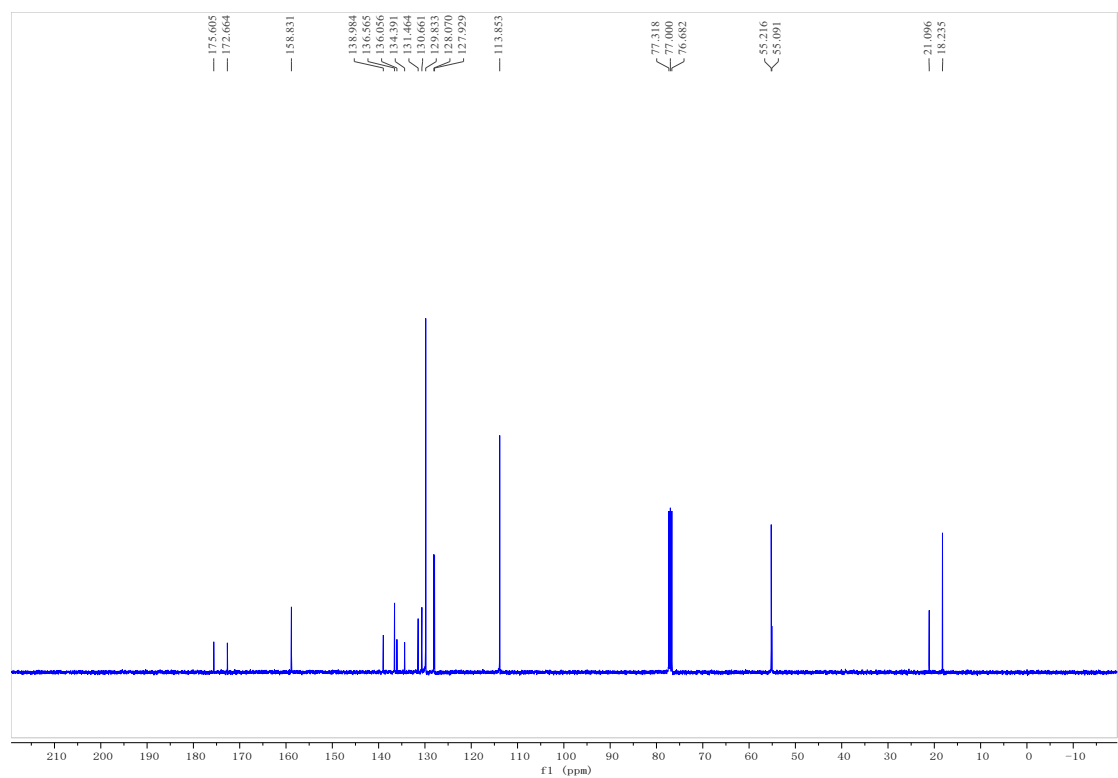

**<sup>1</sup>H and <sup>13</sup>C NMR Spectra for Compound 3ae:****<sup>1</sup>H NMR (400 MHz, CDCl<sub>3</sub>)**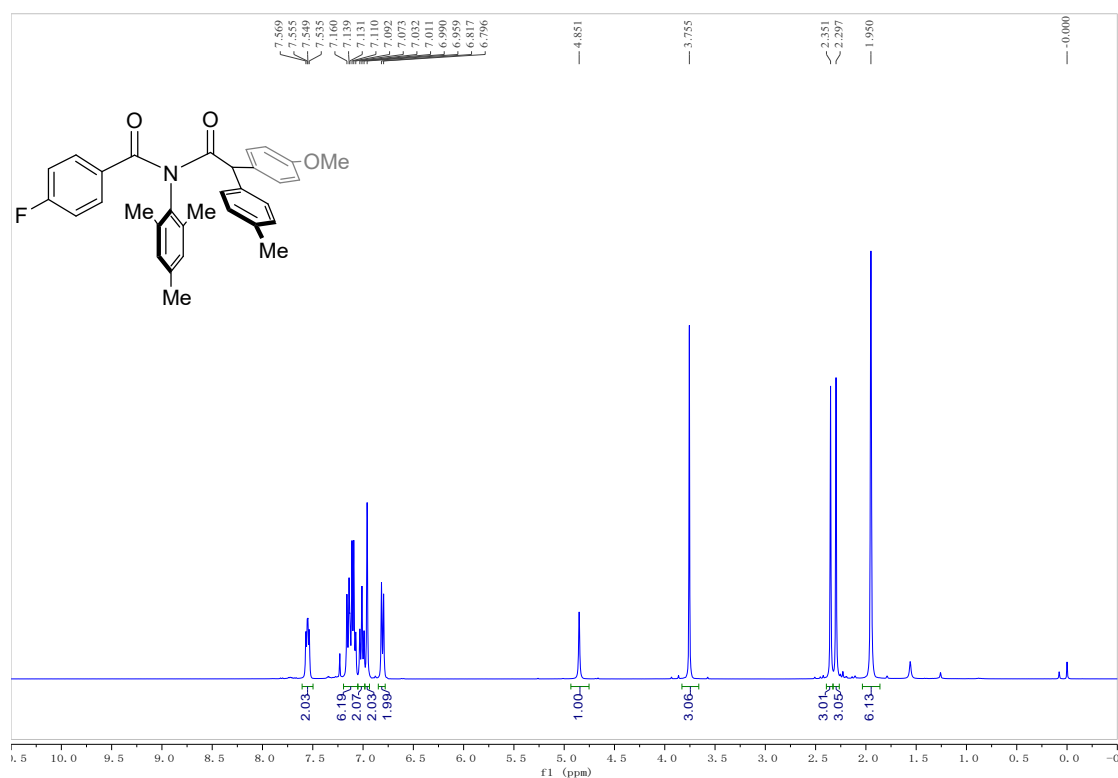**<sup>13</sup>C NMR (100 MHz, CDCl<sub>3</sub>)**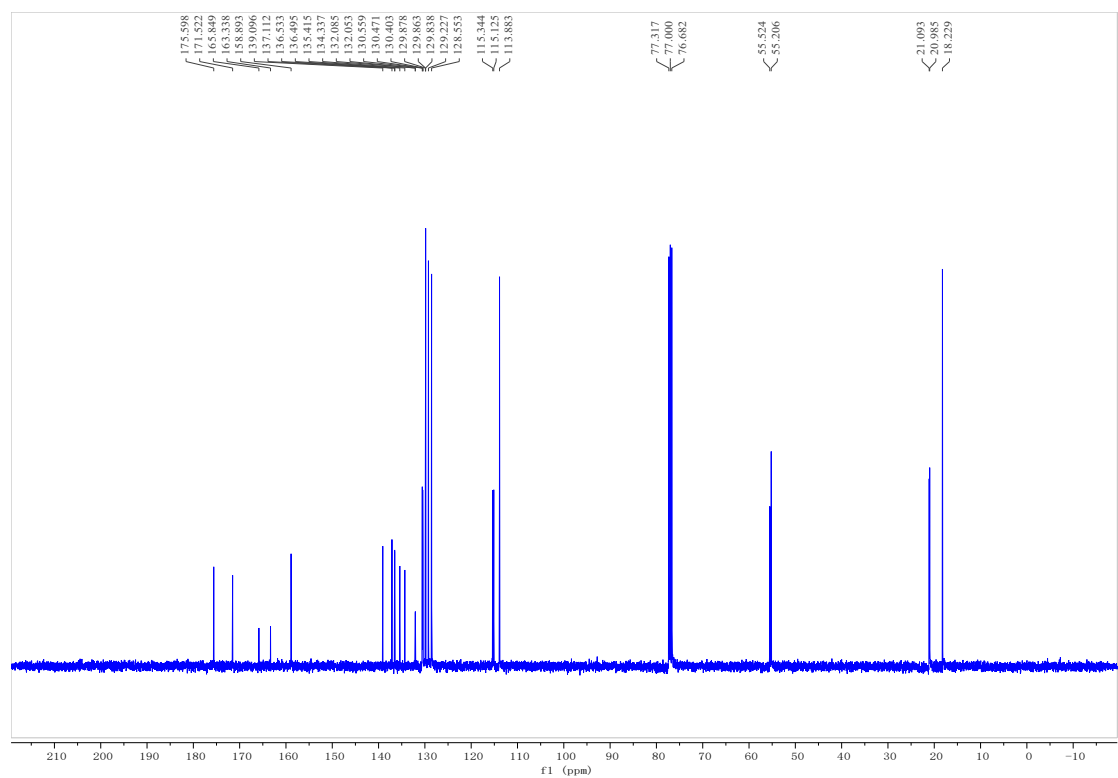

$^{19}\text{F}$  NMR (376 MHz,  $\text{CDCl}_3$ )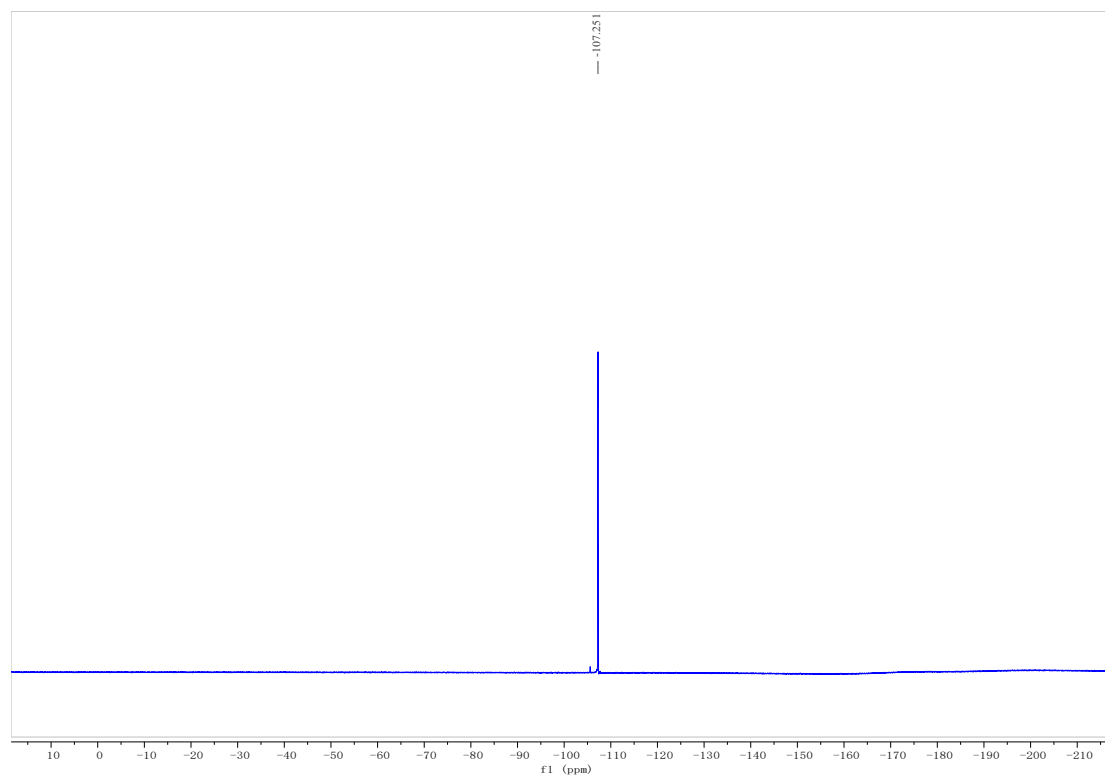 $^1\text{H}$  and  $^{13}\text{C}$  NMR Spectra for Compound 3qe: $^1\text{H}$  NMR (400 MHz,  $\text{CDCl}_3$ )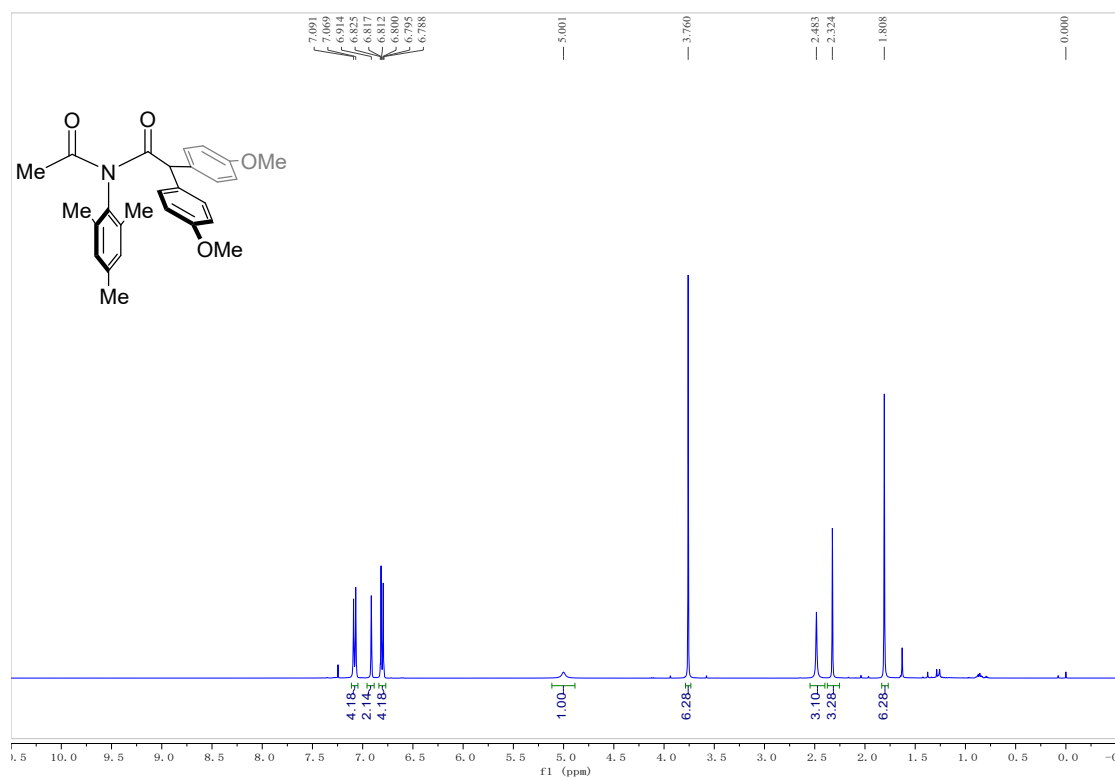

$^{13}\text{C}$  NMR (100 MHz,  $\text{CDCl}_3$ )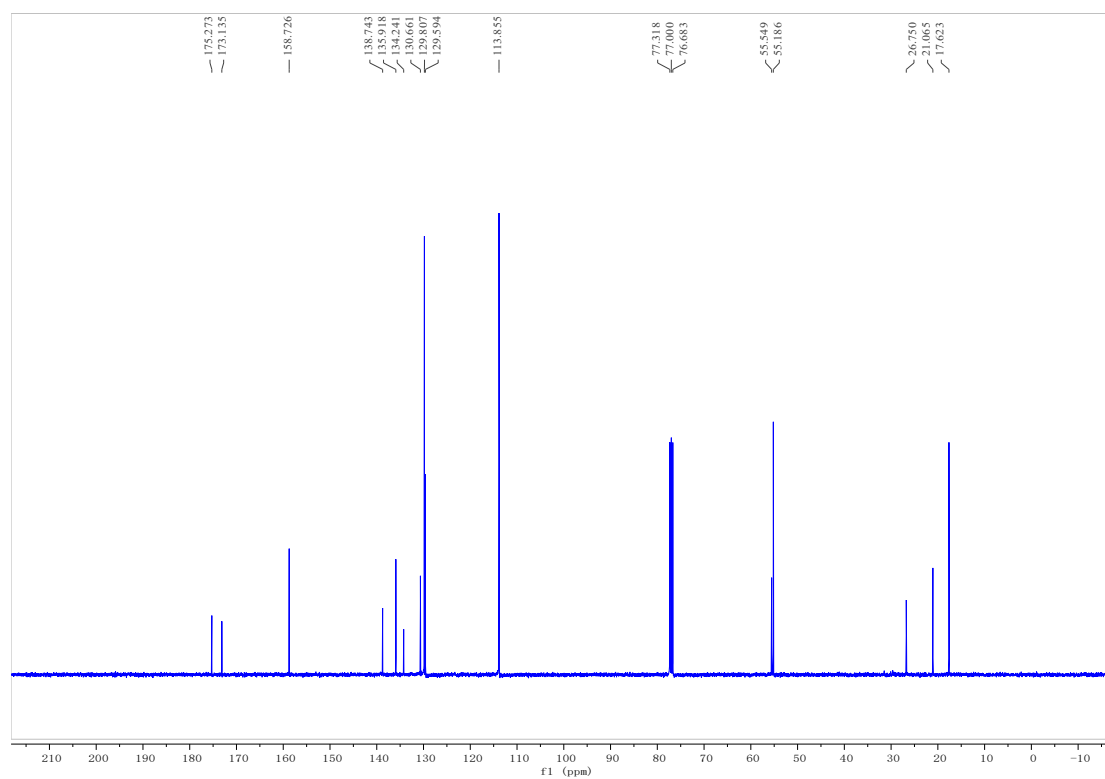 $^1\text{H}$  and  $^{13}\text{C}$  NMR Spectra for Compound 3se: $^1\text{H}$  NMR (400 MHz,  $\text{CDCl}_3$ )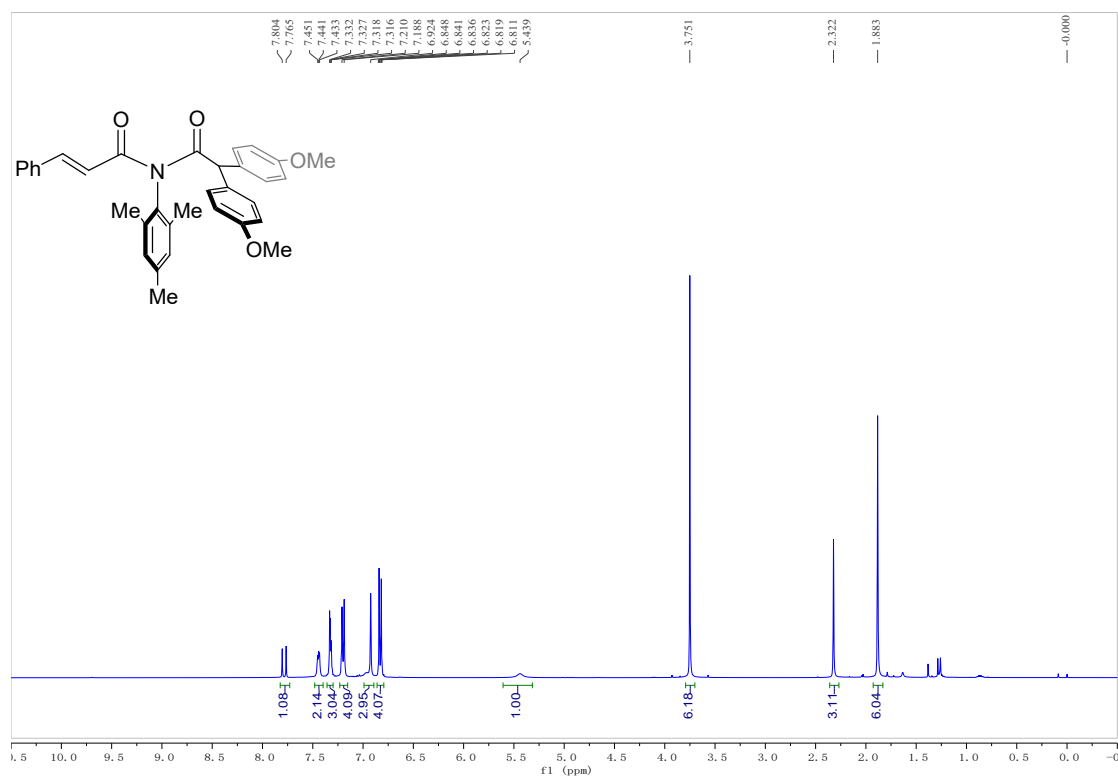

$^{13}\text{C}$  NMR (100 MHz,  $\text{CDCl}_3$ )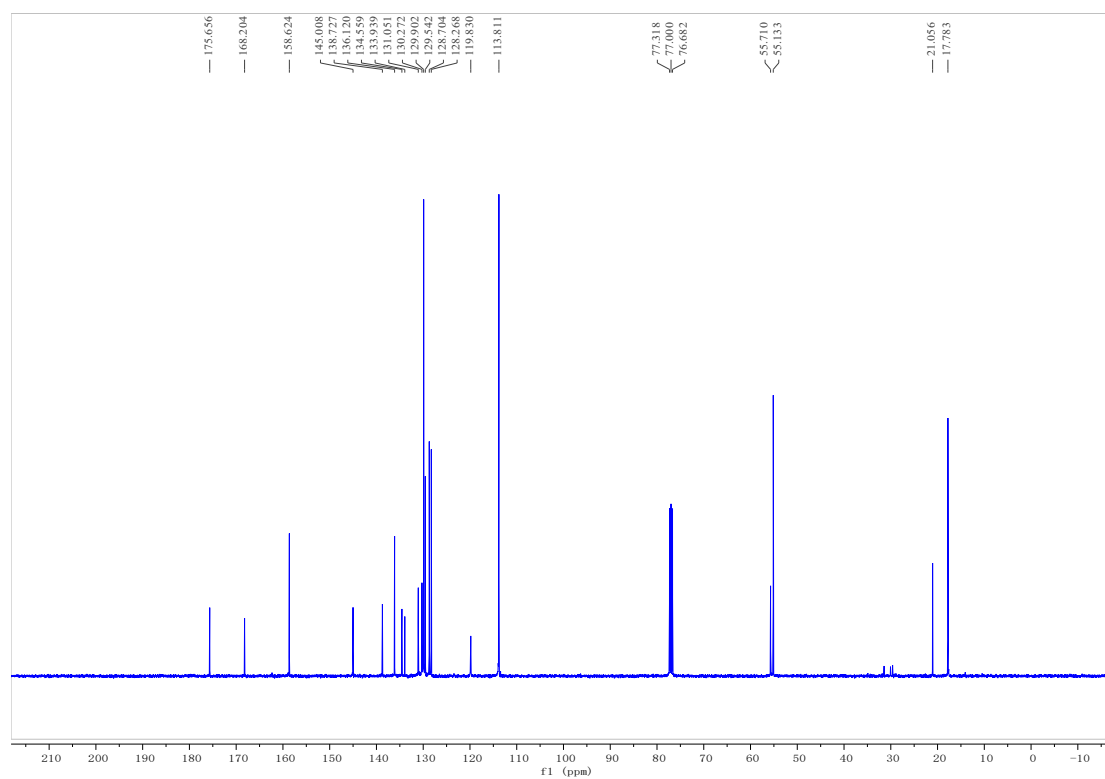 $^1\text{H}$  and  $^{13}\text{C}$  NMR Spectra for Compound 3ad-a: $^1\text{H}$  NMR (400 MHz,  $\text{CDCl}_3$ )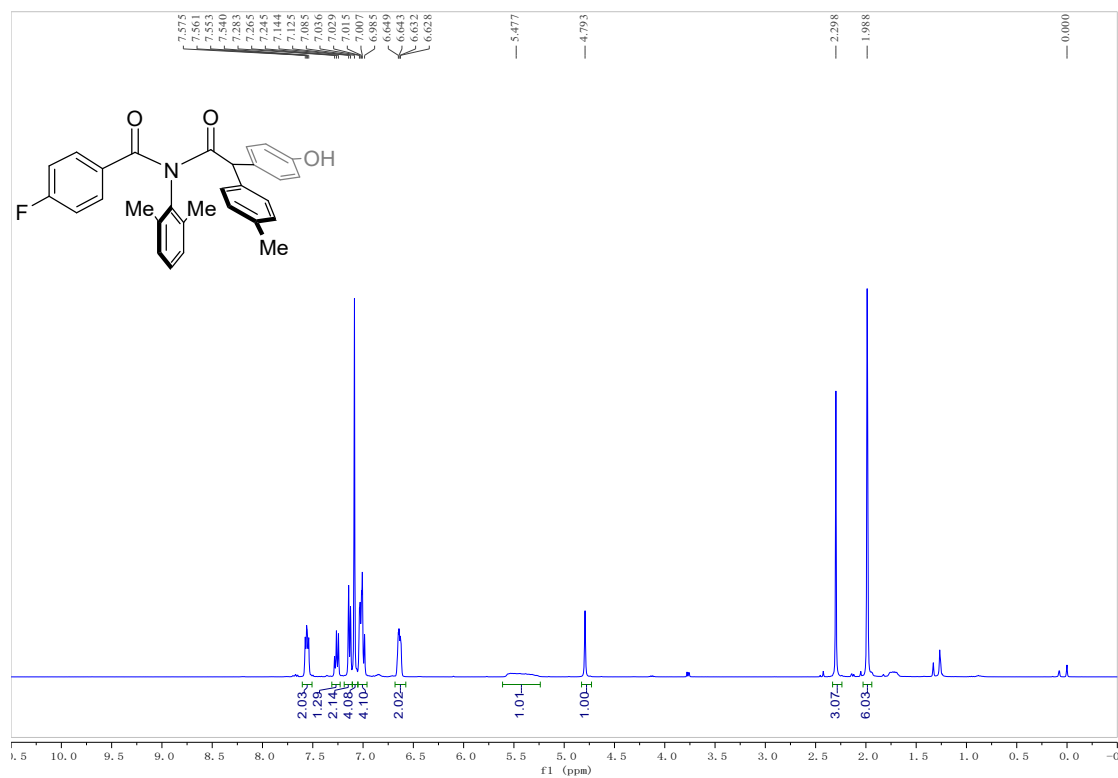

$^{13}\text{C}$  NMR (100 MHz,  $\text{CDCl}_3$ )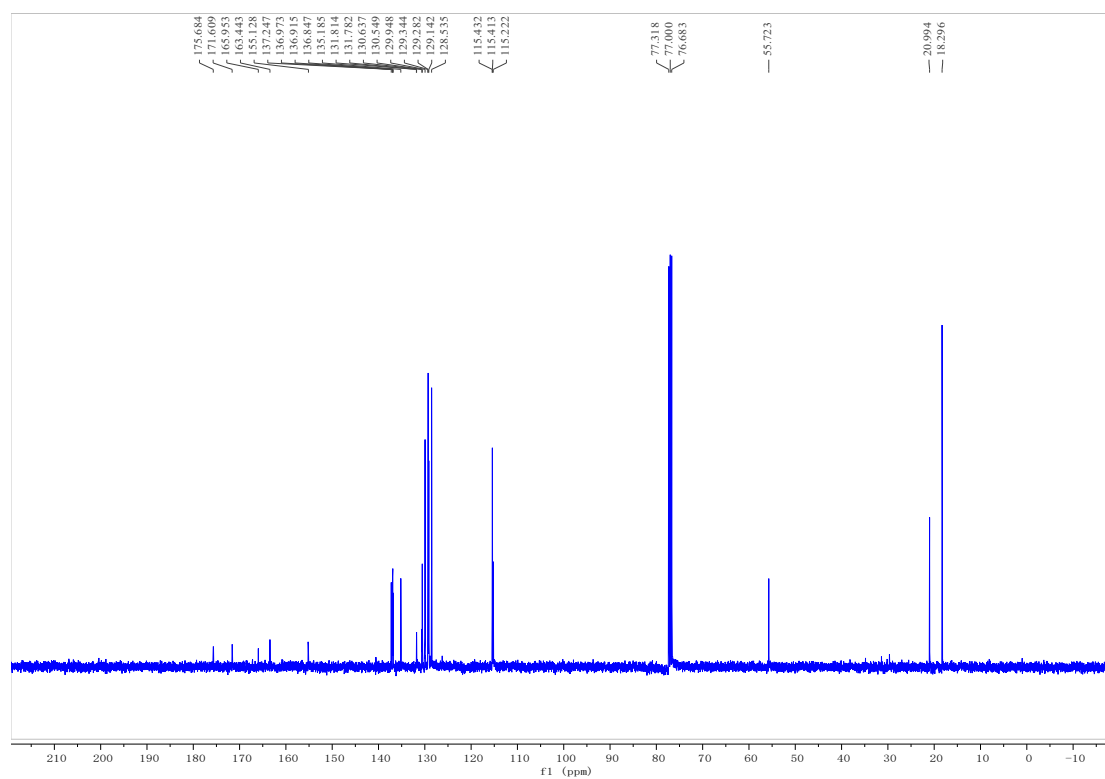 $^{19}\text{F}$  NMR (376 MHz,  $\text{CDCl}_3$ )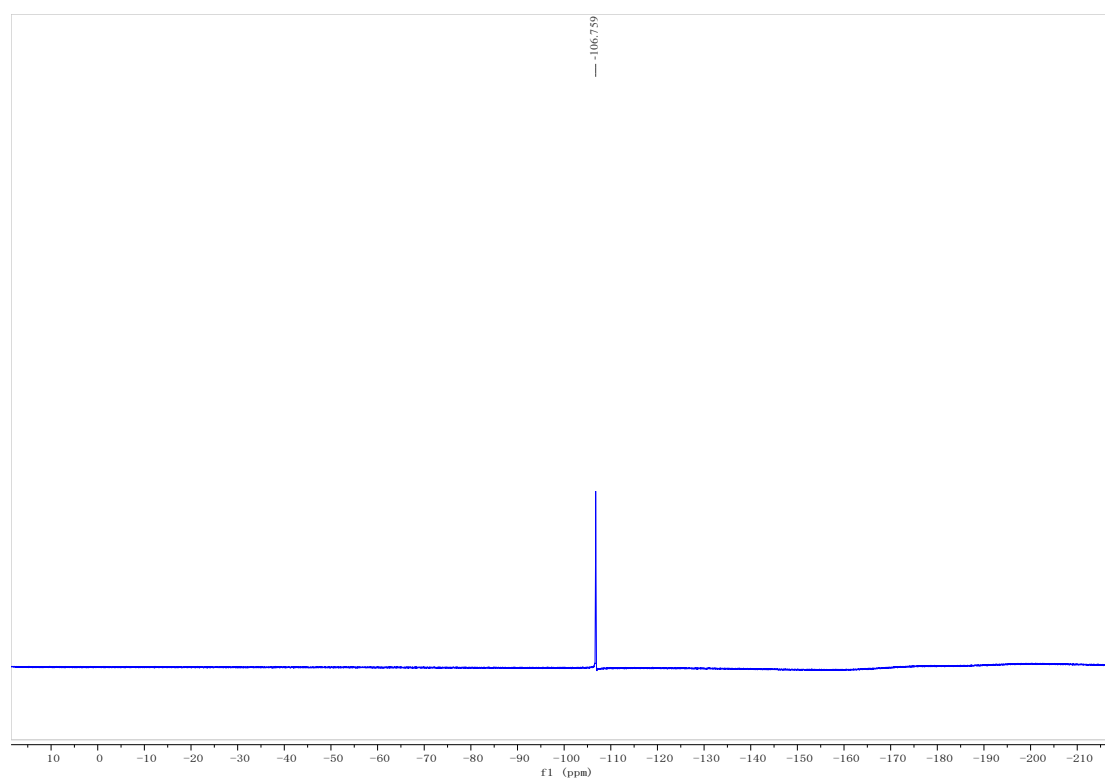

**<sup>1</sup>H and <sup>13</sup>C NMR Spectra for Compound 3ae-a:****<sup>1</sup>H NMR (400 MHz, CDCl<sub>3</sub>)**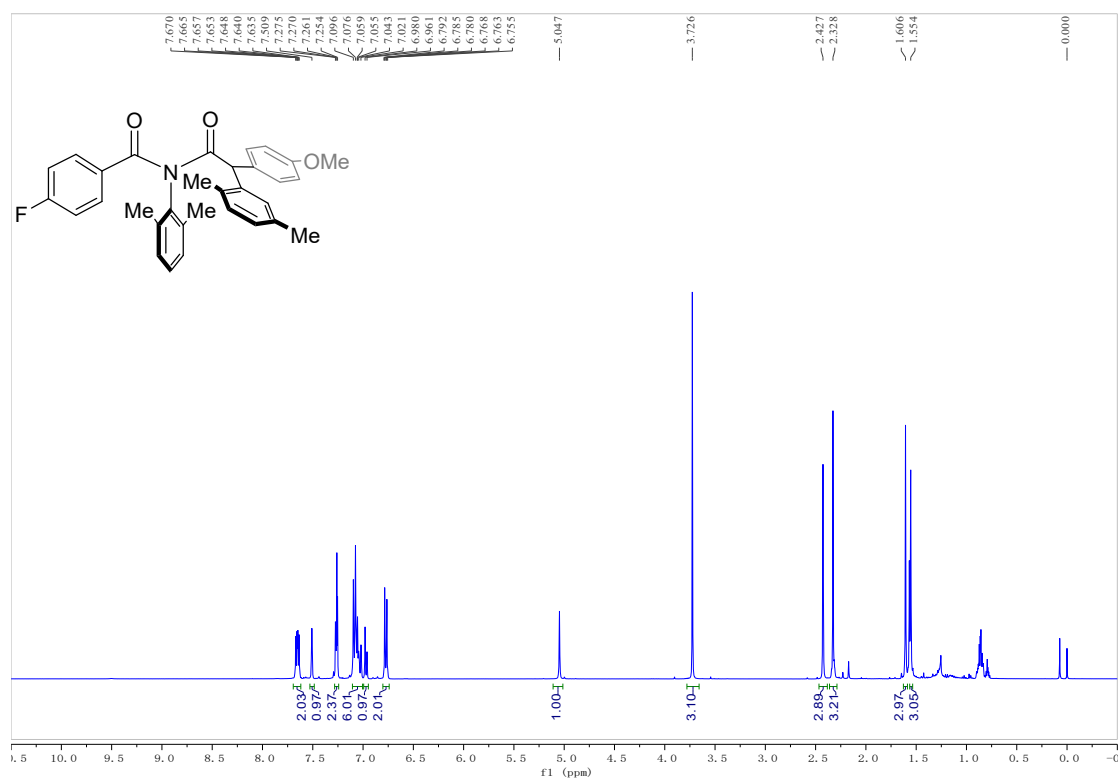**<sup>13</sup>C NMR (100 MHz, CDCl<sub>3</sub>)**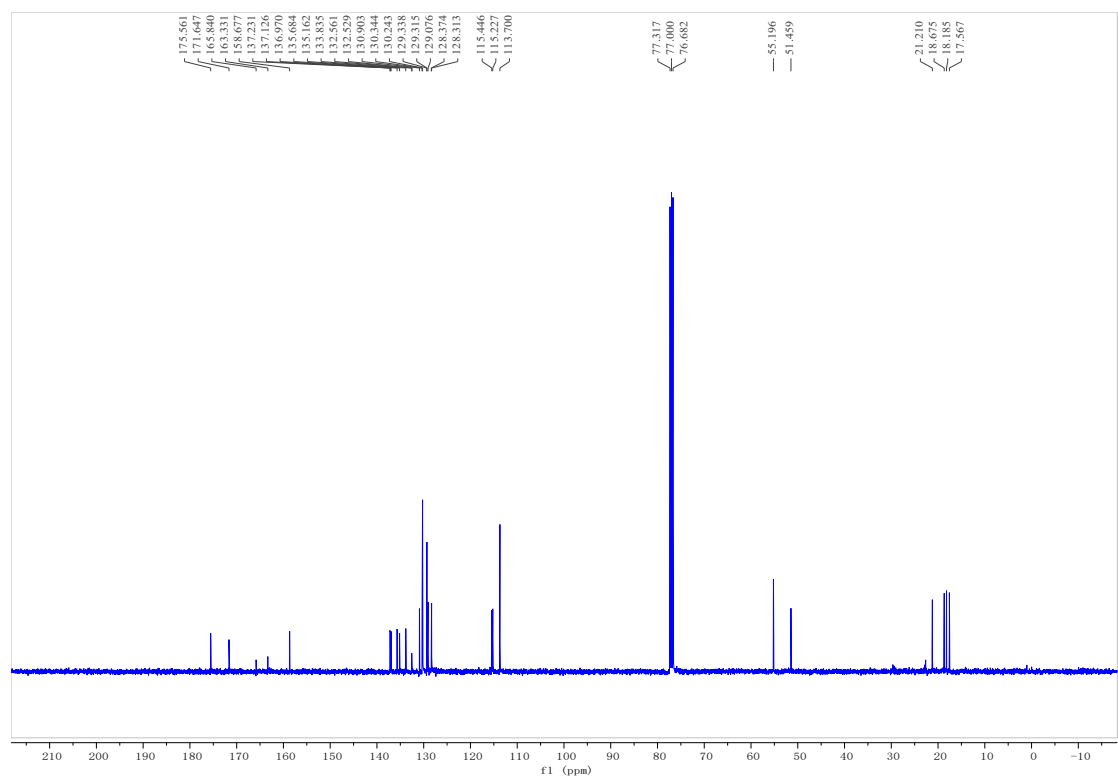

$^{19}\text{F}$  NMR (376 MHz,  $\text{CDCl}_3$ )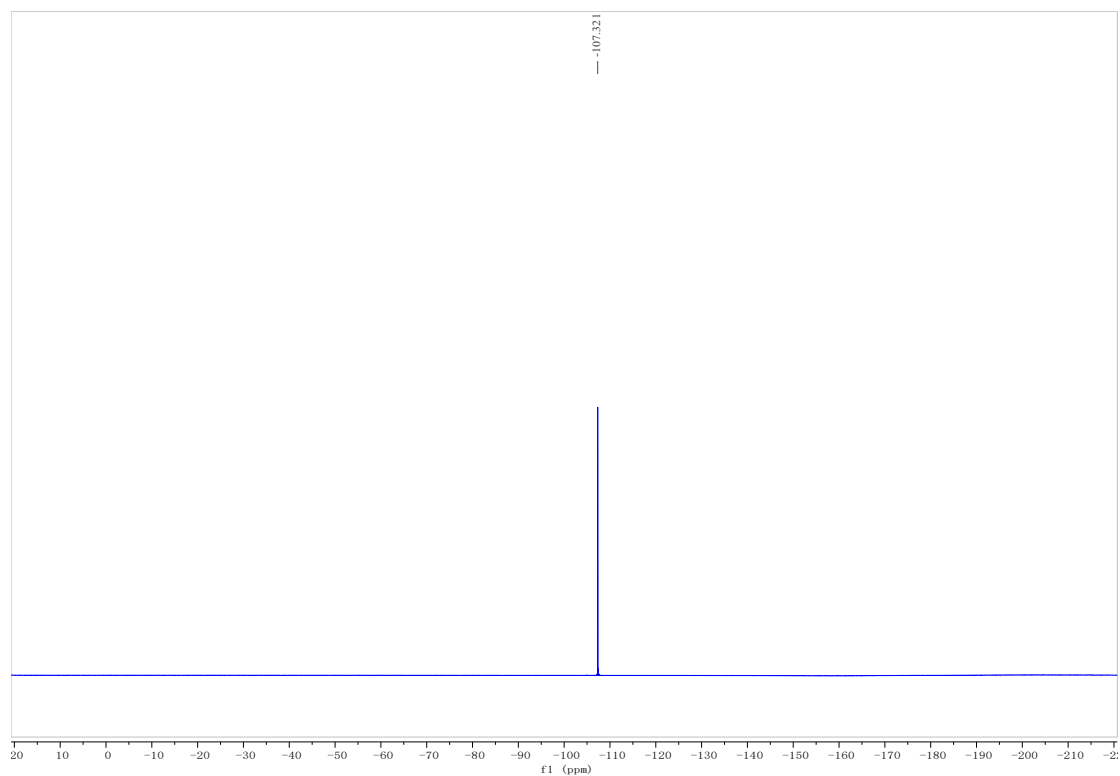 $^1\text{H}$  and  $^{13}\text{C}$  NMR Spectra for Compound 4: $^1\text{H}$  NMR (400 MHz,  $\text{CDCl}_3$ )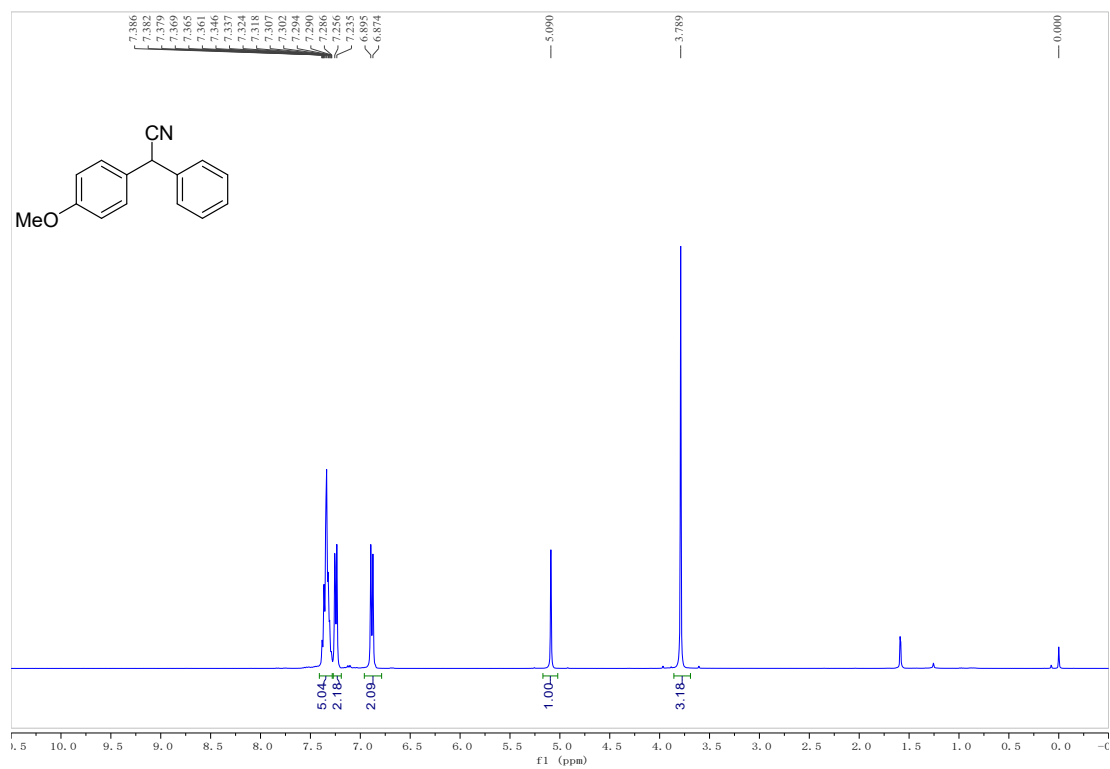



$^{13}\text{C}$  NMR (100 MHz,  $\text{CDCl}_3$ )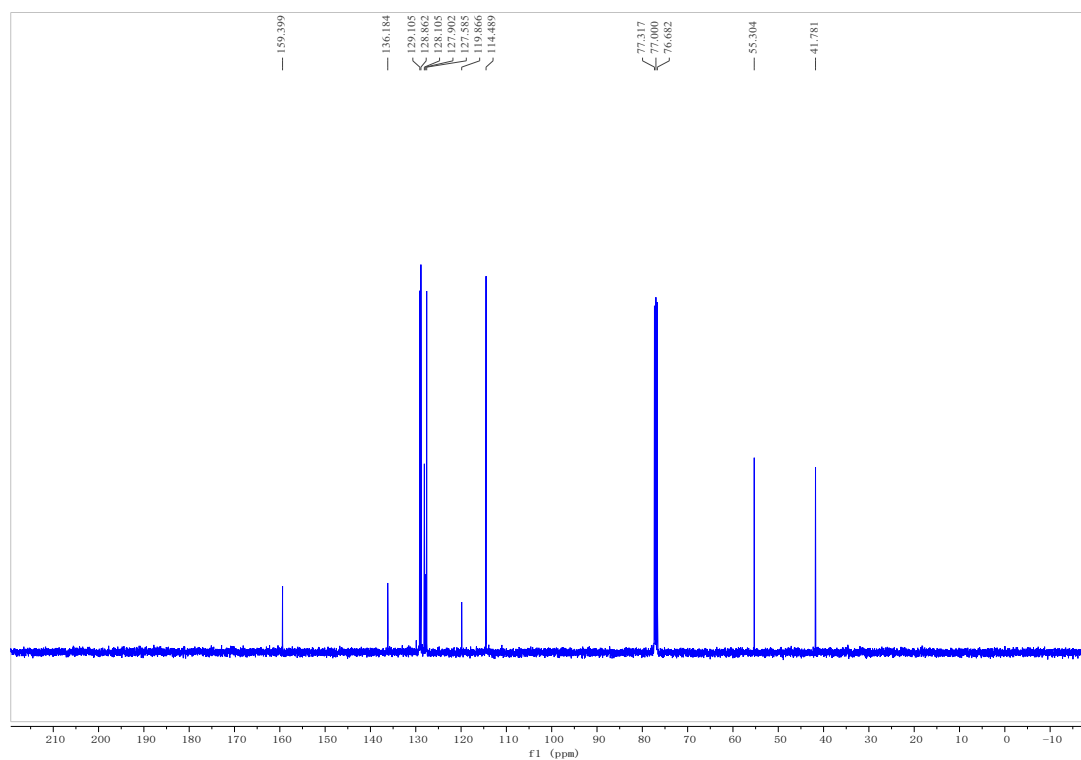 $^1\text{H}$  and  $^{13}\text{C}$  NMR Spectra for Compound 5: $^1\text{H}$  NMR (400 MHz,  $\text{CDCl}_3$ )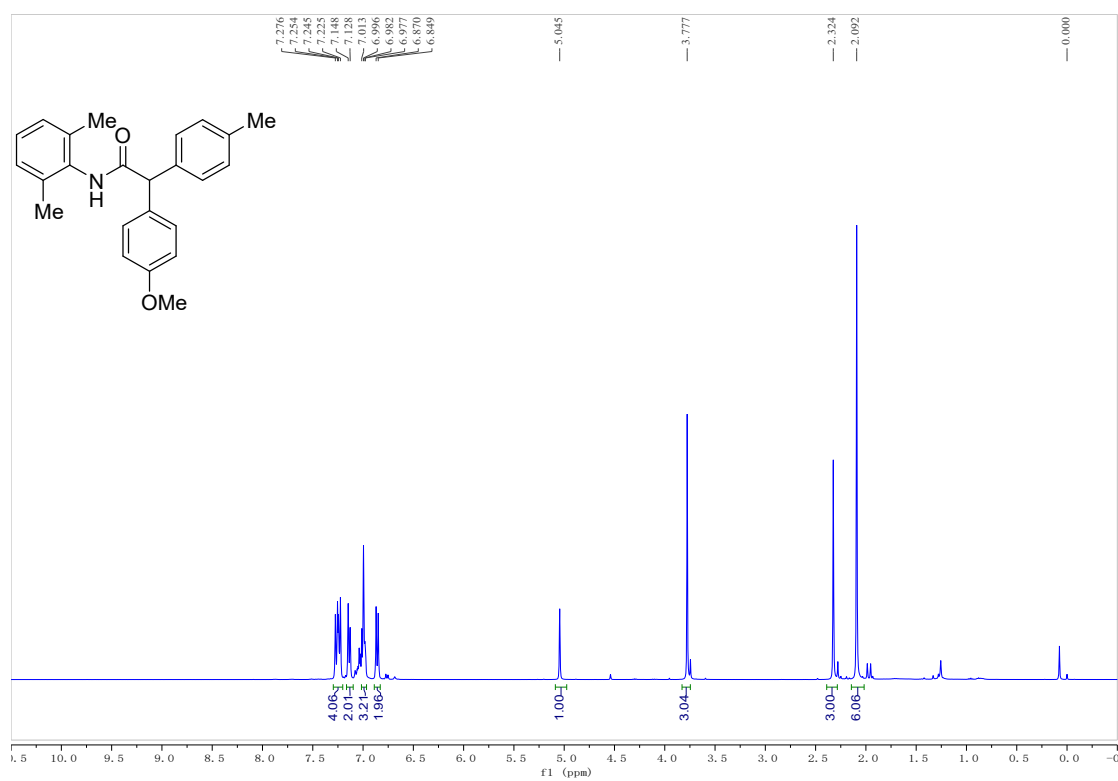

$^{13}\text{C}$  NMR (100 MHz,  $\text{CDCl}_3$ )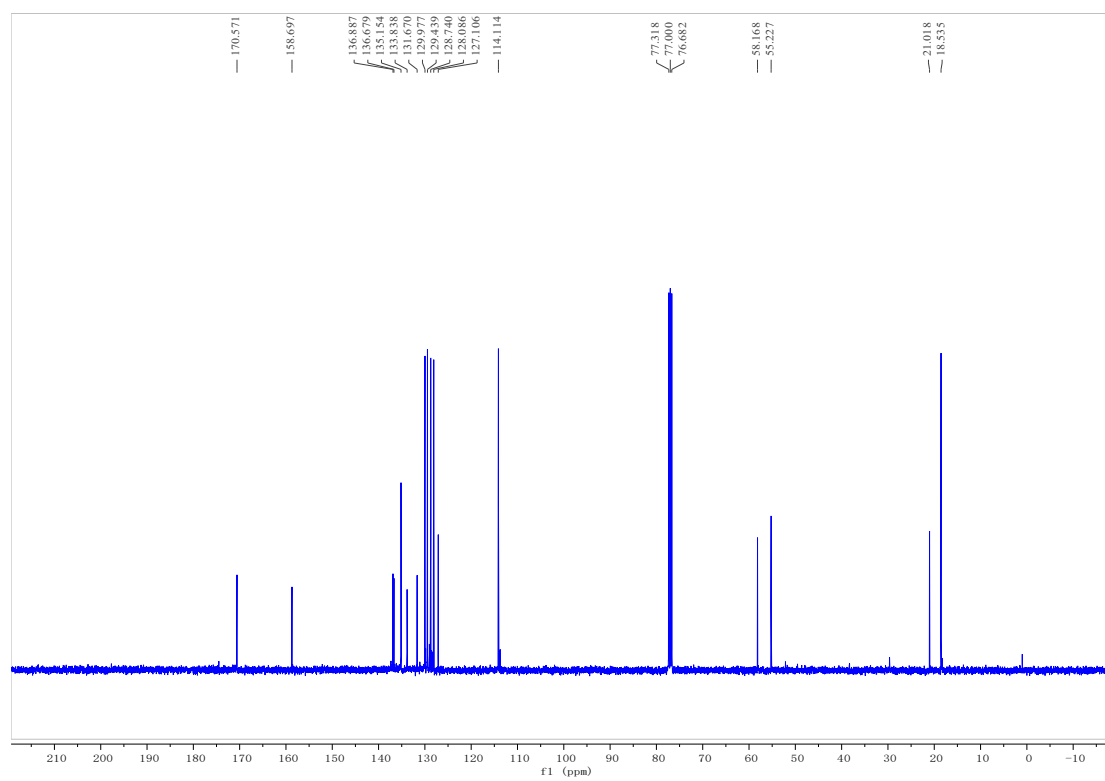

## 12 HPLC Spectra

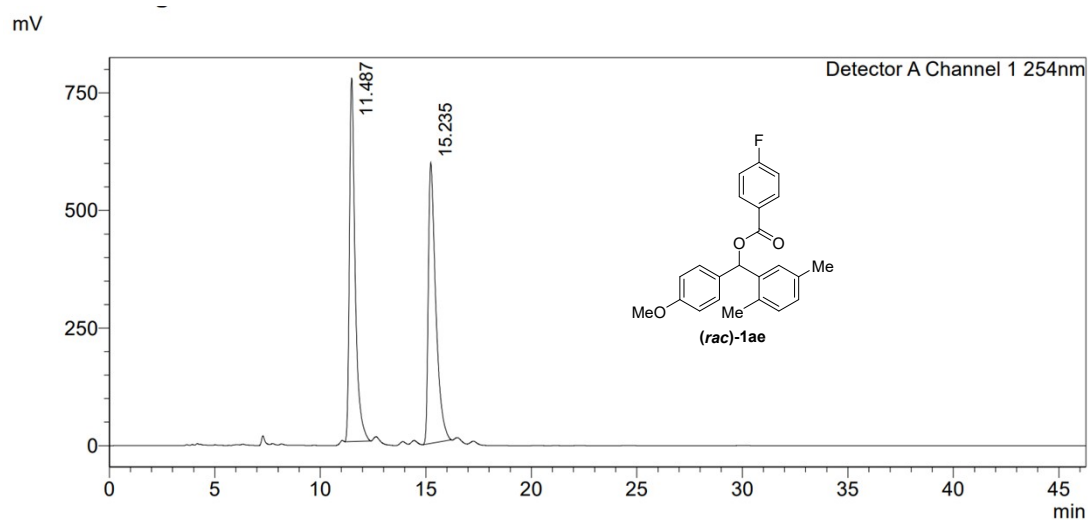

| Peak# | Ret. Time | Area     | Height  | Peak Start | Area%   | Width at 50% Height |
|-------|-----------|----------|---------|------------|---------|---------------------|
| 1     | 11.487    | 14596882 | 772443  | 11.158     | 49.854  | 0.268               |
| 2     | 15.235    | 14682416 | 596640  | 14.867     | 50.146  | 0.362               |
| Total |           | 29279298 | 1369083 |            | 100.000 |                     |

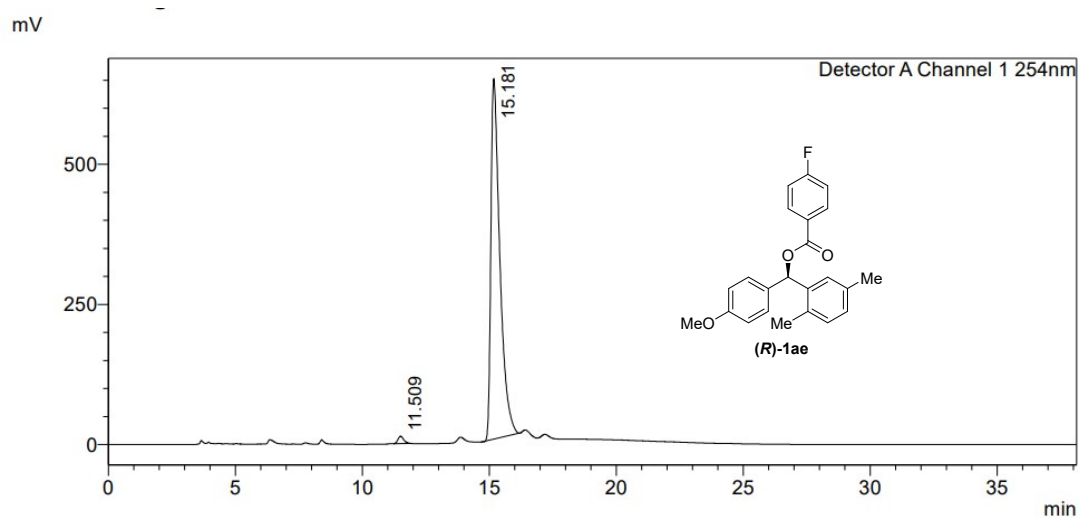

| Peak# | Ret. Time | Area     | Height | Peak Start | Area%   | Width at 50% Height |
|-------|-----------|----------|--------|------------|---------|---------------------|
| 1     | 11.509    | 210169   | 13103  | 11.242     | 1.314   | 0.246               |
| 2     | 15.181    | 15781065 | 642752 | 14.683     | 98.686  | 0.362               |
| Total |           | 15991234 | 655856 |            | 100.000 |                     |

97% ee of (*R*)-1ae was determined by HPLC: AD-H Column, 4/96 *i*PrOH/hexane, 0.8 mL/min, 254 nm, 35 °C; retention time = 11.51 min (minor), 15.18 min (major).

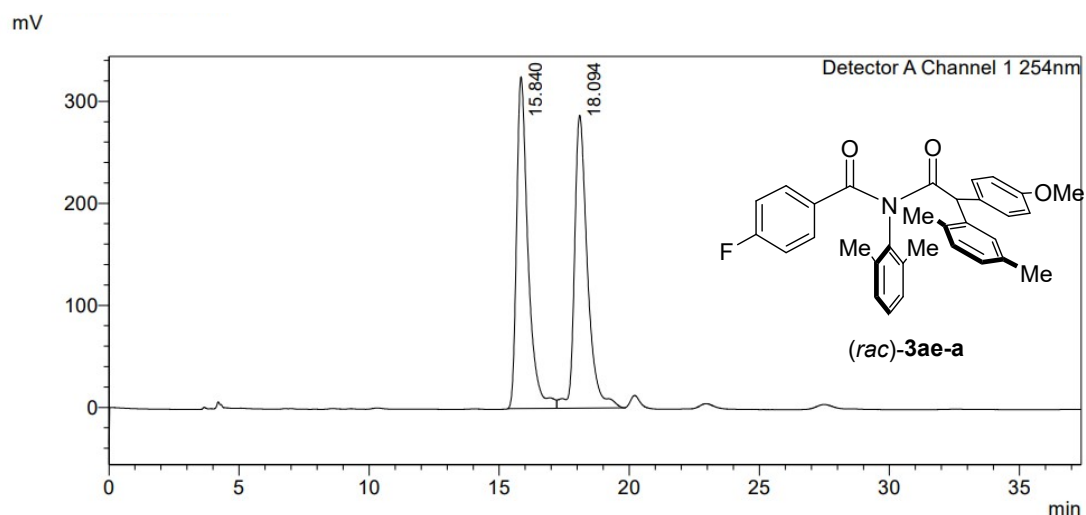

| Peak# | Ret. Time | Area     | Height | Peak Start | Area%   | Width at 50% Height |
|-------|-----------|----------|--------|------------|---------|---------------------|
| 1     | 15.840    | 9939101  | 324878 | 15.333     | 50.017  | 0.436               |
| 2     | 18.094    | 9932250  | 286957 | 17.217     | 49.983  | 0.492               |
| Total |           | 19871351 | 611835 |            | 100.000 |                     |

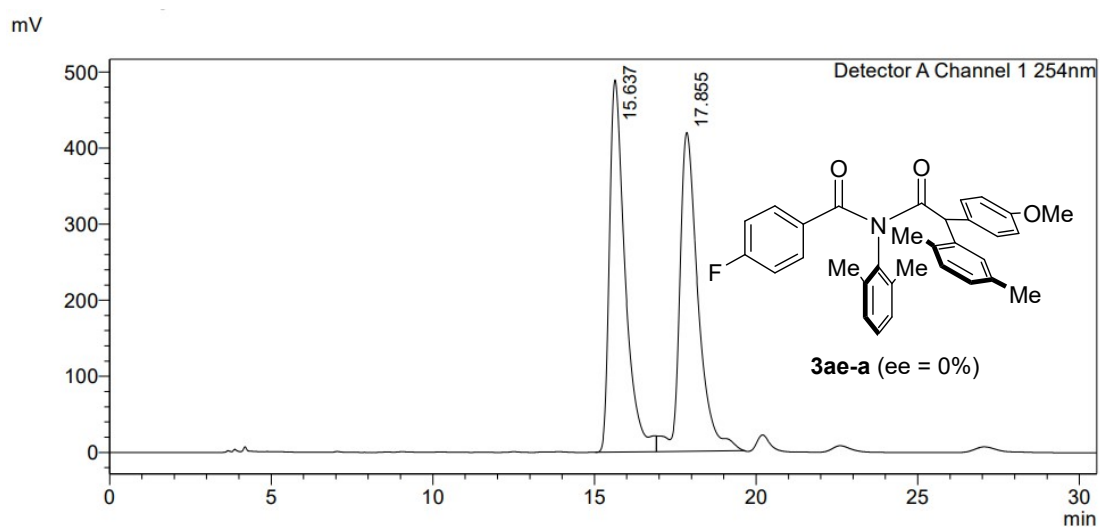

| Peak# | Ret. Time | Area     | Height | Peak Start | Area%   | Width at 50% Height |
|-------|-----------|----------|--------|------------|---------|---------------------|
| 1     | 15.637    | 16452295 | 488964 | 15.025     | 49.718  | 0.485               |
| 2     | 17.855    | 16638620 | 418982 | 16.917     | 50.282  | 0.559               |
| Total |           | 33090915 | 907947 |            | 100.000 |                     |

0% ee of **3ae-a** was determined by HPLC: AD-H Column, 2/98 *i*PrOH/hexane, 0.8 mL/min, 254 nm, 35 °C; retention time = 15.64 min, 17.86 min.
